# Supplementary material
Source: publisher figshare collection journal article supplement (https://acs.figshare.com/ndownloader/files/24159255)
Supplement: Supplementary file 1 [file 24159255]

## Sheet: Table S4
Table S4. List of proteins from the simili SARS-CoV-2 swabs and their spectral counts.
MS data file	\\sauval\Data_MS\_SRAS_CoV2\MS20-019_CoV2_Matrices\2020-05-15
Database :	MS20-019_Swissprot_Human_ISL_410545_2020-05-18 (20139 sequences)
Enzyme :	Trypsin - Max missed cleavages: 2
Fixed modifications :	Carbamidomethyl (C)
Variable modifications :	Deamidated (NQ), Oxidation (M)
MS/ MS² mass tol. :	± 5.0 ppm / ± 0.02 Da
Instrument type :	Q-Exactive HF
Protein characteristics				Spectral counts with parsimony														Number of peptides with parsimony														Number of peptides without parsimony
Protein Group	Accession	Description	MW (Da)	Q10750_MS20-019_N1_dil-7	Q10751_MS20-019_N3_dil-7	Q10752_MS20-019_N1_dil-6	Q10753_MS20-019_N3_dil-6	Q10754_MS20-019_N1_dil-5	Q10755_MS20-019_N3_dil-5	Q10756_MS20-019_N1_dil-4	Q10757_MS20-019_N3_dil-4	Q10758_MS20-019_N1_dil-3	Q10759_MS20-019_N3_dil-3	Q10760_MS20-019_N1_dil-2	Q10761_MS20-019_N3_dil-2	Q10762_MS20-019_N1_dil-1	Q10763_MS20-019_N3_dil-1	Q10750_MS20-019_N1_dil-7	Q10751_MS20-019_N3_dil-7	Q10752_MS20-019_N1_dil-6	Q10753_MS20-019_N3_dil-6	Q10754_MS20-019_N1_dil-5	Q10755_MS20-019_N3_dil-5	Q10756_MS20-019_N1_dil-4	Q10757_MS20-019_N3_dil-4	Q10758_MS20-019_N1_dil-3	Q10759_MS20-019_N3_dil-3	Q10760_MS20-019_N1_dil-2	Q10761_MS20-019_N3_dil-2	Q10762_MS20-019_N1_dil-1	Q10763_MS20-019_N3_dil-1	Q10750_MS20-019_N1_dil-7	Q10751_MS20-019_N3_dil-7	Q10752_MS20-019_N1_dil-6	Q10753_MS20-019_N3_dil-6	Q10754_MS20-019_N1_dil-5	Q10755_MS20-019_N3_dil-5	Q10756_MS20-019_N1_dil-4	Q10757_MS20-019_N3_dil-4	Q10758_MS20-019_N1_dil-3	Q10759_MS20-019_N3_dil-3	Q10760_MS20-019_N1_dil-2	Q10761_MS20-019_N3_dil-2	Q10762_MS20-019_N1_dil-1	Q10763_MS20-019_N3_dil-1
1	sp|P63261|ACTG_HUMAN	sp|P63261|ACTG_HUMAN Actin, cytoplasmic 2 OS=Homo sapiens GN=ACTG1 PE=1 SV=1	42107.92	91	73	92	79	90	80	91	81	85	79	91	77	84	75	6	7	6	7	6	7	6	6	6	7	6	6	6	6	6	7	6	7	6	7	6	6	6	7	6	6	6	6
2	sp|P35579|MYH9_HUMAN	sp|P35579|MYH9_HUMAN Myosin-9 OS=Homo sapiens GN=MYH9 PE=1 SV=4	227646.06	42	50	47	59	45	61	53	59	49	66	41	62	39	61	22	21	24	24	24	26	27	25	23	28	23	25	19	27	22	21	24	24	24	26	27	25	23	28	23	25	19	27
2	sp|Q7Z406|MYH14_HUMAN	sp|Q7Z406|MYH14_HUMAN Myosin-14 OS=Homo sapiens GN=MYH14 PE=1 SV=2	228701.13	7	3	7	5	3	5	7	4	7	4	2	5	2	4	6	3	5	5	2	5	6	4	6	4	2	5	2	4	8	5	7	7	2	7	8	5	8	6	3	7	4	6
3	sp|P03973|SLPI_HUMAN	sp|P03973|SLPI_HUMAN Antileukoproteinase OS=Homo sapiens GN=SLPI PE=1 SV=2	15228.25	51	53	47	55	47	56	48	54	42	60	48	59	49	55	11	10	11	11	10	10	11	11	9	11	11	11	10	10	11	10	11	11	10	10	11	11	9	11	11	11	10	10
4	sp|O43707|ACTN4_HUMAN	sp|O43707|ACTN4_HUMAN Alpha-actinin-4 OS=Homo sapiens GN=ACTN4 PE=1 SV=2	105244.64	33	29	33	32	33	32	37	32	35	31	35	34	39	27	14	12	13	12	12	12	14	12	12	13	13	14	11	10	14	12	13	12	12	12	14	12	12	13	13	14	11	10
4	sp|P12814|ACTN1_HUMAN	sp|P12814|ACTN1_HUMAN Alpha-actinin-1 OS=Homo sapiens GN=ACTN1 PE=1 SV=2	103562.85	8	8	12	9	12	6	12	10	13	11	12	8	14	6	5	5	5	5	6	5	5	6	5	6	6	5	5	4	10	10	10	10	11	10	10	10	9	11	11	10	9	9
5	sp|P01024|CO3_HUMAN	sp|P01024|CO3_HUMAN Complement C3 OS=Homo sapiens GN=C3 PE=1 SV=2	188569.45	43	18	47	17	45	18	46	19	45	21	46	21	50	21	18	12	20	12	20	12	20	13	19	12	18	13	20	14	18	12	20	12	20	12	20	13	19	12	18	13	20	14
6	sp|P05109|S10A8_HUMAN	sp|P05109|S10A8_HUMAN Protein S100-A8 OS=Homo sapiens GN=S100A8 PE=1 SV=1	10884.67	37	36	36	33	32	32	32	30	33	29	31	30	26	27	4	4	6	4	5	4	4	5	4	4	6	4	5	4	4	4	6	4	5	4	4	5	4	4	6	4	5	4
7	sp|P15924|DESP_HUMAN	sp|P15924|DESP_HUMAN Desmoplakin OS=Homo sapiens GN=DSP PE=1 SV=3	334020.62	25	31	29	31	30	33	34	37	26	36	28	38	25	36	22	22	25	25	26	24	27	29	23	29	25	31	23	30	22	22	25	25	26	24	27	29	23	29	25	31	23	30
8	sp|P00738|HPT_HUMAN	sp|P00738|HPT_HUMAN Haptoglobin OS=Homo sapiens GN=HP PE=1 SV=1	45860.82	29	21	35	29	34	31	30	30	29	31	32	30	33	32	10	9	10	10	10	9	10	9	10	9	9	10	10	10	10	9	10	10	10	9	10	9	10	9	9	10	10	10
9	sp|P01833|PIGR_HUMAN	sp|P01833|PIGR_HUMAN Polymeric immunoglobulin receptor OS=Homo sapiens GN=PIGR PE=1 SV=4	84429.1	35	24	34	23	34	22	34	21	32	24	33	23	35	22	5	5	5	5	5	5	5	5	5	5	5	5	5	5	5	5	5	5	5	5	5	5	5	5	5	5	5	5
10	sp|P31947|1433S_HUMAN	sp|P31947|1433S_HUMAN 14-3-3 protein sigma OS=Homo sapiens GN=SFN PE=1 SV=1	27870.74	23	29	25	33	26	29	26	32	25	31	22	33	22	31	9	9	9	9	9	9	9	9	9	9	9	9	9	9	9	9	9	9	9	9	9	9	9	9	9	9	9	9
10	sp|P63104|1433Z_HUMAN	sp|P63104|1433Z_HUMAN 14-3-3 protein zeta/delta OS=Homo sapiens GN=YWHAZ PE=1 SV=1	27898.79	16	22	17	21	13	20	16	18	18	19	15	19	15	23	5	6	5	6	5	6	6	6	6	6	6	6	6	6	6	7	6	7	6	7	7	7	7	7	7	7	7	7
10	sp|P61981|1433G_HUMAN	sp|P61981|1433G_HUMAN 14-3-3 protein gamma OS=Homo sapiens GN=YWHAG PE=1 SV=2	28455.98	5	4	5	6	5	5	5	8	4	5	5	7	7	8	2	2	2	2	3	2	2	3	3	2	2	3	3	3	4	4	4	4	5	4	4	5	5	4	4	5	5	5
10	sp|P27348|1433T_HUMAN	sp|P27348|1433T_HUMAN 14-3-3 protein theta OS=Homo sapiens GN=YWHAQ PE=1 SV=1	28031.87	3	5	2	5	2	4	4	4	4	3	2	4	3	3	3	3	2	3	2	2	3	2	4	2	2	2	2	2	6	6	5	6	5	5	6	5	7	5	5	5	5	5
10	sp|P31946|1433B_HUMAN	sp|P31946|1433B_HUMAN 14-3-3 protein beta/alpha OS=Homo sapiens GN=YWHAB PE=1 SV=3	28178.87	5	6	6	8	5	6	6	6	6	7	7	7	6	7	2	2	2	2	2	2	2	2	2	2	2	2	2	2	6	5	6	6	5	5	6	5	6	5	5	5	5	5
10	sp|Q04917|1433F_HUMAN	sp|Q04917|1433F_HUMAN 14-3-3 protein eta OS=Homo sapiens GN=YWHAH PE=1 SV=4	28372.08	2	1	2	4	2	2	2	1	2	2	2	1	1	2	1	1	2	2	2	2	1	1	2	2	2	1	1	2	3	3	4	4	4	4	3	3	4	4	4	3	3	4
11	sp|P49913|CAMP_HUMAN	sp|P49913|CAMP_HUMAN Cathelicidin antimicrobial peptide OS=Homo sapiens GN=CAMP PE=1 SV=1	19517.24	19	34	19	27	19	33	22	28	16	29	19	26	20	25	7	7	7	7	7	7	7	7	7	7	7	7	7	7	7	7	7	7	7	7	7	7	7	7	7	7	7	7
12	sp|P29401|TKT_HUMAN	sp|P29401|TKT_HUMAN Transketolase OS=Homo sapiens GN=TKT PE=1 SV=3	68518.98	21	23	21	22	21	25	24	23	21	21	29	22	25	24	8	10	10	9	9	10	10	9	10	10	10	9	10	10	8	10	10	9	9	10	10	9	10	10	10	9	10	10
13	sp|P30838|AL3A1_HUMAN	sp|P30838|AL3A1_HUMAN Aldehyde dehydrogenase, dimeric NADP-preferring OS=Homo sapiens GN=ALDH3A1 PE=1 SV=3	50762.0	24	22	28	18	22	21	24	22	27	23	25	21	24	18	11	9	10	10	10	9	11	11	11	11	11	11	12	9	11	9	10	10	10	9	11	11	11	11	11	11	12	9
14	sp|P0CG06|LAC3_HUMAN	sp|P0CG06|LAC3_HUMAN Ig lambda-3 chain C regions OS=Homo sapiens GN=IGLC3 PE=1 SV=1	11401.58	20	16	22	17	24	16	27	19	23	21	28	22	26	17	2	2	2	2	3	2	3	3	3	3	3	3	3	2	2	2	2	2	3	2	3	3	3	3	3	3	3	2
14	sp|B9A064|IGLL5_HUMAN	sp|B9A064|IGLL5_HUMAN Immunoglobulin lambda-like polypeptide 5 OS=Homo sapiens GN=IGLL5 PE=2 SV=2	23390.77	3	4	3	3	5	1	2	2	4	2	2	3	0	1	1	1	1	1	2	1	1	1	1	1	1	1	0	1	2	2	2	2	4	2	3	3	3	3	3	3	2	2
15	sp|P01877|IGHA2_HUMAN	sp|P01877|IGHA2_HUMAN Ig alpha-2 chain C region OS=Homo sapiens GN=IGHA2 PE=1 SV=3	37301.31	29	17	26	15	24	15	28	13	26	14	26	14	30	15	3	2	2	2	3	2	2	2	2	2	4	2	2	2	3	2	2	2	3	2	2	2	2	2	4	2	2	2
16	sp|P15311|EZRI_HUMAN	sp|P15311|EZRI_HUMAN Ezrin OS=Homo sapiens GN=EZR PE=1 SV=4	69483.78	20	18	18	27	22	23	29	28	26	26	23	29	27	24	11	11	11	14	14	12	16	15	16	14	14	15	15	13	11	11	11	14	14	12	16	15	16	14	14	15	15	13
16	sp|P26038|MOES_HUMAN	sp|P26038|MOES_HUMAN Moesin OS=Homo sapiens GN=MSN PE=1 SV=3	67891.83	13	11	17	11	17	14	15	11	18	11	13	13	14	10	7	7	10	7	11	10	10	7	10	8	7	9	9	6	9	9	12	9	14	13	14	10	14	11	12	13	13	9
17	sp|P13796|PLSL_HUMAN	sp|P13796|PLSL_HUMAN Plastin-2 OS=Homo sapiens GN=LCP1 PE=1 SV=6	70814.11	29	16	28	17	26	15	21	18	23	15	19	18	19	17	5	5	7	6	6	5	5	6	7	5	6	6	6	5	5	5	7	6	6	5	5	6	7	5	6	6	6	5
17	sp|P13797|PLST_HUMAN	sp|P13797|PLST_HUMAN Plastin-3 OS=Homo sapiens GN=PLS3 PE=1 SV=4	71279.4	0	1	0	2	0	1	0	3	2	2	1	1	1	2	0	1	0	1	0	1	0	1	1	1	1	1	1	1	2	3	2	3	1	3	1	3	3	3	2	3	3	3
18	sp|P60981|DEST_HUMAN	sp|P60981|DEST_HUMAN Destrin OS=Homo sapiens GN=DSTN PE=1 SV=3	18949.65	8	9	7	10	7	11	7	8	7	10	10	9	8	11	5	4	3	6	3	6	4	4	4	5	4	4	4	6	5	4	3	6	3	6	4	4	4	5	4	4	4	6
18	sp|P23528|COF1_HUMAN	sp|P23528|COF1_HUMAN Cofilin-1 OS=Homo sapiens GN=CFL1 PE=1 SV=3	18718.74	15	16	16	17	16	17	21	17	17	17	20	17	18	17	2	3	3	3	3	3	3	3	3	3	3	3	3	3	3	4	4	4	4	4	4	4	4	4	4	4	4	4
19	sp|P21333|FLNA_HUMAN	sp|P21333|FLNA_HUMAN Filamin-A OS=Homo sapiens GN=FLNA PE=1 SV=4	283300.9	16	22	21	22	17	16	21	21	19	19	18	22	20	23	12	12	14	13	12	12	13	13	12	13	12	13	13	13	12	12	14	13	12	12	13	13	12	13	12	13	13	13
19	sp|O75369|FLNB_HUMAN	sp|O75369|FLNB_HUMAN Filamin-B OS=Homo sapiens GN=FLNB PE=1 SV=2	280156.87	6	4	5	6	4	5	6	5	5	4	6	5	6	8	6	4	5	5	4	4	5	5	5	4	6	5	5	7	7	6	7	8	5	7	7	6	6	5	7	6	6	8
19	sp|Q14315|FLNC_HUMAN	sp|Q14315|FLNC_HUMAN Filamin-C OS=Homo sapiens GN=FLNC PE=1 SV=3	293406.55	0	0	0	0	0	0	0	0	0	0	2	0	2	0	0	0	0	0	0	0	0	0	0	0	2	0	2	0	1	2	1	2	1	2	2	1	1	1	3	1	3	1
20	sp|P04406|G3P_HUMAN	sp|P04406|G3P_HUMAN Glyceraldehyde-3-phosphate dehydrogenase OS=Homo sapiens GN=GAPDH PE=1 SV=3	36201.46	21	17	19	17	20	15	21	19	20	17	21	16	17	15	6	5	6	5	5	5	6	5	5	5	6	5	5	5	6	5	6	5	5	5	6	5	5	5	6	5	5	5
21	sp|P14618|KPYM_HUMAN	sp|P14618|KPYM_HUMAN Pyruvate kinase PKM OS=Homo sapiens GN=PKM PE=1 SV=4	58470.24	19	13	20	9	22	13	24	12	21	14	24	12	23	15	6	4	5	4	7	4	6	5	7	5	5	5	5	5	6	4	5	4	7	4	6	5	7	5	5	5	5	5
22	sp|P00751|CFAB_HUMAN	sp|P00751|CFAB_HUMAN Complement factor B OS=Homo sapiens GN=CFB PE=1 SV=2	86847.04	23	12	24	12	24	8	20	10	21	13	26	11	20	12	8	8	9	5	9	5	7	5	8	7	9	8	9	7	8	8	9	5	9	5	7	5	8	7	9	8	9	7
23	sp|P00558|PGK1_HUMAN	sp|P00558|PGK1_HUMAN Phosphoglycerate kinase 1 OS=Homo sapiens GN=PGK1 PE=1 SV=3	44985.28	15	15	16	18	16	17	18	18	17	17	16	18	17	17	7	8	7	8	7	7	7	7	8	8	7	8	7	8	7	8	7	8	7	7	7	7	8	8	7	8	7	8
24	sp|Q01518|CAP1_HUMAN	sp|Q01518|CAP1_HUMAN Adenylyl cyclase-associated protein 1 OS=Homo sapiens GN=CAP1 PE=1 SV=5	52324.86	19	18	18	15	19	14	16	15	17	16	16	15	16	16	7	6	6	6	7	6	7	6	5	6	6	6	5	4	7	6	6	6	7	6	7	6	5	6	6	6	5	4
25	sp|P01009|A1AT_HUMAN	sp|P01009|A1AT_HUMAN Alpha-1-antitrypsin OS=Homo sapiens GN=SERPINA1 PE=1 SV=3	46878.08	15	15	16	17	17	13	14	15	16	17	18	17	16	15	6	6	6	7	7	6	6	6	7	7	7	6	6	7	6	6	6	7	7	6	6	6	7	7	7	6	6	7
26	sp|P14923|PLAK_HUMAN	sp|P14923|PLAK_HUMAN Junction plakoglobin OS=Homo sapiens GN=JUP PE=1 SV=3	82434.01	17	16	12	15	12	17	16	17	14	18	14	18	11	18	7	6	5	6	7	6	7	6	6	6	5	6	6	6	7	6	5	6	7	6	7	6	6	6	5	6	6	6
27	sp|P13639|EF2_HUMAN	sp|P13639|EF2_HUMAN Elongation factor 2 OS=Homo sapiens GN=EEF2 PE=1 SV=4	96246.31	13	11	15	17	15	16	18	15	14	17	12	20	13	14	8	6	9	6	8	7	8	7	8	6	8	7	8	7	8	6	9	6	8	7	8	7	8	6	8	7	8	7
28	sp|P31146|COR1A_HUMAN	sp|P31146|COR1A_HUMAN Coronin-1A OS=Homo sapiens GN=CORO1A PE=1 SV=4	51678.06	14	14	15	15	11	13	13	16	16	15	18	16	15	15	7	8	7	8	6	6	6	8	7	8	8	8	8	7	7	8	7	8	6	6	6	8	7	8	8	8	8	7
29	sp|P48594|SPB4_HUMAN	sp|P48594|SPB4_HUMAN Serpin B4 OS=Homo sapiens GN=SERPINB4 PE=1 SV=2	44996.54	12	16	16	15	14	12	16	14	13	13	17	15	13	13	4	4	4	4	4	4	4	4	4	4	4	4	4	4	4	4	4	4	4	4	4	4	4	4	4	4	4	4
30	sp|P60174|TPIS_HUMAN	sp|P60174|TPIS_HUMAN Triosephosphate isomerase OS=Homo sapiens GN=TPI1 PE=1 SV=3	31056.8	17	12	15	12	16	11	16	12	14	11	16	12	16	12	4	3	4	3	4	3	4	4	4	3	4	4	4	3	4	3	4	3	4	3	4	4	4	3	4	4	4	3
31	sp|P07237|PDIA1_HUMAN	sp|P07237|PDIA1_HUMAN Protein disulfide-isomerase OS=Homo sapiens GN=P4HB PE=1 SV=3	57479.82	10	13	9	14	8	16	13	18	13	18	12	17	11	13	6	8	5	8	7	8	9	10	8	10	8	10	7	8	6	8	5	8	7	8	9	10	8	10	8	10	7	8
32	sp|O60437|PEPL_HUMAN	sp|O60437|PEPL_HUMAN Periplakin OS=Homo sapiens GN=PPL PE=1 SV=4	205193.24	17	6	19	8	18	7	18	7	18	10	17	8	17	9	14	6	15	7	14	7	16	6	16	9	15	7	16	7	14	6	15	7	14	7	16	6	16	9	15	7	16	7
33	sp|Q8TDL5|BPIB1_HUMAN	sp|Q8TDL5|BPIB1_HUMAN BPI fold-containing family B member 1 OS=Homo sapiens GN=BPIFB1 PE=1 SV=1	52579.54	8	11	9	11	12	10	13	19	12	16	10	20	13	13	3	3	3	3	4	2	4	5	4	5	3	4	4	4	3	3	3	3	4	2	4	5	4	5	3	4	4	4
34	sp|P02647|APOA1_HUMAN	sp|P02647|APOA1_HUMAN Apolipoprotein A-I OS=Homo sapiens GN=APOA1 PE=1 SV=1	30758.93	13	12	11	13	13	12	15	12	13	14	14	12	14	8	6	5	7	6	7	5	7	6	8	7	6	5	6	4	6	5	7	6	7	5	7	6	8	7	6	5	6	4
35	sp|P98088|MUC5A_HUMAN	sp|P98088|MUC5A_HUMAN Mucin-5AC OS=Homo sapiens GN=MUC5AC PE=1 SV=4	601963.01	8	15	7	16	8	18	7	14	5	19	7	17	9	15	8	10	6	12	6	14	6	10	4	14	6	12	7	12	8	10	6	12	6	14	6	10	4	14	6	12	7	12
36	sp|Q13813|SPTN1_HUMAN	sp|Q13813|SPTN1_HUMAN Spectrin alpha chain, non-erythrocytic 1 OS=Homo sapiens GN=SPTAN1 PE=1 SV=3	285162.51	15	6	20	8	18	5	17	6	17	7	16	8	15	5	12	6	14	7	12	5	11	6	13	6	12	8	9	5	12	6	14	7	12	5	11	6	13	6	12	8	9	5
37	sp|Q9UGM3|DMBT1_HUMAN	sp|Q9UGM3|DMBT1_HUMAN Deleted in malignant brain tumors 1 protein OS=Homo sapiens GN=DMBT1 PE=1 SV=2	268038.62	11	11	14	10	13	11	10	15	11	13	9	13	11	9	4	4	4	3	4	4	4	4	4	5	4	5	4	3	4	4	4	3	4	4	4	4	4	5	4	5	4	3
38	sp|P06733|ENOA_HUMAN	sp|P06733|ENOA_HUMAN Alpha-enolase OS=Homo sapiens GN=ENO1 PE=1 SV=2	47481.45	15	10	12	12	11	10	12	11	13	13	11	11	8	12	6	5	6	5	5	4	5	5	6	4	5	4	4	4	6	5	6	5	5	4	5	5	6	4	5	4	4	4
39	sp|P14780|MMP9_HUMAN	sp|P14780|MMP9_HUMAN Matrix metalloproteinase-9 OS=Homo sapiens GN=MMP9 PE=1 SV=3	79491.76	13	10	12	9	11	10	13	12	15	10	12	11	12	9	6	5	6	5	7	5	7	6	6	6	6	6	6	6	6	5	6	5	7	5	7	6	6	6	6	6	6	6
40	sp|P01023|A2MG_HUMAN	sp|P01023|A2MG_HUMAN Alpha-2-macroglobulin OS=Homo sapiens GN=A2M PE=1 SV=3	164613.43	11	7	15	10	16	6	16	8	14	8	14	7	18	7	7	5	8	6	9	5	9	6	8	5	8	5	8	4	7	5	8	6	9	5	9	6	8	5	8	5	8	4
41	sp|P05164|PERM_HUMAN	sp|P05164|PERM_HUMAN Myeloperoxidase OS=Homo sapiens GN=MPO PE=1 SV=1	84784.2	8	16	8	15	7	17	7	12	10	14	6	15	5	15	5	8	4	8	3	6	4	6	7	8	4	7	3	7	5	8	4	8	3	6	4	6	7	8	4	7	3	7
42	sp|Q01469|FABP5_HUMAN	sp|Q01469|FABP5_HUMAN Fatty acid-binding protein, epidermal OS=Homo sapiens GN=FABP5 PE=1 SV=3	15496.68	13	12	12	10	10	12	8	13	12	13	8	12	8	10	5	5	4	4	4	4	3	4	4	4	3	4	3	3	5	5	4	4	4	4	3	4	4	4	3	4	3	3
43	sp|Q9HC84|MUC5B_HUMAN	sp|Q9HC84|MUC5B_HUMAN Mucin-5B OS=Homo sapiens GN=MUC5B PE=1 SV=3	611584.01	10	12	12	11	9	12	9	12	9	13	10	12	8	13	6	6	6	6	6	5	5	5	6	7	7	6	4	7	6	6	6	6	6	5	5	5	6	7	7	6	4	7
44	sp|P15259|PGAM2_HUMAN	sp|P15259|PGAM2_HUMAN Phosphoglycerate mutase 2 OS=Homo sapiens GN=PGAM2 PE=1 SV=3	28918.9	12	6	12	8	12	10	12	10	12	9	11	10	13	12	4	4	4	3	4	4	4	4	4	4	4	4	4	4	4	4	4	3	4	4	4	4	4	4	4	4	4	4
45	sp|P02751|FINC_HUMAN	sp|P02751|FINC_HUMAN Fibronectin OS=Homo sapiens GN=FN1 PE=1 SV=4	266052.46	14	4	17	4	13	3	20	7	16	5	17	6	16	6	10	4	13	4	9	2	13	6	13	5	14	6	11	5	10	4	13	4	9	2	13	6	13	5	14	6	11	5
46	sp|Q00610|CLH1_HUMAN	sp|Q00610|CLH1_HUMAN Clathrin heavy chain 1 OS=Homo sapiens GN=CLTC PE=1 SV=5	193260.19	15	10	13	7	13	4	14	8	15	6	12	11	13	6	11	9	10	7	11	4	10	6	11	5	11	7	9	5	11	9	10	7	11	4	10	6	11	5	11	7	9	5
47	sp|Q15149|PLEC_HUMAN	sp|Q15149|PLEC_HUMAN Plectin OS=Homo sapiens GN=PLEC PE=1 SV=3	533461.73	9	6	11	10	13	11	14	9	16	13	12	10	13	12	8	5	11	8	13	10	13	8	15	12	11	9	12	10	8	5	11	8	13	10	13	8	15	12	11	9	12	10
47	sp|P58107|EPIPL_HUMAN	sp|P58107|EPIPL_HUMAN Epiplakin OS=Homo sapiens GN=EPPK1 PE=1 SV=2	557673.87	0	0	0	0	0	0	0	0	0	1	0	2	0	1	0	0	0	0	0	0	0	0	0	1	0	2	0	1	1	1	1	1	1	1	1	1	1	2	1	3	1	2
48	sp|P08670|VIME_HUMAN	sp|P08670|VIME_HUMAN Vimentin OS=Homo sapiens GN=VIM PE=1 SV=4	53676.1	7	8	8	12	7	12	10	13	8	13	9	13	11	15	4	7	6	8	6	8	7	9	5	9	5	8	6	9	4	7	6	8	6	8	7	9	5	9	5	8	6	9
49	sp|P33778|H2B1B_HUMAN	sp|P33778|H2B1B_HUMAN Histone H2B type 1-B OS=Homo sapiens GN=HIST1H2BB PE=1 SV=2	13941.58	7	13	7	11	7	13	7	13	8	14	6	12	9	14	2	2	2	2	2	2	2	2	2	2	2	2	3	2	2	2	2	2	2	2	2	2	2	2	2	2	3	2
50	sp|O75083|WDR1_HUMAN	sp|O75083|WDR1_HUMAN WD repeat-containing protein 1 OS=Homo sapiens GN=WDR1 PE=1 SV=4	66836.13	12	8	9	9	12	8	9	10	11	9	10	11	11	11	7	7	6	7	8	6	6	6	7	7	7	8	7	8	7	7	6	7	8	6	6	6	7	7	7	8	7	8
51	sp|P02545|LMNA_HUMAN	sp|P02545|LMNA_HUMAN Prelamin-A/C OS=Homo sapiens GN=LMNA PE=1 SV=1	74379.81	10	11	9	10	10	8	11	11	8	11	11	11	9	9	7	7	7	6	7	7	7	6	6	7	8	6	7	7	7	7	7	6	7	7	7	6	6	7	8	6	7	7
52	sp|Q9Y490|TLN1_HUMAN	sp|Q9Y490|TLN1_HUMAN Talin-1 OS=Homo sapiens GN=TLN1 PE=1 SV=3	271765.86	14	9	12	8	12	10	10	9	9	5	11	7	7	10	12	7	11	8	9	7	8	7	8	4	9	5	6	8	12	7	11	8	9	7	8	7	8	4	9	5	6	8
53	sp|P37837|TALDO_HUMAN	sp|P37837|TALDO_HUMAN Transaldolase OS=Homo sapiens GN=TALDO1 PE=1 SV=2	37687.53	11	7	11	6	8	8	12	9	9	9	11	10	11	10	7	5	5	4	4	5	6	7	5	7	6	7	6	7	7	5	5	4	4	5	6	7	5	7	6	7	6	7
54	sp|P04792|HSPB1_HUMAN	sp|P04792|HSPB1_HUMAN Heat shock protein beta-1 OS=Homo sapiens GN=HSPB1 PE=1 SV=2	22825.51	6	9	9	10	7	11	8	9	8	10	8	11	7	12	3	3	3	3	3	3	3	3	3	3	3	3	3	3	3	3	3	3	3	3	3	3	3	3	3	3	3	3
55	sp|P31025|LCN1_HUMAN	sp|P31025|LCN1_HUMAN Lipocalin-1 OS=Homo sapiens GN=LCN1 PE=1 SV=1	19408.88	9	9	9	9	9	11	8	9	9	8	7	9	8	10	4	4	4	3	4	4	4	4	4	4	3	4	3	4	4	4	4	3	4	4	4	4	4	4	3	4	3	4
56	sp|Q9Y6R7|FCGBP_HUMAN	sp|Q9Y6R7|FCGBP_HUMAN IgGFc-binding protein OS=Homo sapiens GN=FCGBP PE=1 SV=3	596443.18	8	10	7	13	7	9	9	10	8	9	6	10	6	10	6	7	4	9	6	6	7	7	6	7	5	7	5	7	6	7	4	9	6	6	7	7	6	7	5	7	5	7
57	hCoV-19/Italy/INMI1-isl/2020|EPI_ISL_410545|2020-01-29_N	hCoV-19/Italy/INMI1-isl/2020|EPI_ISL_410545|2020-01-29_N	45598.02	0	0	1	1	3	3	8	6	12	12	15	15	23	22	0	0	1	1	3	3	4	3	5	7	7	7	7	7	0	0	1	1	3	3	4	3	5	7	7	7	7	7
58	sp|P0DMV8|HS71A_HUMAN	sp|P0DMV8|HS71A_HUMAN Heat shock 70 kDa protein 1A OS=Homo sapiens GN=HSPA1A PE=1 SV=1	70294.14	13	6	14	7	15	8	15	7	13	7	13	8	14	5	6	5	7	6	8	4	8	6	8	4	7	7	8	5	6	5	7	6	8	4	8	6	8	4	7	7	8	5
58	sp|P38646|GRP75_HUMAN	sp|P38646|GRP75_HUMAN Stress-70 protein, mitochondrial OS=Homo sapiens GN=HSPA9 PE=1 SV=2	73919.88	6	8	9	7	7	6	6	6	6	7	9	8	7	6	6	7	8	6	7	5	5	5	6	7	9	7	5	5	6	7	8	6	7	5	5	5	6	7	9	7	5	5
58	sp|P11142|HSP7C_HUMAN	sp|P11142|HSP7C_HUMAN Heat shock cognate 71 kDa protein OS=Homo sapiens GN=HSPA8 PE=1 SV=1	71082.31	6	4	9	5	8	8	7	5	7	7	11	6	7	6	5	2	5	3	5	3	5	3	5	3	5	4	4	4	7	4	7	5	7	5	7	4	7	5	7	6	6	6
59	sp|P00338|LDHA_HUMAN	sp|P00338|LDHA_HUMAN L-lactate dehydrogenase A chain OS=Homo sapiens GN=LDHA PE=1 SV=2	36950.47	8	5	8	6	7	10	11	9	8	9	10	6	9	6	5	3	5	4	4	6	4	5	5	6	5	4	5	4	5	3	5	4	4	6	4	5	5	6	5	4	5	4
60	sp|P18206|VINC_HUMAN	sp|P18206|VINC_HUMAN Vinculin OS=Homo sapiens GN=VCL PE=1 SV=4	124292.03	9	6	12	7	11	7	12	8	9	4	8	6	8	4	7	5	9	4	9	5	9	7	7	4	6	5	6	3	7	5	9	4	9	5	9	7	7	4	6	5	6	3
61	sp|P07476|INVO_HUMAN	sp|P07476|INVO_HUMAN Involucrin OS=Homo sapiens GN=IVL PE=1 SV=2	68551.25	9	8	9	8	8	9	7	7	6	8	8	8	7	8	3	3	3	6	3	3	2	3	2	5	3	5	4	6	5	5	5	6	5	5	4	5	4	6	5	6	4	6
62	sp|P05107|ITB2_HUMAN	sp|P05107|ITB2_HUMAN Integrin beta-2 OS=Homo sapiens GN=ITGB2 PE=1 SV=2	87976.35	5	10	6	10	5	8	4	12	4	11	7	11	7	9	4	6	4	5	3	4	2	7	3	6	4	7	3	4	4	6	4	5	3	4	2	7	3	6	4	7	3	4
63	sp|P61978|HNRPK_HUMAN	sp|P61978|HNRPK_HUMAN Heterogeneous nuclear ribonucleoprotein K OS=Homo sapiens GN=HNRNPK PE=1 SV=1	51229.51	8	6	8	7	6	8	8	8	10	6	7	8	8	9	4	3	5	2	3	4	4	4	4	3	3	5	4	4	4	3	5	2	3	4	4	4	4	3	3	5	4	4
64	sp|P06744|G6PI_HUMAN	sp|P06744|G6PI_HUMAN Glucose-6-phosphate isomerase OS=Homo sapiens GN=GPI PE=1 SV=4	63335.33	11	6	7	6	9	8	11	7	9	6	7	7	6	6	4	3	2	2	4	2	3	3	3	3	2	3	3	3	4	3	2	2	4	2	3	3	3	3	2	3	3	3
65	sp|P07195|LDHB_HUMAN	sp|P07195|LDHB_HUMAN L-lactate dehydrogenase B chain OS=Homo sapiens GN=LDHB PE=1 SV=2	36900.25	7	7	8	7	8	7	8	7	8	7	9	7	9	7	3	3	3	3	3	3	3	3	3	3	3	3	3	3	3	3	3	3	3	3	3	3	3	3	3	3	3	3
66	sp|Q14764|MVP_HUMAN	sp|Q14764|MVP_HUMAN Major vault protein OS=Homo sapiens GN=MVP PE=1 SV=4	99551.04	8	8	9	6	9	5	9	7	9	7	7	7	8	7	4	4	5	4	5	4	4	4	4	4	4	4	4	4	4	4	5	4	5	4	4	4	4	4	4	4	4	4
67	sp|P06702|S10A9_HUMAN	sp|P06702|S10A9_HUMAN Protein S100-A9 OS=Homo sapiens GN=S100A9 PE=1 SV=1	13290.53	5	6	5	5	6	6	6	4	6	4	17	7	23	5	1	1	1	1	1	1	1	1	1	1	2	2	2	1	1	1	1	1	1	1	1	1	1	1	2	2	2	1
68	sp|P40925|MDHC_HUMAN	sp|P40925|MDHC_HUMAN Malate dehydrogenase, cytoplasmic OS=Homo sapiens GN=MDH1 PE=1 SV=4	36631.11	7	7	7	7	7	9	9	6	7	9	9	6	8	7	4	4	4	3	4	5	5	4	5	5	5	4	4	4	4	4	4	3	4	5	5	4	5	5	5	4	4	4
69	sp|P07900|HS90A_HUMAN	sp|P07900|HS90A_HUMAN Heat shock protein HSP 90-alpha OS=Homo sapiens GN=HSP90AA1 PE=1 SV=5	85005.83	8	4	9	5	8	7	10	5	9	6	12	4	12	6	5	2	4	2	5	3	4	2	4	3	4	2	4	2	5	2	4	2	5	3	4	2	4	3	4	2	4	2
69	sp|P08238|HS90B_HUMAN	sp|P08238|HS90B_HUMAN Heat shock protein HSP 90-beta OS=Homo sapiens GN=HSP90AB1 PE=1 SV=4	83554.23	2	2	3	2	2	2	3	3	1	2	2	2	1	1	2	2	2	2	2	2	3	2	1	1	2	2	1	1	5	2	3	2	5	2	4	2	2	1	3	2	2	1
70	sp|P04264|K2C1_HUMAN	sp|P04264|K2C1_HUMAN Keratin, type II cytoskeletal 1 OS=Homo sapiens GN=KRT1 PE=1 SV=6	66170.07	5	8	6	9	7	7	6	7	6	7	6	9	6	8	1	1	1	1	1	1	1	1	1	1	1	1	1	1	1	1	1	1	1	1	1	1	1	1	1	1	1	1
71	sp|P02774|VTDB_HUMAN	sp|P02774|VTDB_HUMAN Vitamin D-binding protein OS=Homo sapiens GN=GC PE=1 SV=1	54525.63	5	7	7	8	5	6	7	8	7	10	6	10	4	6	3	4	4	5	4	4	5	5	5	7	4	6	4	4	3	4	4	5	4	4	5	5	5	7	4	6	4	4
72	sp|Q32MZ4|LRRF1_HUMAN	sp|Q32MZ4|LRRF1_HUMAN Leucine-rich repeat flightless-interacting protein 1 OS=Homo sapiens GN=LRRFIP1 PE=1 SV=2	89825.97	6	6	7	6	8	6	10	7	7	6	8	6	6	7	5	5	5	5	7	6	8	6	5	5	6	5	5	6	5	5	5	5	7	6	8	6	5	5	6	5	5	6
73	sp|P09651|ROA1_HUMAN	sp|P09651|ROA1_HUMAN Heterogeneous nuclear ribonucleoprotein A1 OS=Homo sapiens GN=HNRNPA1 PE=1 SV=5	38837.09	7	6	7	5	7	5	6	7	9	6	7	7	7	6	4	4	4	4	4	3	5	5	5	4	3	5	4	4	4	4	4	4	4	3	5	5	5	4	3	5	4	4
73	sp|P22626|ROA2_HUMAN	sp|P22626|ROA2_HUMAN Heterogeneous nuclear ribonucleoproteins A2/B1 OS=Homo sapiens GN=HNRNPA2B1 PE=1 SV=2	37463.75	7	6	7	6	5	7	7	7	7	9	7	6	5	6	3	3	3	3	3	3	3	3	3	5	3	3	3	3	3	3	3	3	4	3	4	4	4	5	3	4	3	3
74	sp|P31944|CASPE_HUMAN	sp|P31944|CASPE_HUMAN Caspase-14 OS=Homo sapiens GN=CASP14 PE=1 SV=2	27947.06	5	9	5	8	5	9	5	11	4	9	6	9	3	6	3	3	3	3	3	3	3	4	3	4	3	4	2	3	3	3	3	3	3	3	3	4	3	4	3	4	2	3
75	sp|P11215|ITAM_HUMAN	sp|P11215|ITAM_HUMAN Integrin alpha-M OS=Homo sapiens GN=ITGAM PE=1 SV=2	128410.01	2	11	2	6	4	10	4	12	5	12	3	10	3	10	2	8	2	5	3	7	3	8	4	8	2	6	3	6	2	8	2	5	3	7	3	8	4	8	2	6	3	6
76	sp|P11413|G6PD_HUMAN	sp|P11413|G6PD_HUMAN Glucose-6-phosphate 1-dehydrogenase OS=Homo sapiens GN=G6PD PE=1 SV=4	59675.16	5	9	6	5	6	7	9	8	7	6	7	8	5	6	5	6	5	4	5	4	7	5	5	4	5	6	4	3	5	6	5	4	5	4	7	5	5	4	5	6	4	3
77	sp|Q5VTE0|EF1A3_HUMAN	sp|Q5VTE0|EF1A3_HUMAN Putative elongation factor 1-alpha-like 3 OS=Homo sapiens GN=EEF1A1P5 PE=5 SV=1	50495.28	7	7	9	7	6	6	4	6	4	8	6	8	6	8	3	3	3	3	3	3	2	3	3	3	3	4	3	3	3	3	3	3	3	3	2	3	3	3	3	4	3	3
78	sp|P04083|ANXA1_HUMAN	sp|P04083|ANXA1_HUMAN Annexin A1 OS=Homo sapiens GN=ANXA1 PE=1 SV=2	38918.06	5	8	4	7	4	10	7	8	3	9	5	8	6	8	1	2	1	2	2	2	3	2	1	2	1	3	2	2	1	2	1	2	2	2	3	2	1	2	1	3	2	2
79	sp|Q08188|TGM3_HUMAN	sp|Q08188|TGM3_HUMAN Protein-glutamine gamma-glutamyltransferase E OS=Homo sapiens GN=TGM3 PE=1 SV=4	76925.71	3	7	4	7	4	8	7	10	5	11	5	10	4	7	2	5	3	4	3	4	4	5	4	6	4	5	3	4	2	5	3	4	3	4	4	5	4	6	4	5	3	4
80	sp|P06737|PYGL_HUMAN	sp|P06737|PYGL_HUMAN Glycogen phosphorylase, liver form OS=Homo sapiens GN=PYGL PE=1 SV=4	97486.18	7	5	9	6	4	6	11	4	9	5	8	4	8	3	4	5	5	5	4	5	7	4	5	5	5	3	6	3	4	5	5	5	4	5	7	4	5	5	5	3	6	3
80	sp|P11216|PYGB_HUMAN	sp|P11216|PYGB_HUMAN Glycogen phosphorylase, brain form OS=Homo sapiens GN=PYGB PE=1 SV=5	97318.78	1	3	2	1	2	3	2	2	3	3	3	1	2	3	1	3	2	1	2	3	2	2	3	3	3	1	2	3	1	4	3	1	2	4	4	3	4	5	4	1	4	3
81	sp|P0C0L5|CO4B_HUMAN	sp|P0C0L5|CO4B_HUMAN Complement C4-B OS=Homo sapiens GN=C4B PE=1 SV=2	194170.12	9	3	11	3	9	4	10	3	7	2	11	4	9	4	6	2	6	2	7	3	7	2	6	1	7	3	6	3	6	2	6	2	7	3	7	2	6	1	7	3	6	3
82	sp|P08246|ELNE_HUMAN	sp|P08246|ELNE_HUMAN Neutrophil elastase OS=Homo sapiens GN=ELANE PE=1 SV=1	29127.02	4	7	4	9	4	8	7	7	6	8	5	8	5	6	2	2	1	2	1	2	2	2	2	2	2	2	2	2	2	2	1	2	1	2	2	2	2	2	2	2	2	2
83	sp|P50552|VASP_HUMAN	sp|P50552|VASP_HUMAN Vasodilator-stimulated phosphoprotein OS=Homo sapiens GN=VASP PE=1 SV=3	39976.15	6	5	5	6	6	6	8	8	7	6	7	7	7	3	4	3	5	4	5	4	6	6	7	3	4	5	4	2	4	3	5	4	5	4	6	6	7	3	4	5	4	2
84	sp|P52566|GDIR2_HUMAN	sp|P52566|GDIR2_HUMAN Rho GDP-dissociation inhibitor 2 OS=Homo sapiens GN=ARHGDIB PE=1 SV=3	23030.63	7	6	7	5	6	5	6	6	7	6	6	6	6	6	3	3	3	3	3	3	3	3	3	3	3	3	3	3	3	3	3	3	3	3	3	3	3	3	3	3	3	3
85	sp|P08133|ANXA6_HUMAN	sp|P08133|ANXA6_HUMAN Annexin A6 OS=Homo sapiens GN=ANXA6 PE=1 SV=3	76167.7	5	12	5	9	6	9	4	6	6	8	1	6	1	7	4	6	4	6	4	6	3	5	4	5	1	4	1	5	4	6	4	6	4	6	3	5	4	5	1	4	1	5
86	sp|P22532|SPR2D_HUMAN	sp|P22532|SPR2D_HUMAN Small proline-rich protein 2D OS=Homo sapiens GN=SPRR2D PE=2 SV=2	8583.88	5	10	4	8	4	7	5	9	5	10	6	10	4	9	2	3	2	3	2	2	2	3	3	3	3	3	2	3	2	3	2	3	2	2	2	3	3	3	3	3	2	3
87	sp|P61586|RHOA_HUMAN	sp|P61586|RHOA_HUMAN Transforming protein RhoA OS=Homo sapiens GN=RHOA PE=1 SV=1	22096.2	7	6	7	4	6	5	4	5	8	5	7	5	9	5	3	4	3	1	3	2	2	3	4	3	3	3	3	3	3	4	3	1	3	2	2	3	4	3	3	3	3	3
88	sp|Q9UBC9|SPRR3_HUMAN	sp|Q9UBC9|SPRR3_HUMAN Small proline-rich protein 3 OS=Homo sapiens GN=SPRR3 PE=1 SV=2	18598.4	7	4	5	4	7	5	9	5	5	6	7	5	8	5	5	3	4	3	5	4	5	4	4	4	4	4	4	4	5	3	4	3	5	4	5	4	4	4	4	4	4	4
89	sp|P62805|H4_HUMAN	sp|P62805|H4_HUMAN Histone H4 OS=Homo sapiens GN=HIST1H4A PE=1 SV=2	11360.38	5	7	3	8	4	8	3	8	3	8	4	8	4	9	1	1	1	1	1	1	1	1	1	1	1	1	1	1	1	1	1	1	1	1	1	1	1	1	1	1	1	1
90	sp|O75874|IDHC_HUMAN	IDHC_HUMAN Isocitrate dehydrogenase	46914.62	9	4	7	3	7	4	7	4	7	4	8	5	8	5	4	3	4	2	3	3	3	3	4	2	3	3	4	3	4	3	4	2	3	3	3	3	4	2	3	3	4	3
91	sp|P19823|ITIH2_HUMAN	sp|P19823|ITIH2_HUMAN Inter-alpha-trypsin inhibitor heavy chain H2 OS=Homo sapiens GN=ITIH2 PE=1 SV=2	106852.78	7	4	8	6	7	4	7	4	7	3	8	4	7	5	4	3	5	4	5	3	4	4	5	2	5	3	5	3	4	3	5	4	5	3	4	4	5	2	5	3	5	3
92	sp|P10809|CH60_HUMAN	sp|P10809|CH60_HUMAN 60 kDa heat shock protein, mitochondrial OS=Homo sapiens GN=HSPD1 PE=1 SV=2	61187.45	5	7	5	6	6	7	4	5	7	7	6	6	3	6	4	4	4	4	4	5	4	3	4	4	4	4	3	4	4	4	4	4	4	5	4	3	4	4	4	4	3	4
93	sp|P54108|CRIS3_HUMAN	sp|P54108|CRIS3_HUMAN Cysteine-rich secretory protein 3 OS=Homo sapiens GN=CRISP3 PE=1 SV=1	28524.35	6	5	5	5	6	4	8	4	7	6	6	5	8	4	3	2	2	2	3	2	3	2	3	2	2	2	3	2	3	2	2	2	3	2	3	2	3	2	2	2	3	2
94	sp|Q96FQ6|S10AG_HUMAN	sp|Q96FQ6|S10AG_HUMAN Protein S100-A16 OS=Homo sapiens GN=S100A16 PE=1 SV=1	11850.99	6	4	8	3	7	4	8	3	8	5	6	4	8	4	2	1	2	1	3	1	3	1	2	2	2	2	3	1	2	1	2	1	3	1	3	1	2	2	2	2	3	1
95	sp|Q9UBG3|CRNN_HUMAN	sp|Q9UBG3|CRNN_HUMAN Cornulin OS=Homo sapiens GN=CRNN PE=1 SV=1	53729.73	2	5	6	7	3	6	8	6	6	5	6	7	6	5	2	4	4	6	3	3	7	4	6	3	6	5	5	4	2	4	4	6	3	3	7	4	6	3	6	5	5	4
96	sp|Q6P5S2|LEG1H_HUMAN	sp|Q6P5S2|LEG1H_HUMAN Protein LEG1 homolog OS=Homo sapiens GN=LEG1 PE=1 SV=2	38243.69	8	3	10	3	8	2	8	3	10	3	10	2	6	1	3	3	4	3	3	2	3	3	3	2	4	1	2	1	3	3	4	3	3	2	3	3	3	2	4	1	2	1
97	sp|Q14697|GANAB_HUMAN	sp|Q14697|GANAB_HUMAN Neutral alpha-glucosidase AB OS=Homo sapiens GN=GANAB PE=1 SV=3	107262.82	6	5	8	4	6	6	8	4	5	4	7	4	6	4	5	4	6	3	5	3	7	3	5	3	6	3	4	3	5	4	6	3	5	3	7	3	5	3	6	3	4	3
98	sp|Q6XPR3|RPTN_HUMAN	sp|Q6XPR3|RPTN_HUMAN Repetin OS=Homo sapiens GN=RPTN PE=1 SV=1	91304.39	2	6	2	10	2	9	2	11	3	9	2	6	1	10	2	5	2	9	2	7	2	9	3	8	2	5	1	8	2	5	2	9	2	7	2	9	3	8	2	5	1	8
99	sp|P06753|TPM3_HUMAN	sp|P06753|TPM3_HUMAN Tropomyosin alpha-3 chain OS=Homo sapiens GN=TPM3 PE=1 SV=2	32986.8	3	5	5	7	5	8	5	7	3	6	4	8	3	6	1	1	1	1	1	1	1	1	1	1	1	1	1	1	1	1	1	1	1	1	1	1	1	1	1	1	1	1
100	sp|Q16851|UGPA_HUMAN	sp|Q16851|UGPA_HUMAN UTP--glucose-1-phosphate uridylyltransferase OS=Homo sapiens GN=UGP2 PE=1 SV=5	57075.78	6	4	4	4	4	5	7	4	7	6	6	7	5	5	4	3	4	3	3	4	5	3	4	4	4	4	4	4	4	3	4	3	3	4	5	3	4	4	4	4	4	4
101	sp|P00450|CERU_HUMAN	sp|P00450|CERU_HUMAN Ceruloplasmin OS=Homo sapiens GN=CP PE=1 SV=1	122982.91	9	3	9	4	5	2	7	3	10	1	7	5	6	3	6	3	5	4	3	1	4	2	6	1	4	4	4	2	6	3	5	4	3	1	4	2	6	1	4	4	4	2
102	sp|Q08380|LG3BP_HUMAN	sp|Q08380|LG3BP_HUMAN Galectin-3-binding protein OS=Homo sapiens GN=LGALS3BP PE=1 SV=1	66201.63	7	4	7	6	8	1	4	5	8	5	6	7	3	2	3	2	4	3	5	1	3	4	4	2	4	4	3	2	3	2	4	3	5	1	3	4	4	2	4	4	3	2
103	sp|P27797|CALR_HUMAN	sp|P27797|CALR_HUMAN Calreticulin OS=Homo sapiens GN=CALR PE=1 SV=1	48282.89	5	6	7	4	4	5	6	5	4	5	4	7	5	5	2	2	3	2	2	2	2	3	2	3	2	3	2	3	2	2	3	2	2	2	2	3	2	3	2	3	2	3
104	sp|P06703|S10A6_HUMAN	sp|P06703|S10A6_HUMAN Protein S100-A6 OS=Homo sapiens GN=S100A6 PE=1 SV=1	10230.36	5	3	6	4	6	3	6	4	7	5	6	5	6	5	2	2	2	2	3	2	3	2	3	2	2	2	2	2	2	2	2	2	3	2	3	2	3	2	2	2	2	2
105	sp|Q13200|PSMD2_HUMAN	sp|Q13200|PSMD2_HUMAN 26S proteasome non-ATPase regulatory subunit 2 OS=Homo sapiens GN=PSMD2 PE=1 SV=3	100877.07	5	4	6	7	6	6	4	4	6	5	4	5	5	3	4	4	5	6	5	5	3	4	5	5	3	5	4	3	4	4	5	6	5	5	3	4	5	5	3	5	4	3
106	sp|P09960|LKHA4_HUMAN	sp|P09960|LKHA4_HUMAN Leukotriene A-4 hydrolase OS=Homo sapiens GN=LTA4H PE=1 SV=2	69868.47	6	4	6	3	6	3	7	4	7	4	7	4	5	4	1	2	2	1	2	1	2	1	2	1	2	1	1	2	1	2	2	1	2	1	2	1	2	1	2	1	1	2
107	sp|P02671|FIBA_HUMAN	sp|P02671|FIBA_HUMAN Fibrinogen alpha chain OS=Homo sapiens GN=FGA PE=1 SV=2	95655.69	6	4	6	4	6	4	7	4	5	3	5	6	7	3	4	2	4	2	4	2	3	2	4	2	4	3	4	2	4	2	4	2	4	2	3	2	4	2	4	3	4	2
108	sp|Q14210|LY6D_HUMAN	sp|Q14210|LY6D_HUMAN Lymphocyte antigen 6D OS=Homo sapiens GN=LY6D PE=1 SV=1	13847.93	3	5	6	5	4	5	4	5	5	6	6	6	5	5	2	2	2	2	2	2	2	2	2	2	2	2	2	2	2	2	2	2	2	2	2	2	2	2	2	2	2	2
109	sp|P01042|KNG1_HUMAN	sp|P01042|KNG1_HUMAN Kininogen-1 OS=Homo sapiens GN=KNG1 PE=1 SV=2	72995.56	6	2	7	3	7	2	8	4	4	4	6	4	8	4	4	1	5	2	5	2	5	3	3	3	4	3	4	3	4	1	5	2	5	2	5	3	3	3	4	3	4	3
110	sp|P04839|CY24B_HUMAN	sp|P04839|CY24B_HUMAN Cytochrome b-245 heavy chain OS=Homo sapiens GN=CYBB PE=1 SV=2	66205.93	5	5	4	6	5	4	5	6	5	5	4	5	4	6	3	4	2	4	3	3	3	4	3	4	3	4	3	4	3	4	2	4	3	3	3	4	3	4	3	4	3	4
111	sp|P40121|CAPG_HUMAN	sp|P40121|CAPG_HUMAN Macrophage-capping protein OS=Homo sapiens GN=CAPG PE=1 SV=2	38759.58	4	4	5	4	5	5	5	6	5	5	5	5	5	5	3	3	4	4	4	4	4	4	4	4	4	4	4	4	3	3	4	4	4	4	4	4	4	4	4	4	4	4
112	sp|P08603|CFAH_HUMAN	sp|P08603|CFAH_HUMAN Complement factor H OS=Homo sapiens GN=CFH PE=1 SV=4	143680.46	9	4	7	1	8	1	8	2	7	2	8	2	7	2	6	2	5	1	6	1	6	2	5	2	6	2	6	2	6	2	5	1	6	1	6	2	5	2	6	2	6	2
112	sp|Q03591|FHR1_HUMAN	sp|Q03591|FHR1_HUMAN Complement factor H-related protein 1 OS=Homo sapiens GN=CFHR1 PE=1 SV=2	38766.39	1	0	1	0	1	0	0	0	1	0	1	0	0	0	1	0	1	0	1	0	0	0	1	0	1	0	0	0	1	0	1	0	1	0	0	0	1	0	2	0	0	0
113	sp|P02679|FIBG_HUMAN	sp|P02679|FIBG_HUMAN Fibrinogen gamma chain OS=Homo sapiens GN=FGG PE=1 SV=3	52106.1	6	4	5	3	4	5	7	4	6	4	5	4	7	4	2	2	2	2	2	2	4	3	2	2	2	2	2	2	2	2	2	2	2	2	4	3	2	2	2	2	2	2
114	sp|Q9HCY8|S10AE_HUMAN	sp|Q9HCY8|S10AE_HUMAN Protein S100-A14 OS=Homo sapiens GN=S100A14 PE=1 SV=1	11825.82	3	6	2	6	3	6	3	6	3	6	3	8	5	8	2	2	1	2	2	2	2	2	2	2	2	2	2	2	2	2	1	2	2	2	2	2	2	2	2	2	2	2
115	sp|P04632|CPNS1_HUMAN	sp|P04632|CPNS1_HUMAN Calpain small subunit 1 OS=Homo sapiens GN=CAPNS1 PE=1 SV=1	28468.8	3	6	4	6	5	6	6	4	4	4	4	4	5	6	2	2	2	2	2	2	2	2	2	2	2	2	2	2	2	2	2	2	2	2	2	2	2	2	2	2	2	2
116	sp|P22735|TGM1_HUMAN	sp|P22735|TGM1_HUMAN Protein-glutamine gamma-glutamyltransferase K OS=Homo sapiens GN=TGM1 PE=1 SV=4	90528.62	4	4	5	5	4	4	5	5	4	7	4	5	4	5	4	4	5	5	4	4	5	5	4	6	4	5	4	5	4	4	5	5	4	4	5	5	4	6	4	5	4	5
117	sp|Q13867|BLMH_HUMAN	sp|Q13867|BLMH_HUMAN Bleomycin hydrolase OS=Homo sapiens GN=BLMH PE=1 SV=1	53155.26	2	5	1	7	2	6	5	6	1	7	3	9	2	8	2	4	1	4	2	4	4	5	1	5	3	6	2	6	2	4	1	4	2	4	4	5	1	5	3	6	2	6
118	sp|P20073|ANXA7_HUMAN	sp|P20073|ANXA7_HUMAN Annexin A7 OS=Homo sapiens GN=ANXA7 PE=1 SV=3	52990.86	3	4	3	7	2	5	3	6	3	5	5	8	4	7	3	4	3	4	2	3	3	4	3	4	4	4	4	4	3	4	3	4	2	3	3	4	3	4	4	4	4	4
119	sp|Q02413|DSG1_HUMAN	sp|Q02413|DSG1_HUMAN Desmoglein-1 OS=Homo sapiens GN=DSG1 PE=1 SV=2	114702.25	1	6	3	9	3	8	3	6	3	6	3	6	2	5	1	4	3	6	3	6	3	5	3	5	3	5	2	4	1	4	3	6	3	6	3	5	3	5	3	5	2	4
120	sp|P61158|ARP3_HUMAN	sp|P61158|ARP3_HUMAN Actin-related protein 3 OS=Homo sapiens GN=ACTR3 PE=1 SV=3	47797.15	4	4	4	5	5	6	3	7	4	5	3	5	3	5	3	2	3	3	3	3	2	3	3	3	2	3	2	3	3	2	3	3	3	3	2	3	3	3	2	3	2	3
121	sp|P46940|IQGA1_HUMAN	sp|P46940|IQGA1_HUMAN Ras GTPase-activating-like protein IQGAP1 OS=Homo sapiens GN=IQGAP1 PE=1 SV=1	189761.03	5	3	6	4	4	4	5	2	4	6	6	5	5	3	4	3	5	4	3	4	4	2	4	6	4	5	3	3	4	3	5	4	3	4	4	2	4	6	4	5	3	3
121	sp|Q13576|IQGA2_HUMAN	sp|Q13576|IQGA2_HUMAN Ras GTPase-activating-like protein IQGAP2 OS=Homo sapiens GN=IQGAP2 PE=1 SV=4	181035.69	0	0	0	0	1	0	1	0	0	0	0	0	1	0	0	0	0	0	1	0	1	0	0	0	0	0	1	0	0	1	0	1	2	1	1	0	0	1	0	1	1	1
122	sp|P02675|FIBB_HUMAN	sp|P02675|FIBB_HUMAN Fibrinogen beta chain OS=Homo sapiens GN=FGB PE=1 SV=2	56576.52	7	6	7	5	6	2	3	3	8	4	3	4	2	2	2	2	2	2	2	1	1	2	2	2	2	2	1	1	2	2	2	2	2	1	1	2	2	2	2	2	1	1
123	sp|P52209|6PGD_HUMAN	sp|P52209|6PGD_HUMAN 6-phosphogluconate dehydrogenase, decarboxylating OS=Homo sapiens GN=PGD PE=1 SV=3	53619.15	4	5	3	4	5	5	5	6	3	5	5	4	5	3	3	3	3	3	3	3	3	3	3	3	3	3	3	3	3	3	3	3	3	3	3	3	3	3	3	3	3	3
124	sp|Q6UWP8|SBSN_HUMAN	sp|Q6UWP8|SBSN_HUMAN Suprabasin OS=Homo sapiens GN=SBSN PE=1 SV=2	60561.62	2	7	1	8	0	5	2	9	0	6	2	9	3	6	2	7	1	6	0	4	2	6	0	4	2	7	3	4	2	7	1	6	0	4	2	6	0	4	2	7	3	4
125	sp|P30740|ILEU_HUMAN	sp|P30740|ILEU_HUMAN Leukocyte elastase inhibitor OS=Homo sapiens GN=SERPINB1 PE=1 SV=1	42828.74	5	4	5	4	5	4	4	4	4	4	4	4	4	5	2	2	2	2	2	2	1	2	2	2	1	2	1	2	2	2	2	2	2	2	1	2	2	2	1	2	1	2
126	sp|P47929|LEG7_HUMAN	sp|P47929|LEG7_HUMAN Galectin-7 OS=Homo sapiens GN=LGALS7 PE=1 SV=2	15122.82	3	5	3	8	4	6	3	5	3	5	2	6	3	4	1	2	1	2	2	2	2	1	2	2	1	3	1	2	1	2	1	2	2	2	2	1	2	2	1	3	1	2
127	sp|P48735|IDHP_HUMAN	IDHP_HUMAN Isocitrate dehydrogenase	51333.04	5	5	4	4	3	3	4	5	4	4	4	5	4	5	3	3	3	3	2	2	3	3	3	3	3	3	3	3	3	3	3	3	2	2	3	3	3	3	3	3	3	3
128	sp|Q96DA0|ZG16B_HUMAN	sp|Q96DA0|ZG16B_HUMAN Zymogen granule protein 16 homolog B OS=Homo sapiens GN=ZG16B PE=1 SV=3	22724.57	1	3	3	4	4	1	4	7	2	7	3	8	5	7	1	1	1	1	1	1	1	1	1	1	1	1	1	1	1	1	1	1	1	1	1	1	1	1	1	1	1	1
129	sp|P26583|HMGB2_HUMAN	sp|P26583|HMGB2_HUMAN High mobility group protein B2 OS=Homo sapiens GN=HMGB2 PE=1 SV=2	24189.79	2	7	2	6	2	7	3	6	1	7	3	6	2	5	1	4	1	2	1	2	2	4	1	4	2	3	2	2	1	4	1	2	1	2	2	4	1	4	2	3	2	2
130	sp|Q14974|IMB1_HUMAN	sp|Q14974|IMB1_HUMAN Importin subunit beta-1 OS=Homo sapiens GN=KPNB1 PE=1 SV=2	98419.51	4	5	4	4	6	5	3	3	4	4	4	4	4	4	3	3	3	2	4	3	3	2	3	3	3	3	3	3	3	3	3	2	4	3	3	2	3	3	3	3	3	3
131	sp|P11021|GRP78_HUMAN	sp|P11021|GRP78_HUMAN 78 kDa glucose-regulated protein OS=Homo sapiens GN=HSPA5 PE=1 SV=2	72402.48	4	2	5	2	6	4	5	3	6	3	4	3	8	3	3	2	4	2	4	3	4	3	5	3	4	3	5	2	3	2	4	2	4	3	4	3	5	3	4	3	5	2
132	sp|P06748|NPM_HUMAN	sp|P06748|NPM_HUMAN Nucleophosmin OS=Homo sapiens GN=NPM1 PE=1 SV=2	32725.91	5	5	4	6	5	3	3	4	3	5	4	7	0	3	2	2	2	3	2	2	2	2	1	2	2	4	0	2	2	2	2	3	2	2	2	2	1	2	2	4	0	2
133	sp|P61247|RS3A_HUMAN	sp|P61247|RS3A_HUMAN 40S ribosomal protein S3a OS=Homo sapiens GN=RPS3A PE=1 SV=2	30153.82	5	5	4	4	3	4	3	3	2	5	4	4	5	6	3	2	3	2	2	3	2	3	1	3	3	2	3	2	3	2	3	2	2	3	2	3	1	3	3	2	3	2
134	sp|Q9P2E9|RRBP1_HUMAN	sp|Q9P2E9|RRBP1_HUMAN Ribosome-binding protein 1 OS=Homo sapiens GN=RRBP1 PE=1 SV=4	152779.82	9	1	6	0	7	1	6	3	8	1	6	1	6	2	8	1	6	0	6	1	5	3	7	1	5	1	6	2	8	1	6	0	6	1	5	3	7	1	5	1	6	2
135	sp|Q09666|AHNK_HUMAN	sp|Q09666|AHNK_HUMAN Neuroblast differentiation-associated protein AHNAK OS=Homo sapiens GN=AHNAK PE=1 SV=2	629212.58	6	3	5	3	4	3	7	2	4	3	8	3	4	2	4	2	2	2	2	2	5	2	3	2	5	3	3	2	4	2	3	2	3	2	5	2	3	3	5	3	3	2
136	sp|P28799|GRN_HUMAN	sp|P28799|GRN_HUMAN Granulins OS=Homo sapiens GN=GRN PE=1 SV=2	68517.73	4	1	6	1	5	2	5	4	6	3	7	4	6	3	4	1	5	1	5	2	5	4	6	3	6	4	6	3	4	1	5	1	5	2	5	4	6	3	6	4	6	3
137	sp|P26447|S10A4_HUMAN	sp|P26447|S10A4_HUMAN Protein S100-A4 OS=Homo sapiens GN=S100A4 PE=1 SV=1	11948.82	4	3	5	3	4	3	5	4	4	4	5	4	5	3	3	1	3	1	3	1	3	1	3	1	2	2	2	1	3	1	3	1	3	1	3	1	3	1	2	2	2	1
138	sp|P27824|CALX_HUMAN	sp|P27824|CALX_HUMAN Calnexin OS=Homo sapiens GN=CANX PE=1 SV=2	67982.02	2	6	2	6	1	6	2	4	4	6	3	6	2	6	2	3	2	3	1	3	2	3	4	4	3	4	2	3	2	3	2	3	1	3	2	3	4	4	3	4	2	3
139	sp|P40926|MDHM_HUMAN	sp|P40926|MDHM_HUMAN Malate dehydrogenase, mitochondrial OS=Homo sapiens GN=MDH2 PE=1 SV=3	35936.9	3	3	4	4	4	5	4	4	4	3	5	3	6	3	3	2	4	3	3	4	2	4	3	2	3	3	4	2	3	2	4	3	3	4	2	4	3	2	3	3	4	2
140	sp|P12429|ANXA3_HUMAN	sp|P12429|ANXA3_HUMAN Annexin A3 OS=Homo sapiens GN=ANXA3 PE=1 SV=3	36523.72	4	5	3	4	4	3	4	4	3	5	4	4	4	4	3	4	2	4	3	3	3	3	3	3	3	3	3	3	3	4	2	4	3	3	3	3	3	3	3	3	3	3
141	sp|Q00839|HNRPU_HUMAN	sp|Q00839|HNRPU_HUMAN Heterogeneous nuclear ribonucleoprotein U OS=Homo sapiens GN=HNRNPU PE=1 SV=6	91269.28	3	3	6	4	4	4	6	3	3	3	4	3	5	4	3	3	5	4	4	3	5	3	3	3	4	3	4	4	3	3	5	4	4	3	5	3	3	3	4	3	4	4
142	sp|Q96TA1|NIBL1_HUMAN	sp|Q96TA1|NIBL1_HUMAN Niban-like protein 1 OS=Homo sapiens GN=FAM129B PE=1 SV=3	84597.92	2	4	4	5	4	3	5	3	4	4	7	4	2	4	2	4	3	4	3	3	5	3	4	4	6	4	2	4	2	4	3	4	3	3	5	3	4	4	6	4	2	4
143	sp|P10909|CLUS_HUMAN	sp|P10909|CLUS_HUMAN Clusterin OS=Homo sapiens GN=CLU PE=1 SV=1	53031.22	4	3	4	2	5	3	4	5	3	5	5	3	4	5	4	1	4	2	4	1	3	3	2	3	4	3	3	3	4	1	4	2	4	1	3	3	2	3	4	3	3	3
144	sp|P29034|S10A2_HUMAN	sp|P29034|S10A2_HUMAN Protein S100-A2 OS=Homo sapiens GN=S100A2 PE=1 SV=3	11337.44	2	5	3	4	3	5	2	6	2	8	2	7	0	5	1	2	2	2	2	3	1	3	1	3	1	3	0	2	1	2	2	2	2	3	1	3	1	3	1	3	0	2
145	sp|P07737|PROF1_HUMAN	sp|P07737|PROF1_HUMAN Profilin-1 OS=Homo sapiens GN=PFN1 PE=1 SV=2	15215.62	4	4	5	4	4	5	4	4	3	4	4	3	3	3	2	2	2	2	2	2	2	2	2	2	2	2	2	2	2	2	2	2	2	2	2	2	2	2	2	2	2	2
146	sp|Q02878|RL6_HUMAN	sp|Q02878|RL6_HUMAN 60S ribosomal protein L6 OS=Homo sapiens GN=RPL6 PE=1 SV=3	32764.65	1	5	4	6	1	5	3	5	3	7	1	6	2	4	1	5	4	5	1	4	3	4	3	6	1	5	2	3	1	5	4	5	1	4	3	4	3	6	1	5	2	3
147	sp|Q14204|DYHC1_HUMAN	sp|Q14204|DYHC1_HUMAN Cytoplasmic dynein 1 heavy chain 1 OS=Homo sapiens GN=DYNC1H1 PE=1 SV=5	534808.87	8	3	5	3	2	1	5	5	4	3	4	3	4	3	8	3	5	3	2	1	4	5	4	3	4	3	4	3	8	3	5	3	2	1	4	5	4	3	4	3	4	3
148	sp|P49368|TCPG_HUMAN	sp|P49368|TCPG_HUMAN T-complex protein 1 subunit gamma OS=Homo sapiens GN=CCT3 PE=1 SV=4	61065.53	3	3	4	2	5	3	6	2	5	5	6	3	4	2	3	3	3	2	4	3	4	2	3	4	4	3	4	2	3	3	3	2	4	3	4	2	3	4	4	3	4	2
149	sp|P30153|2AAA_HUMAN	sp|P30153|2AAA_HUMAN Serine/threonine-protein phosphatase 2A 65 kDa regulatory subunit A alpha isoform OS=Homo sapiens GN=PPP2R1A PE=1 SV=4	66065.21	3	3	3	5	4	4	4	3	3	4	3	4	5	4	3	2	3	4	3	3	4	2	3	3	3	3	5	2	3	2	3	4	3	3	4	2	3	3	3	3	5	2
150	sp|P04003|C4BPA_HUMAN	sp|P04003|C4BPA_HUMAN C4b-binding protein alpha chain OS=Homo sapiens GN=C4BPA PE=1 SV=2	69042.17	3	3	6	3	3	3	6	2	6	3	6	2	5	1	3	3	3	3	2	3	3	2	3	3	2	2	2	1	3	3	3	3	2	3	3	2	3	3	2	2	2	1
151	sp|P60953|CDC42_HUMAN	sp|P60953|CDC42_HUMAN Cell division control protein 42 homolog OS=Homo sapiens GN=CDC42 PE=1 SV=2	21587.15	3	3	5	4	4	4	4	3	4	3	4	3	3	3	2	2	2	2	2	2	2	2	2	2	2	2	2	2	2	2	2	2	2	2	2	2	2	2	2	2	2	2
152	sp|P27105|STOM_HUMAN	sp|P27105|STOM_HUMAN Erythrocyte band 7 integral membrane protein OS=Homo sapiens GN=STOM PE=1 SV=3	31881.8	2	5	2	6	3	5	2	3	1	3	3	6	4	4	1	3	1	3	2	2	2	3	1	2	2	3	2	2	1	3	1	3	2	2	2	3	1	2	2	3	2	2
153	sp|P30101|PDIA3_HUMAN	sp|P30101|PDIA3_HUMAN Protein disulfide-isomerase A3 OS=Homo sapiens GN=PDIA3 PE=1 SV=4	57145.9	2	4	2	5	2	4	1	6	3	5	2	5	2	6	1	2	1	2	2	1	1	2	2	2	2	3	1	2	1	2	1	2	2	1	1	2	2	2	2	3	1	2
154	sp|Q92817|EVPL_HUMAN	sp|Q92817|EVPL_HUMAN Envoplakin OS=Homo sapiens GN=EVPL PE=1 SV=3	232774.48	4	2	4	4	5	3	7	1	4	2	2	4	4	3	4	2	4	4	4	3	6	1	4	2	2	4	4	3	4	2	4	4	4	3	6	1	4	2	2	4	4	3
155	sp|P40394|ADH7_HUMAN	sp|P40394|ADH7_HUMAN Alcohol dehydrogenase class 4 mu/sigma chain OS=Homo sapiens GN=ADH7 PE=1 SV=2	42252.57	4	3	3	4	4	4	4	3	4	3	3	3	3	4	2	2	2	2	2	2	2	2	2	2	2	2	2	2	2	2	2	2	2	2	2	2	2	2	2	2	2	2
156	sp|P55786|PSA_HUMAN	sp|P55786|PSA_HUMAN Puromycin-sensitive aminopeptidase OS=Homo sapiens GN=NPEPPS PE=1 SV=2	103894.99	5	3	4	3	4	4	3	4	4	2	4	3	4	4	4	2	3	3	4	3	3	4	4	2	3	3	4	4	4	2	3	3	4	3	3	4	4	2	3	3	4	4
157	sp|P51572|BAP31_HUMAN	sp|P51572|BAP31_HUMAN B-cell receptor-associated protein 31 OS=Homo sapiens GN=BCAP31 PE=1 SV=3	28031.03	3	2	3	4	4	3	3	4	4	6	3	4	3	2	3	2	3	3	4	2	3	4	4	5	3	4	3	2	3	2	3	3	4	2	3	4	4	5	3	4	3	2
158	sp|P23381|SYWC_HUMAN	sp|P23381|SYWC_HUMAN Tryptophan--tRNA ligase, cytoplasmic OS=Homo sapiens GN=WARS PE=1 SV=2	53473.74	5	1	5	1	5	1	5	2	6	2	7	2	5	1	3	1	3	1	3	1	3	1	3	1	3	1	3	1	3	1	3	1	3	1	3	1	3	1	3	1	3	1
159	sp|P01860|IGHG3_HUMAN	sp|P01860|IGHG3_HUMAN Ig gamma-3 chain C region OS=Homo sapiens GN=IGHG3 PE=1 SV=2	42286.75	5	2	5	1	4	2	5	2	6	2	5	2	4	2	2	1	2	1	2	1	2	1	2	1	2	1	2	1	2	1	2	1	2	1	2	1	2	1	2	1	2	1
160	sp|P08575|PTPRC_HUMAN	sp|P08575|PTPRC_HUMAN Receptor-type tyrosine-protein phosphatase C OS=Homo sapiens GN=PTPRC PE=1 SV=2	148644.37	2	3	2	5	1	5	1	7	1	5	2	6	2	5	2	3	2	3	1	4	1	5	1	4	2	4	2	3	2	3	2	3	1	4	1	5	1	4	2	4	2	3
161	sp|O14745|NHRF1_HUMAN	sp|O14745|NHRF1_HUMAN Na(+)/H(+) exchange regulatory cofactor NHE-RF1 OS=Homo sapiens GN=SLC9A3R1 PE=1 SV=4	39129.72	2	3	5	4	2	3	4	5	2	4	2	5	3	3	2	3	3	4	2	3	3	4	2	4	2	4	3	3	2	3	3	4	2	3	3	4	2	4	2	4	3	3
162	sp|P17931|LEG3_HUMAN	sp|P17931|LEG3_HUMAN Galectin-3 OS=Homo sapiens GN=LGALS3 PE=1 SV=5	26193.07	4	4	4	5	2	2	3	4	4	4	2	3	3	3	4	4	3	4	2	2	3	4	4	4	2	3	3	3	4	4	3	4	2	2	3	4	4	4	2	3	3	3
163	sp|Q6ZN66|GBP6_HUMAN	sp|Q6ZN66|GBP6_HUMAN Guanylate-binding protein 6 OS=Homo sapiens GN=GBP6 PE=2 SV=1	72894.04	4	4	3	4	3	4	4	2	3	4	2	3	4	3	4	4	3	4	3	4	4	2	3	4	2	3	4	3	4	4	3	4	3	4	4	2	3	4	2	3	4	3
164	sp|P22061|PIMT_HUMAN	sp|P22061|PIMT_HUMAN Protein-L-isoaspartate(D-aspartate) O-methyltransferase OS=Homo sapiens GN=PCMT1 PE=1 SV=4	24791.64	5	3	4	3	2	3	3	4	3	4	3	3	4	3	2	2	2	2	2	2	2	2	2	2	2	2	2	2	2	2	2	2	2	2	2	2	2	2	2	2	2	2
165	sp|Q96G03|PGM2_HUMAN	sp|Q96G03|PGM2_HUMAN Phosphoglucomutase-2 OS=Homo sapiens GN=PGM2 PE=1 SV=4	68753.59	4	1	4	2	4	4	4	1	4	5	4	4	4	2	2	1	2	1	3	2	2	1	2	2	2	2	2	1	2	1	2	1	3	2	2	1	2	2	2	2	2	1
166	sp|Q6ZVX7|FBX50_HUMAN	sp|Q6ZVX7|FBX50_HUMAN F-box only protein 50 OS=Homo sapiens GN=NCCRP1 PE=1 SV=1	30941.92	3	3	3	4	2	2	3	3	4	4	4	4	4	3	1	1	1	2	1	1	1	2	2	2	2	2	2	2	1	1	1	2	1	1	1	2	2	2	2	2	2	2
167	sp|P55072|TERA_HUMAN	sp|P55072|TERA_HUMAN Transitional endoplasmic reticulum ATPase OS=Homo sapiens GN=VCP PE=1 SV=4	89949.98	2	1	4	2	3	3	6	3	6	5	2	3	2	4	2	1	3	2	3	3	4	3	5	4	1	3	2	3	2	1	3	2	4	3	4	3	5	4	1	3	2	3
168	sp|P25815|S100P_HUMAN	sp|P25815|S100P_HUMAN Protein S100-P OS=Homo sapiens GN=S100P PE=1 SV=2	10450.24	4	3	2	3	4	3	4	2	4	3	4	3	4	3	1	1	1	1	1	1	1	1	1	1	1	1	1	1	1	1	1	1	1	1	1	1	1	1	1	1	1	1
169	sp|Q6UWW0|LCN15_HUMAN	sp|Q6UWW0|LCN15_HUMAN Lipocalin-15 OS=Homo sapiens GN=LCN15 PE=1 SV=1	20612.14	3	4	2	4	3	4	4	4	3	4	3	2	2	3	2	2	2	2	2	2	3	2	2	2	2	2	2	2	2	2	2	2	2	2	3	2	2	2	2	2	2	2
170	sp|Q9ULV4|COR1C_HUMAN	sp|Q9ULV4|COR1C_HUMAN Coronin-1C OS=Homo sapiens GN=CORO1C PE=1 SV=1	53899.32	4	5	3	4	2	5	2	2	3	5	2	4	2	2	4	5	3	4	2	4	2	2	3	5	2	4	2	2	4	5	3	4	2	4	2	2	3	5	2	4	2	2
171	sp|Q99798|ACON_HUMAN	sp|Q99798|ACON_HUMAN Aconitate hydratase, mitochondrial OS=Homo sapiens GN=ACO2 PE=1 SV=2	86113.2	3	3	3	2	4	4	6	1	5	3	4	2	3	2	2	2	2	2	2	3	3	1	3	2	2	2	1	2	2	2	2	2	2	3	3	1	3	2	2	2	1	2
172	sp|P53618|COPB_HUMAN	sp|P53618|COPB_HUMAN Coatomer subunit beta OS=Homo sapiens GN=COPB1 PE=1 SV=3	108214.18	4	2	3	3	4	2	2	3	4	3	5	3	4	3	2	2	2	2	3	2	1	3	3	2	3	2	2	2	2	2	2	2	3	2	1	3	3	2	3	2	2	2
173	sp|P19338|NUCL_HUMAN	sp|P19338|NUCL_HUMAN Nucleolin OS=Homo sapiens GN=NCL PE=1 SV=3	76625.38	5	2	2	4	4	2	4	3	5	2	2	4	2	3	3	1	2	2	3	1	2	2	3	1	2	2	2	1	3	1	2	2	3	1	2	2	3	1	2	2	2	1
174	sp|P62158|CALM_HUMAN	sp|P62158|CALM_HUMAN Calmodulin OS=Homo sapiens GN=CALM1 PE=1 SV=2	16826.83	5	2	6	4	3	4	5	3	4	3	1	4	0	4	2	2	4	2	2	3	2	2	3	2	1	2	0	3	2	2	4	2	2	3	2	2	3	2	1	2	0	3
174	sp|P27482|CALL3_HUMAN	sp|P27482|CALL3_HUMAN Calmodulin-like protein 3 OS=Homo sapiens GN=CALML3 PE=1 SV=2	16936.97	0	4	0	3	2	5	2	3	2	4	0	4	0	4	0	2	0	3	1	3	1	2	1	2	0	2	0	3	0	2	1	3	1	4	1	2	2	3	1	2	0	4
175	sp|P62258|1433E_HUMAN	sp|P62258|1433E_HUMAN 14-3-3 protein epsilon OS=Homo sapiens GN=YWHAE PE=1 SV=1	29326.48	2	2	4	4	4	2	5	3	3	3	2	2	4	3	2	2	3	3	4	1	5	3	2	3	2	2	3	3	2	2	3	3	4	1	5	3	2	3	2	2	3	3
176	sp|P13498|CY24A_HUMAN	sp|P13498|CY24A_HUMAN Cytochrome b-245 light chain OS=Homo sapiens GN=CYBA PE=1 SV=3	21113.18	4	3	2	3	1	3	3	4	1	5	1	4	3	5	1	1	1	1	1	1	1	1	1	1	1	1	1	1	1	1	1	1	1	1	1	1	1	1	1	1	1	1
177	sp|P01871|IGHM_HUMAN	sp|P01871|IGHM_HUMAN Ig mu chain C region OS=Homo sapiens GN=IGHM PE=1 SV=3	49959.79	3	2	2	2	5	3	5	3	4	2	2	3	5	1	1	2	1	1	3	2	3	1	3	1	1	1	2	1	1	2	1	1	3	2	3	1	3	1	1	1	2	1
178	sp|P05023|AT1A1_HUMAN	sp|P05023|AT1A1_HUMAN Sodium/potassium-transporting ATPase subunit alpha-1 OS=Homo sapiens GN=ATP1A1 PE=1 SV=1	114135.37	3	2	4	1	3	0	5	1	5	2	6	3	5	2	3	2	4	1	3	0	5	1	5	2	6	3	4	2	3	2	4	1	3	0	5	1	5	2	6	3	4	2
179	sp|P80511|S10AC_HUMAN	sp|P80511|S10AC_HUMAN Protein S100-A12 OS=Homo sapiens GN=S100A12 PE=1 SV=2	10568.53	3	3	3	2	3	3	3	2	3	3	2	3	5	3	2	2	2	1	2	2	2	1	2	2	1	2	3	2	2	2	2	1	2	2	2	1	2	2	1	2	3	2
180	sp|P52895|AK1C2_HUMAN	sp|P52895|AK1C2_HUMAN Aldo-keto reductase family 1 member C2 OS=Homo sapiens GN=AKR1C2 PE=1 SV=3	37111.11	3	2	4	5	3	3	3	2	3	4	3	1	3	2	2	1	2	2	2	2	2	2	2	2	2	1	2	1	2	1	2	2	2	2	2	2	2	2	2	1	2	1
181	sp|P07355|ANXA2_HUMAN	sp|P07355|ANXA2_HUMAN Annexin A2 OS=Homo sapiens GN=ANXA2 PE=1 SV=2	38807.9	2	3	3	2	3	3	2	3	3	3	4	3	3	4	1	2	2	1	1	2	1	2	2	2	2	2	2	2	1	2	2	1	1	2	1	2	2	2	2	2	2	2
182	sp|Q8WUM4|PDC6I_HUMAN	sp|Q8WUM4|PDC6I_HUMAN Programmed cell death 6-interacting protein OS=Homo sapiens GN=PDCD6IP PE=1 SV=1	96590.36	2	3	5	1	4	3	5	1	4	2	4	1	3	3	2	2	4	1	3	1	4	1	3	1	3	1	2	1	2	2	4	1	3	1	4	1	3	1	3	1	2	1
183	sp|P25786|PSA1_HUMAN	sp|P25786|PSA1_HUMAN Proteasome subunit alpha type-1 OS=Homo sapiens GN=PSMA1 PE=1 SV=1	29821.97	1	2	4	3	1	2	3	4	2	4	2	5	4	3	1	2	2	3	1	1	2	3	2	3	2	4	3	3	1	2	2	3	1	1	2	3	2	3	2	4	3	3
184	sp|O15145|ARPC3_HUMAN	sp|O15145|ARPC3_HUMAN Actin-related protein 2/3 complex subunit 3 OS=Homo sapiens GN=ARPC3 PE=1 SV=3	20761.46	3	4	4	4	2	4	2	2	2	2	2	2	2	5	2	2	2	2	1	2	1	1	1	2	1	1	1	2	2	2	2	2	1	2	1	1	1	2	1	1	1	2
185	sp|P35321|SPR1A_HUMAN	sp|P35321|SPR1A_HUMAN Cornifin-A OS=Homo sapiens GN=SPRR1A PE=1 SV=2	10327.05	4	2	6	6	3	4	3	3	5	5	7	3	6	5	2	1	2	3	2	2	2	2	2	2	2	2	2	2	2	1	2	3	2	2	2	2	2	2	2	2	2	2
186	sp|P48643|TCPE_HUMAN	sp|P48643|TCPE_HUMAN T-complex protein 1 subunit epsilon OS=Homo sapiens GN=CCT5 PE=1 SV=1	60088.98	2	2	3	2	3	2	3	4	3	3	4	3	4	2	2	1	2	1	2	1	2	3	3	2	3	2	3	1	2	1	2	1	2	1	2	3	3	2	3	2	3	1
187	sp|P20061|TCO1_HUMAN	sp|P20061|TCO1_HUMAN Transcobalamin-1 OS=Homo sapiens GN=TCN1 PE=1 SV=2	48689.21	3	3	4	2	4	3	3	2	4	2	3	2	3	2	1	1	1	1	1	1	1	1	2	1	1	1	1	1	1	1	1	1	1	1	1	1	2	1	1	1	1	1
188	hCoV-19/Italy/INMI1-isl/2020|EPI_ISL_410545|2020-01-29_S	hCoV-19/Italy/INMI1-isl/2020|EPI_ISL_410545|2020-01-29_S	143369.26	0	0	0	0	0	0	1	1	3	3	4	6	10	12	0	0	0	0	0	0	1	1	2	2	2	5	7	7	0	0	0	0	0	0	1	1	2	2	2	5	7	7
189	sp|O75594|PGRP1_HUMAN	sp|O75594|PGRP1_HUMAN Peptidoglycan recognition protein 1 OS=Homo sapiens GN=PGLYRP1 PE=1 SV=1	22115.84	3	2	3	4	1	4	2	4	3	3	3	2	2	3	2	1	2	2	1	2	2	2	2	2	2	2	2	2	2	1	2	2	1	2	2	2	2	2	2	2	2	2
190	sp|P26641|EF1G_HUMAN	sp|P26641|EF1G_HUMAN Elongation factor 1-gamma OS=Homo sapiens GN=EEF1G PE=1 SV=3	50429.27	6	5	3	4	4	4	1	1	2	2	2	2	1	2	4	5	3	4	3	4	1	1	2	2	2	2	1	2	4	5	3	4	3	4	1	1	2	2	2	2	1	2
191	sp|P04899|GNAI2_HUMAN	sp|P04899|GNAI2_HUMAN Guanine nucleotide-binding protein G(i) subunit alpha-2 OS=Homo sapiens GN=GNAI2 PE=1 SV=3	40995.27	3	3	3	3	3	2	2	3	2	3	3	3	3	3	1	1	1	1	1	1	1	1	1	1	1	1	1	1	1	1	1	1	1	1	1	1	1	1	1	1	1	1
192	sp|P31949|S10AB_HUMAN	sp|P31949|S10AB_HUMAN Protein S100-A11 OS=Homo sapiens GN=S100A11 PE=1 SV=2	11846.87	3	3	3	1	4	2	2	1	5	3	4	3	3	2	1	2	1	1	2	1	1	1	2	2	1	2	1	1	1	2	1	1	2	1	1	1	2	2	1	2	1	1
193	sp|P80303|NUCB2_HUMAN	sp|P80303|NUCB2_HUMAN Nucleobindin-2 OS=Homo sapiens GN=NUCB2 PE=1 SV=2	50278.39	3	3	1	3	3	4	3	3	3	5	1	2	1	4	3	2	1	2	3	4	3	2	3	3	1	2	1	3	3	2	1	2	3	4	3	2	3	3	1	2	1	3
194	sp|Q9Y4I1|MYO5A_HUMAN	sp|Q9Y4I1|MYO5A_HUMAN Unconventional myosin-Va OS=Homo sapiens GN=MYO5A PE=1 SV=2	216979.2	2	7	0	5	0	6	1	4	0	5	1	5	0	3	1	1	0	1	0	1	1	1	0	1	1	1	0	1	1	1	0	1	0	1	1	1	0	1	1	1	0	1
195	sp|P19957|ELAF_HUMAN	sp|P19957|ELAF_HUMAN Elafin OS=Homo sapiens GN=PI3 PE=1 SV=3	12717.56	4	1	6	1	5	1	4	1	6	2	3	1	3	1	3	1	2	1	3	1	2	1	3	2	2	1	2	1	3	1	2	1	3	1	2	1	3	2	2	1	2	1
196	sp|P34932|HSP74_HUMAN	sp|P34932|HSP74_HUMAN Heat shock 70 kDa protein 4 OS=Homo sapiens GN=HSPA4 PE=1 SV=4	95126.56	2	3	2	3	3	4	4	2	3	2	2	2	4	3	2	3	2	3	3	4	4	2	3	2	1	2	3	3	2	3	2	3	3	4	4	2	3	2	1	2	3	3
197	sp|P15531|NDKA_HUMAN	sp|P15531|NDKA_HUMAN Nucleoside diphosphate kinase A OS=Homo sapiens GN=NME1 PE=1 SV=1	17308.74	3	3	2	3	3	3	3	3	3	3	3	2	2	3	1	1	1	1	1	1	1	1	1	1	1	1	1	1	1	1	1	1	1	1	1	1	1	1	1	1	1	1
198	sp|P29692|EF1D_HUMAN	sp|P29692|EF1D_HUMAN Elongation factor 1-delta OS=Homo sapiens GN=EEF1D PE=1 SV=5	31216.83	3	2	2	4	2	4	2	3	3	3	2	3	2	3	2	1	1	2	1	2	2	2	2	2	1	2	2	2	2	1	1	2	1	2	2	2	2	2	1	2	2	2
199	sp|P49862|KLK7_HUMAN	sp|P49862|KLK7_HUMAN Kallikrein-7 OS=Homo sapiens GN=KLK7 PE=1 SV=1	28191.07	2	3	1	4	3	4	3	3	1	3	2	3	3	3	1	2	1	3	2	3	2	2	1	2	1	2	2	2	1	2	1	3	2	3	2	2	1	2	1	2	2	2
200	sp|P20160|CAP7_HUMAN	sp|P20160|CAP7_HUMAN Azurocidin OS=Homo sapiens GN=AZU1 PE=1 SV=3	27324.83	2	0	2	4	2	3	2	4	1	4	2	5	2	5	1	0	1	1	1	1	1	1	1	1	1	1	1	1	1	0	1	1	1	1	1	1	1	1	1	1	1	1
201	sp|P01861|IGHG4_HUMAN	sp|P01861|IGHG4_HUMAN Ig gamma-4 chain C region OS=Homo sapiens GN=IGHG4 PE=1 SV=1	36431.06	2	2	2	2	3	2	4	2	3	2	4	2	5	2	1	1	1	1	1	1	1	1	1	1	1	1	1	1	1	1	1	1	1	1	1	1	1	1	1	1	1	1
202	sp|P33176|KINH_HUMAN	sp|P33176|KINH_HUMAN Kinesin-1 heavy chain OS=Homo sapiens GN=KIF5B PE=1 SV=1	110358.27	5	2	2	2	2	2	2	3	3	3	3	3	2	3	4	2	2	2	2	2	2	3	3	3	3	3	2	3	4	2	2	2	2	2	2	3	3	3	3	3	2	3
203	sp|P29350|PTN6_HUMAN	sp|P29350|PTN6_HUMAN Tyrosine-protein phosphatase non-receptor type 6 OS=Homo sapiens GN=PTPN6 PE=1 SV=1	67918.21	2	3	2	3	3	2	3	3	2	4	3	2	3	2	2	3	2	3	3	2	3	2	2	3	3	2	3	2	2	3	2	3	3	2	3	2	2	3	3	2	3	2
204	sp|P61006|RAB8A_HUMAN	sp|P61006|RAB8A_HUMAN Ras-related protein Rab-8A OS=Homo sapiens GN=RAB8A PE=1 SV=1	23824.25	3	2	2	1	3	1	3	1	3	1	3	1	3	2	2	2	2	1	2	1	3	1	2	1	2	1	2	2	2	2	2	1	2	1	3	1	2	1	2	1	2	2
204	sp|Q9H0U4|RAB1B_HUMAN	sp|Q9H0U4|RAB1B_HUMAN Ras-related protein Rab-1B OS=Homo sapiens GN=RAB1B PE=1 SV=1	22328.29	2	2	3	3	3	2	2	1	2	1	2	1	2	1	1	1	1	1	1	1	1	1	1	1	1	1	1	1	2	1	2	1	2	1	2	1	2	1	2	1	2	1
204	sp|P62820|RAB1A_HUMAN	sp|P62820|RAB1A_HUMAN Ras-related protein Rab-1A OS=Homo sapiens GN=RAB1A PE=1 SV=3	22891.47	0	1	0	1	0	1	0	0	0	0	2	1	1	1	0	1	0	1	0	1	0	0	0	0	1	1	1	1	1	1	1	1	1	1	1	0	1	0	2	1	2	1
204	sp|Q92930|RAB8B_HUMAN	sp|Q92930|RAB8B_HUMAN Ras-related protein Rab-8B OS=Homo sapiens GN=RAB8B PE=1 SV=2	23740.14	0	1	0	1	0	1	0	1	0	1	0	1	0	0	0	1	0	1	0	1	0	1	0	1	0	1	0	0	1	1	1	1	1	1	1	1	1	1	1	1	1	0
205	sp|Q9H2G2|SLK_HUMAN	sp|Q9H2G2|SLK_HUMAN STE20-like serine/threonine-protein kinase OS=Homo sapiens GN=SLK PE=1 SV=1	143234.47	1	2	2	4	1	3	1	6	1	3	1	4	3	5	1	2	2	4	1	3	1	6	1	3	1	4	3	5	1	2	2	4	1	3	1	6	1	3	1	4	3	5
206	sp|P00747|PLMN_HUMAN	sp|P00747|PLMN_HUMAN Plasminogen OS=Homo sapiens GN=PLG PE=1 SV=2	93247.19	3	0	3	1	3	1	3	2	4	3	3	2	6	3	3	0	3	1	3	1	3	1	4	2	3	2	5	2	3	0	3	1	3	1	3	1	4	2	3	2	5	2
207	sp|Q8WWI1|LMO7_HUMAN	sp|Q8WWI1|LMO7_HUMAN LIM domain only protein 7 OS=Homo sapiens GN=LMO7 PE=1 SV=3	194001.95	5	2	3	1	4	1	4	3	3	1	2	2	4	2	5	2	3	1	4	1	4	3	3	1	2	2	4	2	5	2	3	1	4	1	4	3	3	1	2	2	4	2
208	sp|P50990|TCPQ_HUMAN	sp|P50990|TCPQ_HUMAN T-complex protein 1 subunit theta OS=Homo sapiens GN=CCT8 PE=1 SV=4	60152.72	1	2	2	4	0	5	0	3	1	5	3	4	2	4	1	2	2	3	0	4	0	3	1	4	3	3	2	4	1	2	2	3	0	4	0	3	1	4	4	3	2	4
209	sp|P23396|RS3_HUMAN	sp|P23396|RS3_HUMAN 40S ribosomal protein S3 OS=Homo sapiens GN=RPS3 PE=1 SV=2	26842.49	3	3	2	3	1	3	2	3	2	3	3	3	1	4	2	2	2	2	1	2	2	2	2	2	2	2	1	2	2	2	2	2	1	2	2	2	2	2	2	2	1	2
210	sp|P02749|APOH_HUMAN	sp|P02749|APOH_HUMAN Beta-2-glycoprotein 1 OS=Homo sapiens GN=APOH PE=1 SV=3	39584.15	3	2	3	2	3	2	3	2	3	2	4	1	3	2	2	1	2	1	2	1	2	1	2	1	3	1	2	1	2	1	2	1	2	1	2	1	2	1	3	1	2	1
211	sp|Q02543|RL18A_HUMAN	sp|Q02543|RL18A_HUMAN 60S ribosomal protein L18a OS=Homo sapiens GN=RPL18A PE=1 SV=2	21034.01	1	2	2	3	2	3	3	5	2	2	1	3	1	5	1	1	1	1	2	2	2	2	1	1	1	2	1	2	1	1	1	1	2	2	2	2	1	1	1	2	1	2
212	sp|P01040|CYTA_HUMAN	sp|P01040|CYTA_HUMAN Cystatin-A OS=Homo sapiens GN=CSTA PE=1 SV=1	10999.66	4	3	2	3	1	2	5	2	1	3	2	3	2	2	2	2	1	1	1	1	2	1	1	2	2	1	1	1	2	2	1	1	1	1	2	1	1	2	2	1	1	1
213	sp|Q99497|PARK7_HUMAN	sp|Q99497|PARK7_HUMAN Protein deglycase DJ-1 OS=Homo sapiens GN=PARK7 PE=1 SV=2	20049.55	2	2	3	2	3	2	3	2	3	1	3	2	5	2	2	2	2	2	2	2	2	2	3	1	2	2	3	2	2	2	2	2	2	2	2	2	3	1	2	2	3	2
214	sp|P61513|RL37A_HUMAN	sp|P61513|RL37A_HUMAN 60S ribosomal protein L37a OS=Homo sapiens GN=RPL37A PE=1 SV=2	10496.56	3	3	2	1	3	1	1	2	2	4	2	4	3	4	3	3	2	1	3	1	1	1	2	3	2	3	3	3	3	3	2	1	3	1	1	1	2	3	2	3	3	3
215	sp|P59998|ARPC4_HUMAN	sp|P59998|ARPC4_HUMAN Actin-related protein 2/3 complex subunit 4 OS=Homo sapiens GN=ARPC4 PE=1 SV=3	19768.35	2	2	2	3	2	3	2	3	2	3	2	3	3	3	1	1	1	1	1	1	1	1	1	1	1	1	1	1	1	1	1	1	1	1	1	1	1	1	1	1	1	1
216	sp|P14866|HNRPL_HUMAN	sp|P14866|HNRPL_HUMAN Heterogeneous nuclear ribonucleoprotein L OS=Homo sapiens GN=HNRNPL PE=1 SV=2	64719.6	3	4	2	3	2	3	1	2	0	3	3	4	2	3	3	3	2	3	2	3	1	2	0	3	3	3	2	3	3	3	2	3	2	3	1	2	0	3	3	3	2	3
217	sp|C9JRZ8|AK1BF_HUMAN	sp|C9JRZ8|AK1BF_HUMAN Aldo-keto reductase family 1 member B15 OS=Homo sapiens GN=AKR1B15 PE=1 SV=2	36684.87	2	2	2	4	1	3	1	3	1	4	3	4	1	3	2	2	2	3	1	2	1	2	1	3	2	3	1	2	2	2	2	3	1	2	1	2	1	3	2	3	1	2
218	sp|P31930|QCR1_HUMAN	sp|P31930|QCR1_HUMAN Cytochrome b-c1 complex subunit 1, mitochondrial OS=Homo sapiens GN=UQCRC1 PE=1 SV=3	53296.69	1	2	3	3	2	2	2	3	3	3	2	2	2	4	1	1	2	2	1	1	1	2	2	2	1	1	1	3	1	1	2	2	1	1	1	2	2	2	1	1	1	3
219	sp|A8K2U0|A2ML1_HUMAN	sp|A8K2U0|A2ML1_HUMAN Alpha-2-macroglobulin-like protein 1 OS=Homo sapiens GN=A2ML1 PE=1 SV=3	162429.6	3	2	3	2	3	2	3	2	3	2	3	2	3	1	2	1	2	1	2	1	2	1	2	1	2	1	2	1	2	1	2	1	2	1	2	1	2	1	2	1	2	1
220	sp|P43652|AFAM_HUMAN	sp|P43652|AFAM_HUMAN Afamin OS=Homo sapiens GN=AFM PE=1 SV=1	70962.74	5	0	5	1	4	0	5	0	3	1	7	0	3	0	4	0	3	1	3	0	4	0	2	1	5	0	3	0	4	0	3	1	3	0	4	0	2	1	5	0	3	0
221	sp|P47756|CAPZB_HUMAN	sp|P47756|CAPZB_HUMAN F-actin-capping protein subunit beta OS=Homo sapiens GN=CAPZB PE=1 SV=4	31615.88	1	2	2	2	3	2	3	2	3	2	3	2	3	3	1	1	2	1	2	1	2	1	2	1	2	1	2	2	1	1	2	1	2	1	2	1	2	1	2	1	2	2
222	sp|Q8TAX7|MUC7_HUMAN	sp|Q8TAX7|MUC7_HUMAN Mucin-7 OS=Homo sapiens GN=MUC7 PE=1 SV=2	39419.77	2	2	1	4	2	4	2	3	1	3	2	3	2	2	1	1	1	2	1	2	1	2	1	2	1	2	2	2	1	1	1	2	1	2	1	2	1	2	1	2	2	2
223	sp|O15231|ZN185_HUMAN	sp|O15231|ZN185_HUMAN Zinc finger protein 185 OS=Homo sapiens GN=ZNF185 PE=1 SV=3	74392.55	4	2	2	3	2	1	1	4	5	2	3	1	1	2	3	2	2	3	2	1	1	4	4	2	3	1	1	2	3	2	2	3	2	1	1	4	4	2	3	1	1	2
224	sp|P21980|TGM2_HUMAN	sp|P21980|TGM2_HUMAN Protein-glutamine gamma-glutamyltransferase 2 OS=Homo sapiens GN=TGM2 PE=1 SV=2	78420.1	4	0	5	0	4	0	5	0	5	0	6	0	4	0	3	0	3	0	3	0	3	0	3	0	3	0	3	0	3	0	3	0	3	0	3	0	3	0	3	0	3	0
225	sp|P35573|GDE_HUMAN	sp|P35573|GDE_HUMAN Glycogen debranching enzyme OS=Homo sapiens GN=AGL PE=1 SV=3	176818.68	2	4	2	2	2	2	3	4	2	2	1	4	1	2	2	4	2	2	2	2	3	3	2	2	1	3	1	1	2	4	2	2	2	2	3	3	2	2	1	3	1	1
226	sp|P31948|STIP1_HUMAN	sp|P31948|STIP1_HUMAN Stress-induced-phosphoprotein 1 OS=Homo sapiens GN=STIP1 PE=1 SV=1	63226.64	4	1	2	3	3	2	5	1	2	2	2	3	2	1	4	1	2	2	2	2	3	1	2	1	2	2	1	1	4	1	2	2	2	2	3	1	2	1	2	2	1	1
227	sp|P46779|RL28_HUMAN	sp|P46779|RL28_HUMAN 60S ribosomal protein L28 OS=Homo sapiens GN=RPL28 PE=1 SV=3	15794.69	1	1	1	1	2	4	1	4	3	4	2	4	1	4	1	1	1	1	2	3	1	3	3	3	2	3	1	3	1	1	1	1	2	3	1	3	3	3	2	3	1	3
228	sp|P49411|EFTU_HUMAN	sp|P49411|EFTU_HUMAN Elongation factor Tu, mitochondrial OS=Homo sapiens GN=TUFM PE=1 SV=2	49852.31	1	4	1	4	1	4	1	3	0	3	2	3	2	3	1	4	1	3	1	3	1	2	0	2	1	3	1	2	1	4	1	3	1	3	1	2	0	2	1	3	1	2
229	sp|Q92896|GSLG1_HUMAN	sp|Q92896|GSLG1_HUMAN Golgi apparatus protein 1 OS=Homo sapiens GN=GLG1 PE=1 SV=2	138341.06	2	1	4	2	2	2	3	2	2	2	5	1	2	2	2	1	3	2	2	2	3	2	2	2	4	1	2	2	2	1	3	2	2	2	3	2	2	2	4	1	2	2
230	sp|P30043|BLVRB_HUMAN	sp|P30043|BLVRB_HUMAN Flavin reductase (NADPH) OS=Homo sapiens GN=BLVRB PE=1 SV=3	22219.47	2	0	3	1	3	3	2	3	3	2	3	3	3	1	1	0	1	1	1	1	1	1	1	1	1	1	1	1	1	0	1	1	1	1	1	1	1	1	1	1	1	1
231	sp|P15144|AMPN_HUMAN	sp|P15144|AMPN_HUMAN Aminopeptidase N OS=Homo sapiens GN=ANPEP PE=1 SV=4	109870.03	1	4	2	2	2	4	1	2	1	3	1	4	0	5	1	3	2	2	2	4	1	2	1	3	1	4	0	4	1	3	2	2	2	4	1	2	1	3	1	4	0	4
232	sp|P61313|RL15_HUMAN	sp|P61313|RL15_HUMAN 60S ribosomal protein L15 OS=Homo sapiens GN=RPL15 PE=1 SV=2	24245.13	2	2	2	3	1	3	2	3	0	5	1	3	2	3	2	2	2	3	1	3	2	3	0	4	1	3	2	3	2	2	2	3	1	3	2	3	0	4	1	3	2	3
233	sp|O00602|FCN1_HUMAN	sp|O00602|FCN1_HUMAN Ficolin-1 OS=Homo sapiens GN=FCN1 PE=1 SV=2	35512.27	1	3	1	4	1	4	0	4	0	4	1	4	1	4	1	2	1	3	1	3	0	3	0	3	1	3	1	3	1	2	1	3	1	3	0	3	0	3	1	3	1	3
234	sp|P01717|LV325_HUMAN	sp|P01717|LV325_HUMAN Immunoglobulin lambda variable 3-25 OS=Homo sapiens GN=IGLV3-25 PE=1 SV=2	12174.91	3	2	3	2	3	2	2	1	3	2	3	2	2	2	1	1	1	1	1	1	1	1	1	1	1	1	1	1	1	1	1	1	1	1	1	1	1	1	1	1	1	1
235	sp|P13667|PDIA4_HUMAN	sp|P13667|PDIA4_HUMAN Protein disulfide-isomerase A4 OS=Homo sapiens GN=PDIA4 PE=1 SV=2	73229.1	3	1	2	2	3	1	3	1	4	1	3	2	4	1	2	1	2	2	3	1	3	1	2	1	3	2	2	1	2	1	2	2	3	1	3	1	2	1	3	2	2	1
236	sp|P05090|APOD_HUMAN	sp|P05090|APOD_HUMAN Apolipoprotein D OS=Homo sapiens GN=APOD PE=1 SV=1	21546.87	4	1	3	1	4	3	3	1	3	1	3	1	2	1	2	1	2	1	3	3	2	1	2	1	2	1	1	1	2	1	2	1	3	3	2	1	2	1	2	1	1	1
237	sp|P16050|LOX15_HUMAN	sp|P16050|LOX15_HUMAN Arachidonate 15-lipoxygenase OS=Homo sapiens GN=ALOX15 PE=1 SV=3	75497.79	3	1	3	1	6	0	4	1	3	1	3	1	3	1	2	1	2	1	3	0	2	1	2	1	2	1	2	1	2	1	2	1	3	0	2	1	2	1	2	1	2	1
238	sp|P78371|TCPB_HUMAN	sp|P78371|TCPB_HUMAN T-complex protein 1 subunit beta OS=Homo sapiens GN=CCT2 PE=1 SV=4	57794.26	2	3	1	2	2	3	2	1	1	2	2	2	4	4	2	3	1	2	2	3	2	1	1	2	2	2	4	3	2	3	1	2	2	3	2	1	1	2	2	2	4	3
239	sp|O14818|PSA7_HUMAN	sp|O14818|PSA7_HUMAN Proteasome subunit alpha type-7 OS=Homo sapiens GN=PSMA7 PE=1 SV=1	28040.68	3	3	2	3	3	2	3	2	2	2	2	2	2	0	1	1	1	2	2	1	1	1	1	1	1	1	1	0	1	1	1	2	2	1	1	1	1	1	1	1	1	0
240	sp|Q14134|TRI29_HUMAN	sp|Q14134|TRI29_HUMAN Tripartite motif-containing protein 29 OS=Homo sapiens GN=TRIM29 PE=1 SV=2	66477.56	3	2	1	2	1	3	2	3	2	3	1	3	2	3	2	2	1	2	1	2	2	2	2	2	1	2	1	2	2	2	1	2	1	2	2	2	2	2	1	2	1	2
241	sp|Q96C19|EFHD2_HUMAN	sp|Q96C19|EFHD2_HUMAN EF-hand domain-containing protein D2 OS=Homo sapiens GN=EFHD2 PE=1 SV=1	26794.5	3	2	2	2	2	3	2	2	3	2	0	4	0	3	2	1	1	1	1	2	1	1	2	1	0	2	0	2	2	1	1	1	1	2	1	1	2	1	0	2	0	2
242	sp|P61088|UBE2N_HUMAN	sp|P61088|UBE2N_HUMAN Ubiquitin-conjugating enzyme E2 N OS=Homo sapiens GN=UBE2N PE=1 SV=1	17184.0	2	2	2	2	2	2	2	2	2	2	3	2	3	2	1	1	1	1	1	1	1	1	1	1	2	1	2	1	1	1	1	1	1	1	1	1	1	1	2	1	2	1
243	sp|P07814|SYEP_HUMAN	sp|P07814|SYEP_HUMAN Bifunctional glutamate/proline--tRNA ligase OS=Homo sapiens GN=EPRS PE=1 SV=5	172079.7	3	2	2	2	3	2	2	2	1	1	3	2	3	2	2	2	2	2	2	2	2	2	1	1	3	2	2	2	2	2	2	2	2	2	2	2	1	1	3	2	2	2
244	sp|P36871|PGM1_HUMAN	sp|P36871|PGM1_HUMAN Phosphoglucomutase-1 OS=Homo sapiens GN=PGM1 PE=1 SV=3	61695.64	2	2	2	3	2	2	2	0	2	2	3	1	5	2	2	2	1	3	2	2	1	0	1	2	2	1	3	1	2	2	1	3	2	2	1	0	1	2	2	1	3	1
245	sp|Q01813|PFKAP_HUMAN	sp|Q01813|PFKAP_HUMAN ATP-dependent 6-phosphofructokinase, platelet type OS=Homo sapiens GN=PFKP PE=1 SV=2	86453.87	3	2	2	2	2	2	2	2	2	2	2	2	2	2	2	2	2	2	2	2	2	2	2	2	2	2	2	2	2	2	2	2	2	2	2	2	2	2	2	2	2	2
246	sp|P01036|CYTS_HUMAN	sp|P01036|CYTS_HUMAN Cystatin-S OS=Homo sapiens GN=CST4 PE=1 SV=3	16489.07	3	6	2	6	2	6	3	6	3	5	2	6	2	6	2	3	2	3	2	2	2	3	2	3	2	3	2	2	2	3	2	3	2	2	2	3	2	3	2	3	2	2
247	sp|Q16658|FSCN1_HUMAN	sp|Q16658|FSCN1_HUMAN Fascin OS=Homo sapiens GN=FSCN1 PE=1 SV=3	55123.29	2	2	2	2	1	3	1	2	3	3	2	2	2	2	2	2	2	2	1	2	1	2	2	3	2	2	2	2	2	2	2	2	1	2	1	2	2	3	2	2	2	2
248	sp|P40939|ECHA_HUMAN	sp|P40939|ECHA_HUMAN Trifunctional enzyme subunit alpha, mitochondrial OS=Homo sapiens GN=HADHA PE=1 SV=2	83688.15	4	2	3	1	1	1	3	1	4	1	3	2	2	1	3	2	3	1	1	1	3	1	3	1	3	2	2	1	3	2	3	1	1	1	3	1	3	1	3	2	2	1
249	sp|P62195|PRS8_HUMAN	sp|P62195|PRS8_HUMAN 26S protease regulatory subunit 8 OS=Homo sapiens GN=PSMC5 PE=1 SV=1	45768.12	2	1	2	2	1	2	2	3	2	1	3	3	3	2	2	1	2	2	1	2	2	3	2	1	3	3	3	2	2	1	2	2	1	2	2	3	2	1	3	3	3	2
250	sp|Q96QK1|VPS35_HUMAN	sp|Q96QK1|VPS35_HUMAN Vacuolar protein sorting-associated protein 35 OS=Homo sapiens GN=VPS35 PE=1 SV=2	92447.23	2	2	2	2	1	2	2	2	2	2	2	2	4	2	2	2	2	2	1	2	2	2	2	2	2	2	3	2	2	2	2	2	1	2	2	2	2	2	2	2	3	2
251	sp|P04179|SODM_HUMAN	SODM_HUMAN Superoxide dismutase	24877.62	2	1	2	2	2	1	2	3	1	3	2	4	3	1	2	1	1	1	2	1	1	1	1	1	2	1	2	1	2	1	1	1	2	1	1	1	1	1	2	1	2	1
252	sp|P62826|RAN_HUMAN	sp|P62826|RAN_HUMAN GTP-binding nuclear protein Ran OS=Homo sapiens GN=RAN PE=1 SV=3	24578.68	1	1	3	2	3	2	2	2	3	2	3	2	2	1	1	1	2	1	2	1	1	1	2	1	2	1	2	1	1	1	2	1	2	1	1	1	2	1	2	1	2	1
253	sp|P13489|RINI_HUMAN	sp|P13489|RINI_HUMAN Ribonuclease inhibitor OS=Homo sapiens GN=RNH1 PE=1 SV=2	51765.77	1	2	3	1	1	1	2	2	4	2	2	3	3	2	1	2	3	1	1	1	2	1	3	1	2	2	2	1	1	2	3	1	1	1	2	1	3	1	2	2	2	1
254	sp|P52597|HNRPF_HUMAN	sp|P52597|HNRPF_HUMAN Heterogeneous nuclear ribonucleoprotein F OS=Homo sapiens GN=HNRNPF PE=1 SV=3	45984.98	2	3	2	2	1	3	2	3	2	3	2	2	0	2	1	1	1	1	1	1	1	1	1	1	1	1	0	1	1	1	1	1	1	1	1	1	1	1	1	1	0	1
255	sp|Q8WVV4|POF1B_HUMAN	sp|Q8WVV4|POF1B_HUMAN Protein POF1B OS=Homo sapiens GN=POF1B PE=1 SV=3	68877.72	3	1	2	1	1	0	3	1	5	1	3	2	3	3	3	1	2	1	1	0	3	1	4	1	3	2	3	3	3	1	2	1	1	0	3	1	4	1	3	2	3	3
256	sp|P28838|AMPL_HUMAN	sp|P28838|AMPL_HUMAN Cytosol aminopeptidase OS=Homo sapiens GN=LAP3 PE=1 SV=3	56529.96	2	2	2	0	2	1	3	1	3	2	4	1	4	2	2	2	2	0	2	1	2	1	2	1	2	1	3	1	2	2	2	0	2	1	2	1	2	1	2	1	3	1
257	sp|P17987|TCPA_HUMAN	sp|P17987|TCPA_HUMAN T-complex protein 1 subunit alpha OS=Homo sapiens GN=TCP1 PE=1 SV=1	60818.77	1	4	1	3	1	3	1	1	1	1	3	3	3	3	1	2	1	2	1	2	1	1	1	1	2	2	2	2	1	2	1	2	1	2	1	1	1	1	2	2	2	2
258	sp|Q14624|ITIH4_HUMAN	sp|Q14624|ITIH4_HUMAN Inter-alpha-trypsin inhibitor heavy chain H4 OS=Homo sapiens GN=ITIH4 PE=1 SV=4	103521.07	2	2	2	2	2	2	3	2	2	2	3	1	2	2	1	1	1	1	1	1	2	1	1	1	2	1	1	1	1	1	1	1	1	1	2	1	1	1	2	1	1	1
259	sp|P51991|ROA3_HUMAN	sp|P51991|ROA3_HUMAN Heterogeneous nuclear ribonucleoprotein A3 OS=Homo sapiens GN=HNRNPA3 PE=1 SV=2	39798.67	1	2	2	3	2	3	3	1	2	2	2	3	1	2	1	2	2	2	2	2	2	1	1	2	2	3	1	2	1	2	2	2	2	2	2	1	1	2	2	3	1	2
260	sp|P01033|TIMP1_HUMAN	sp|P01033|TIMP1_HUMAN Metalloproteinase inhibitor 1 OS=Homo sapiens GN=TIMP1 PE=1 SV=1	23839.81	3	2	2	2	2	2	1	2	2	2	2	2	2	2	1	1	1	1	1	1	1	1	1	1	1	1	1	1	1	1	1	1	1	1	1	1	1	1	1	1	1	1
261	sp|P62753|RS6_HUMAN	sp|P62753|RS6_HUMAN 40S ribosomal protein S6 OS=Homo sapiens GN=RPS6 PE=1 SV=1	28834.05	2	2	2	2	2	2	2	2	2	2	2	2	2	2	2	2	2	2	2	2	2	2	2	2	2	2	2	2	2	2	2	2	2	2	2	2	2	2	2	2	2	2
262	sp|Q9UM07|PADI4_HUMAN	sp|Q9UM07|PADI4_HUMAN Protein-arginine deiminase type-4 OS=Homo sapiens GN=PADI4 PE=1 SV=2	75114.78	1	2	1	2	1	4	1	6	2	3	1	2	0	2	1	1	1	1	1	3	1	5	1	2	1	1	0	2	1	1	1	1	1	3	1	5	1	2	1	1	0	2
263	sp|P62701|RS4X_HUMAN	sp|P62701|RS4X_HUMAN 40S ribosomal protein S4, X isoform OS=Homo sapiens GN=RPS4X PE=1 SV=2	29807.14	3	3	3	3	1	3	3	3	1	5	2	6	4	5	3	3	3	3	1	3	2	2	1	3	2	4	3	3	3	3	3	3	1	3	2	2	1	3	2	4	3	3
264	sp|Q07065|CKAP4_HUMAN	sp|Q07065|CKAP4_HUMAN Cytoskeleton-associated protein 4 OS=Homo sapiens GN=CKAP4 PE=1 SV=2	66096.77	2	3	2	3	1	3	3	1	2	2	2	1	1	2	2	2	2	2	1	2	2	1	2	2	2	1	1	2	2	2	2	2	1	2	2	1	2	2	2	1	1	2
265	sp|P04196|HRG_HUMAN	sp|P04196|HRG_HUMAN Histidine-rich glycoprotein OS=Homo sapiens GN=HRG PE=1 SV=1	60510.23	3	1	3	2	2	1	2	1	2	1	3	1	5	1	2	1	2	2	2	1	2	1	1	1	2	1	3	1	2	1	2	2	2	1	2	1	1	1	2	1	3	1
266	sp|Q9UJU6|DBNL_HUMAN	sp|Q9UJU6|DBNL_HUMAN Drebrin-like protein OS=Homo sapiens GN=DBNL PE=1 SV=1	48462.67	2	2	1	1	3	1	3	3	2	2	2	1	2	3	2	2	1	1	3	1	3	3	2	2	2	1	2	3	2	2	1	1	3	1	3	3	2	2	2	1	2	3
267	sp|P00326|ADH1G_HUMAN	sp|P00326|ADH1G_HUMAN Alcohol dehydrogenase 1C OS=Homo sapiens GN=ADH1C PE=1 SV=2	40697.0	5	0	4	1	5	1	6	2	4	1	5	2	6	2	3	0	2	1	2	1	4	2	2	1	3	2	3	2	3	0	2	1	2	1	4	2	2	1	3	2	3	2
268	sp|P20700|LMNB1_HUMAN	sp|P20700|LMNB1_HUMAN Lamin-B1 OS=Homo sapiens GN=LMNB1 PE=1 SV=2	66652.73	2	3	2	1	2	1	1	2	3	2	2	2	1	3	2	3	2	1	2	1	1	2	2	2	2	2	1	3	2	3	2	1	2	1	1	2	2	2	2	2	1	3
269	sp|Q9Y262|EIF3L_HUMAN	sp|Q9Y262|EIF3L_HUMAN Eukaryotic translation initiation factor 3 subunit L OS=Homo sapiens GN=EIF3L PE=1 SV=1	66912.49	2	2	2	2	2	2	2	2	2	1	2	2	1	3	1	1	1	1	1	1	1	1	1	1	1	1	1	2	1	1	1	1	1	1	1	1	1	1	1	1	1	2
270	sp|P62263|RS14_HUMAN	sp|P62263|RS14_HUMAN 40S ribosomal protein S14 OS=Homo sapiens GN=RPS14 PE=1 SV=3	16433.6	1	2	2	2	2	2	2	2	2	2	2	2	2	2	1	1	1	1	1	1	1	1	1	1	1	1	1	1	1	1	1	1	1	1	1	1	1	1	1	1	1	1
271	sp|A0A0C4DH25|KVD20_HUMAN	sp|A0A0C4DH25|KVD20_HUMAN Immunoglobulin kappa variable 3-20 OS=Homo sapiens GN=IGKV3D-20 PE=3 SV=1	12621.28	2	2	2	2	3	2	2	2	2	2	2	2	2	2	1	1	1	1	1	1	1	1	1	1	1	1	1	1	1	1	1	1	1	1	1	1	1	1	1	1	1	1
272	sp|O60664|PLIN3_HUMAN	sp|O60664|PLIN3_HUMAN Perilipin-3 OS=Homo sapiens GN=PLIN3 PE=1 SV=3	47217.01	2	3	3	1	3	2	1	2	2	3	2	0	2	1	2	3	3	1	3	2	1	2	2	3	2	0	2	1	2	3	3	1	3	2	1	2	2	3	2	0	2	1
273	sp|P08697|A2AP_HUMAN	sp|P08697|A2AP_HUMAN Alpha-2-antiplasmin OS=Homo sapiens GN=SERPINF2 PE=1 SV=3	54873.19	4	0	4	1	2	1	4	1	3	1	2	1	2	1	2	0	2	1	2	1	2	1	2	1	2	1	2	1	2	0	2	1	2	1	2	1	2	1	2	1	2	1
274	sp|Q6P4A8|PLBL1_HUMAN	sp|Q6P4A8|PLBL1_HUMAN Phospholipase B-like 1 OS=Homo sapiens GN=PLBD1 PE=1 SV=2	63499.29	2	2	2	2	2	2	2	2	2	2	1	2	1	2	1	1	1	1	1	1	1	1	1	1	1	1	1	1	1	1	1	1	1	1	1	1	1	1	1	1	1	1
275	sp|Q8NC51|PAIRB_HUMAN	sp|Q8NC51|PAIRB_HUMAN Plasminogen activator inhibitor 1 RNA-binding protein OS=Homo sapiens GN=SERBP1 PE=1 SV=2	44995.48	1	3	2	1	2	2	1	2	3	2	1	3	2	1	1	3	2	1	2	2	1	2	3	2	1	3	2	1	1	3	2	1	2	2	1	2	3	2	1	3	2	1
276	sp|P13987|CD59_HUMAN	sp|P13987|CD59_HUMAN CD59 glycoprotein OS=Homo sapiens GN=CD59 PE=1 SV=1	14795.03	2	2	2	2	1	2	2	2	2	2	2	1	2	2	1	1	1	1	1	1	1	1	1	1	1	1	1	1	1	1	1	1	1	1	1	1	1	1	1	1	1	1
277	sp|Q15363|TMED2_HUMAN	sp|Q15363|TMED2_HUMAN Transmembrane emp24 domain-containing protein 2 OS=Homo sapiens GN=TMED2 PE=1 SV=1	22860.42	1	1	1	2	1	3	2	4	2	3	1	1	2	2	1	1	1	1	1	1	2	2	2	1	1	1	2	1	1	1	1	1	1	1	2	2	2	1	1	1	2	1
278	sp|P26640|SYVC_HUMAN	sp|P26640|SYVC_HUMAN Valine--tRNA ligase OS=Homo sapiens GN=VARS PE=1 SV=4	141641.85	2	1	2	1	3	2	2	1	2	1	3	2	3	1	1	1	2	1	2	1	2	1	2	1	2	1	2	1	1	1	2	1	2	1	2	1	2	1	2	1	2	1
279	sp|P14314|GLU2B_HUMAN	sp|P14314|GLU2B_HUMAN Glucosidase 2 subunit beta OS=Homo sapiens GN=PRKCSH PE=1 SV=2	60357.19	2	2	2	1	2	1	2	2	2	1	3	2	2	2	1	1	1	1	1	1	1	1	1	1	1	1	1	1	1	1	1	1	1	1	1	1	1	1	1	1	1	1
280	sp|P80748|LV321_HUMAN	sp|P80748|LV321_HUMAN Immunoglobulin lambda variable 3-21 OS=Homo sapiens GN=IGLV3-21 PE=1 SV=2	12609.05	3	1	1	1	3	2	2	2	1	2	2	2	2	2	1	1	1	1	1	1	1	1	1	1	1	1	1	1	1	1	1	1	1	1	1	1	1	1	1	1	1	1
281	sp|P19878|NCF2_HUMAN	sp|P19878|NCF2_HUMAN Neutrophil cytosol factor 2 OS=Homo sapiens GN=NCF2 PE=1 SV=2	60236.69	1	2	3	2	2	2	2	2	2	1	2	1	3	1	1	2	2	1	1	2	1	2	1	1	1	1	2	1	1	2	2	1	1	2	1	2	1	1	1	1	2	1
282	sp|Q04446|GLGB_HUMAN	sp|Q04446|GLGB_HUMAN 1,4-alpha-glucan-branching enzyme OS=Homo sapiens GN=GBE1 PE=1 SV=3	80878.81	2	2	2	1	3	2	2	1	2	1	2	2	2	2	2	2	2	1	3	2	2	1	2	1	2	2	2	2	2	2	2	1	3	2	2	1	2	1	2	2	2	2
283	sp|Q14203|DCTN1_HUMAN	sp|Q14203|DCTN1_HUMAN Dynactin subunit 1 OS=Homo sapiens GN=DCTN1 PE=1 SV=3	142348.35	2	1	4	0	4	2	2	1	2	1	2	1	3	1	2	1	3	0	3	1	2	1	2	1	2	1	3	1	2	1	3	0	3	1	2	1	2	1	2	1	3	1
284	sp|P25311|ZA2G_HUMAN	sp|P25311|ZA2G_HUMAN Zinc-alpha-2-glycoprotein OS=Homo sapiens GN=AZGP1 PE=1 SV=2	34465.19	1	1	2	2	3	1	3	2	2	2	2	2	2	0	1	1	1	2	2	1	2	2	2	2	1	2	1	0	1	1	1	2	2	1	2	2	2	2	1	2	1	0
285	sp|P32119|PRDX2_HUMAN	sp|P32119|PRDX2_HUMAN Peroxiredoxin-2 OS=Homo sapiens GN=PRDX2 PE=1 SV=5	22049.3	2	0	2	1	2	2	2	1	2	2	2	2	3	2	1	0	1	1	1	1	1	1	1	1	1	1	1	1	1	0	1	1	1	1	1	1	1	1	1	1	1	1
286	sp|P62266|RS23_HUMAN	sp|P62266|RS23_HUMAN 40S ribosomal protein S23 OS=Homo sapiens GN=RPS23 PE=1 SV=3	15968.78	2	1	2	2	2	1	2	2	2	2	2	1	2	2	2	1	2	2	2	1	2	2	2	2	2	1	2	2	2	1	2	2	2	1	2	2	2	2	2	1	2	2
287	sp|Q8NBS9|TXND5_HUMAN	sp|Q8NBS9|TXND5_HUMAN Thioredoxin domain-containing protein 5 OS=Homo sapiens GN=TXNDC5 PE=1 SV=2	48282.92	1	2	3	2	1	2	1	2	1	2	3	2	2	1	1	2	2	2	1	1	1	2	1	2	2	2	2	1	1	2	2	2	1	1	1	2	1	2	2	2	2	1
288	sp|Q15365|PCBP1_HUMAN	sp|Q15365|PCBP1_HUMAN Poly(rC)-binding protein 1 OS=Homo sapiens GN=PCBP1 PE=1 SV=2	37987.14	2	1	2	2	2	1	2	1	2	2	2	2	3	1	2	1	2	1	2	1	2	1	2	1	2	2	2	1	2	1	2	1	2	1	2	1	2	1	2	2	2	1
289	sp|Q99536|VAT1_HUMAN	sp|Q99536|VAT1_HUMAN Synaptic vesicle membrane protein VAT-1 homolog OS=Homo sapiens GN=VAT1 PE=1 SV=2	42121.5	0	2	1	2	2	2	1	2	1	3	2	3	1	3	0	1	1	1	1	1	1	1	1	1	1	1	1	1	0	1	1	1	1	1	1	1	1	1	1	1	1	1
290	sp|P61026|RAB10_HUMAN	sp|P61026|RAB10_HUMAN Ras-related protein Rab-10 OS=Homo sapiens GN=RAB10 PE=1 SV=1	22754.67	2	2	2	2	2	1	2	2	2	1	3	1	2	1	2	2	2	2	2	1	2	2	2	1	3	1	2	1	2	2	2	2	2	1	2	2	2	1	3	1	2	1
291	sp|P46782|RS5_HUMAN	sp|P46782|RS5_HUMAN 40S ribosomal protein S5 OS=Homo sapiens GN=RPS5 PE=1 SV=4	23033.12	2	3	2	2	2	1	1	2	2	1	1	3	1	2	2	3	2	2	2	1	1	2	2	1	1	3	1	2	2	3	2	2	2	1	1	2	2	1	1	3	1	2
292	sp|P02760|AMBP_HUMAN	sp|P02760|AMBP_HUMAN Protein AMBP OS=Homo sapiens GN=AMBP PE=1 SV=1	39886.32	4	1	4	1	3	1	3	0	1	0	3	1	3	0	3	1	3	1	3	1	3	0	1	0	3	1	3	0	3	1	3	1	3	1	3	0	1	0	3	1	3	0
293	sp|P55795|HNRH2_HUMAN	sp|P55795|HNRH2_HUMAN Heterogeneous nuclear ribonucleoprotein H2 OS=Homo sapiens GN=HNRNPH2 PE=1 SV=1	49517.39	2	3	4	4	3	3	2	3	2	4	2	2	3	4	1	2	2	1	1	1	1	2	1	2	1	1	2	2	1	2	2	1	1	1	1	2	1	2	1	1	2	2
294	sp|P15104|GLNA_HUMAN	sp|P15104|GLNA_HUMAN Glutamine synthetase OS=Homo sapiens GN=GLUL PE=1 SV=4	42664.54	1	1	3	1	2	1	2	2	1	2	2	3	2	2	1	1	2	1	1	1	2	2	1	1	1	2	2	1	1	1	2	1	1	1	2	2	1	1	1	2	2	1
295	sp|P62750|RL23A_HUMAN	sp|P62750|RL23A_HUMAN 60S ribosomal protein L23a OS=Homo sapiens GN=RPL23A PE=1 SV=1	17684.13	2	2	2	2	0	3	2	1	1	2	2	2	0	3	1	2	1	2	0	2	1	1	1	1	1	2	0	2	1	2	1	2	0	2	1	1	1	1	1	2	0	2
296	sp|O00764|PDXK_HUMAN	sp|O00764|PDXK_HUMAN Pyridoxal kinase OS=Homo sapiens GN=PDXK PE=1 SV=1	35308.0	1	2	3	1	2	2	2	2	2	1	3	0	2	1	1	2	2	1	1	2	2	2	1	1	2	0	2	1	1	2	2	1	1	2	2	2	1	1	2	0	2	1
297	sp|P52272|HNRPM_HUMAN	sp|P52272|HNRPM_HUMAN Heterogeneous nuclear ribonucleoprotein M OS=Homo sapiens GN=HNRNPM PE=1 SV=3	77749.42	2	0	3	1	2	0	4	1	3	1	0	2	4	1	2	0	3	1	2	0	4	1	3	1	0	2	4	1	2	0	3	1	2	0	4	1	3	1	0	2	4	1
298	sp|P09429|HMGB1_HUMAN	sp|P09429|HMGB1_HUMAN High mobility group protein B1 OS=Homo sapiens GN=HMGB1 PE=1 SV=3	25049.23	2	1	1	2	0	4	3	2	0	2	1	3	3	3	2	1	1	2	0	3	3	2	0	2	1	3	3	3	2	1	1	2	0	3	3	2	0	2	1	3	3	3
299	sp|P06312|KV401_HUMAN	sp|P06312|KV401_HUMAN Immunoglobulin kappa variable 4-1 OS=Homo sapiens GN=IGKV4-1 PE=1 SV=1	13485.64	2	2	2	2	1	1	1	2	1	2	2	2	2	2	1	1	1	1	1	1	1	1	1	1	1	1	1	1	1	1	1	1	1	1	1	1	1	1	1	1	1	1
300	sp|P07998|RNAS1_HUMAN	sp|P07998|RNAS1_HUMAN Ribonuclease pancreatic OS=Homo sapiens GN=RNASE1 PE=1 SV=4	18088.85	2	0	3	1	2	1	2	1	4	1	4	1	2	0	1	0	1	1	1	1	1	1	2	1	2	1	1	0	1	0	1	1	1	1	1	1	2	1	2	1	1	0
301	sp|P12956|XRCC6_HUMAN	sp|P12956|XRCC6_HUMAN X-ray repair cross-complementing protein 6 OS=Homo sapiens GN=XRCC6 PE=1 SV=2	70084.16	1	2	1	2	2	3	2	2	1	2	2	2	2	0	1	2	1	2	2	3	2	2	1	2	2	2	2	0	1	2	1	2	2	3	2	2	1	2	2	2	2	0
302	sp|P31997|CEAM8_HUMAN	sp|P31997|CEAM8_HUMAN Carcinoembryonic antigen-related cell adhesion molecule 8 OS=Homo sapiens GN=CEACAM8 PE=1 SV=2	38415.2	2	2	2	2	1	2	1	2	1	2	2	2	1	2	1	1	1	1	1	1	1	1	1	1	1	1	1	1	1	1	1	1	1	1	1	1	1	1	1	1	1	1
303	sp|Q01082|SPTB2_HUMAN	sp|Q01082|SPTB2_HUMAN Spectrin beta chain, non-erythrocytic 1 OS=Homo sapiens GN=SPTBN1 PE=1 SV=2	275236.98	1	1	3	1	2	0	5	0	0	1	3	2	3	1	1	1	2	1	2	0	5	0	0	1	3	2	3	1	1	1	2	1	2	0	5	0	0	1	3	2	3	1
303	sp|O15020|SPTN2_HUMAN	sp|O15020|SPTN2_HUMAN Spectrin beta chain, non-erythrocytic 2 OS=Homo sapiens GN=SPTBN2 PE=1 SV=3	272525.63	0	0	0	0	1	0	0	1	0	0	1	0	0	0	0	0	0	0	1	0	0	1	0	0	1	0	0	0	0	0	0	0	1	0	0	1	0	0	1	1	0	0
304	sp|Q5JNZ5|RS26L_HUMAN	sp|Q5JNZ5|RS26L_HUMAN Putative 40S ribosomal protein S26-like 1 OS=Homo sapiens GN=RPS26P11 PE=5 SV=1	13336.1	1	1	1	2	2	1	1	2	1	2	2	3	2	2	1	1	1	1	1	1	1	1	1	1	1	1	1	1	1	1	1	1	1	1	1	1	1	1	1	1	1	1
305	sp|Q14103|HNRPD_HUMAN	sp|Q14103|HNRPD_HUMAN Heterogeneous nuclear ribonucleoprotein D0 OS=Homo sapiens GN=HNRNPD PE=1 SV=1	38581.37	2	1	2	2	0	2	1	1	2	1	2	3	2	2	2	1	2	2	0	2	1	1	2	1	2	2	2	2	2	1	2	2	0	2	1	1	2	1	2	2	2	2
306	sp|P05388|RLA0_HUMAN	sp|P05388|RLA0_HUMAN 60S acidic ribosomal protein P0 OS=Homo sapiens GN=RPLP0 PE=1 SV=1	34422.86	1	3	1	3	1	2	1	2	1	2	1	2	2	1	1	1	1	1	1	1	1	1	1	1	1	1	1	1	1	1	1	1	1	1	1	1	1	1	1	1	1	1
307	sp|P59665|DEF1_HUMAN	sp|P59665|DEF1_HUMAN Neutrophil defensin 1 OS=Homo sapiens GN=DEFA1 PE=1 SV=1	10536.31	2	1	2	2	2	3	2	4	1	3	2	4	3	4	1	1	1	1	1	1	1	2	1	1	1	2	1	2	1	1	1	1	1	1	1	2	1	1	1	2	1	2
308	sp|Q01432|AMPD3_HUMAN	sp|Q01432|AMPD3_HUMAN AMP deaminase 3 OS=Homo sapiens GN=AMPD3 PE=1 SV=1	89268.83	1	1	0	1	2	0	2	3	1	3	2	3	2	2	1	1	0	1	2	0	2	3	1	2	2	3	2	2	1	1	0	1	2	0	2	3	1	2	2	3	2	2
309	sp|P26599|PTBP1_HUMAN	sp|P26599|PTBP1_HUMAN Polypyrimidine tract-binding protein 1 OS=Homo sapiens GN=PTBP1 PE=1 SV=1	57356.7	2	1	2	1	4	1	2	2	2	1	2	1	1	1	2	1	2	1	4	1	2	2	2	1	2	1	1	1	2	1	2	1	4	1	2	2	2	1	2	1	1	1
310	sp|P02765|FETUA_HUMAN	sp|P02765|FETUA_HUMAN Alpha-2-HS-glycoprotein OS=Homo sapiens GN=AHSG PE=1 SV=1	40098.01	1	2	1	2	2	2	1	2	1	2	1	2	2	2	1	1	1	1	1	1	1	1	1	1	1	1	1	1	1	1	1	1	1	1	1	1	1	1	1	1	1	1
311	sp|P41250|SYG_HUMAN	sp|P41250|SYG_HUMAN Glycine--tRNA ligase OS=Homo sapiens GN=GARS PE=1 SV=3	83853.89	1	2	2	1	0	1	2	1	1	2	3	3	1	3	1	2	2	1	0	1	1	1	1	2	2	3	1	2	1	2	2	1	0	1	1	1	1	2	2	3	1	2
312	sp|P19827|ITIH1_HUMAN	sp|P19827|ITIH1_HUMAN Inter-alpha-trypsin inhibitor heavy chain H1 OS=Homo sapiens GN=ITIH1 PE=1 SV=3	101781.79	2	2	4	3	1	2	1	1	1	1	2	1	1	1	2	2	2	2	1	2	1	1	1	1	1	1	1	1	2	2	2	2	1	2	1	1	1	1	1	1	1	1
313	sp|P62879|GBB2_HUMAN	sp|P62879|GBB2_HUMAN Guanine nucleotide-binding protein G(I)/G(S)/G(T) subunit beta-2 OS=Homo sapiens GN=GNB2 PE=1 SV=3	38048.34	0	4	1	3	2	4	0	4	0	4	1	2	0	3	0	3	1	2	2	3	0	3	0	2	1	1	0	3	0	3	1	2	2	3	0	3	0	2	1	1	0	3
313	sp|Q9HAV0|GBB4_HUMAN	sp|Q9HAV0|GBB4_HUMAN Guanine nucleotide-binding protein subunit beta-4 OS=Homo sapiens GN=GNB4 PE=1 SV=3	38284.3	0	0	0	0	0	0	0	0	0	1	0	0	0	1	0	0	0	0	0	0	0	0	0	1	0	0	0	1	0	2	0	2	1	2	0	2	0	3	0	1	0	3
314	sp|P43490|NAMPT_HUMAN	sp|P43490|NAMPT_HUMAN Nicotinamide phosphoribosyltransferase OS=Homo sapiens GN=NAMPT PE=1 SV=1	55771.7	2	2	2	1	2	1	2	1	2	1	2	1	2	2	1	1	1	1	1	1	1	1	1	1	1	1	1	1	1	1	1	1	1	1	1	1	1	1	1	1	1	1
315	sp|P52565|GDIR1_HUMAN	sp|P52565|GDIR1_HUMAN Rho GDP-dissociation inhibitor 1 OS=Homo sapiens GN=ARHGDIA PE=1 SV=3	23249.73	2	1	2	2	2	2	1	2	2	1	1	1	2	2	2	1	2	2	2	1	1	2	2	1	1	1	2	2	2	1	2	2	2	1	1	2	2	1	1	1	2	2
316	sp|Q00796|DHSO_HUMAN	sp|Q00796|DHSO_HUMAN Sorbitol dehydrogenase OS=Homo sapiens GN=SORD PE=1 SV=4	38927.05	3	0	3	0	3	0	4	0	4	0	3	0	3	0	3	0	3	0	3	0	3	0	4	0	3	0	3	0	3	0	3	0	3	0	3	0	4	0	3	0	3	0
317	sp|Q8WWA0|ITLN1_HUMAN	sp|Q8WWA0|ITLN1_HUMAN Intelectin-1 OS=Homo sapiens GN=ITLN1 PE=1 SV=1	35509.52	0	3	0	4	0	3	0	2	0	4	0	3	0	3	0	2	0	2	0	2	0	1	0	2	0	2	0	2	0	2	0	2	0	2	0	1	0	2	0	2	0	2
318	sp|O00391|QSOX1_HUMAN	sp|O00391|QSOX1_HUMAN Sulfhydryl oxidase 1 OS=Homo sapiens GN=QSOX1 PE=1 SV=3	83323.81	0	2	0	1	1	1	3	4	2	2	2	2	1	1	0	2	0	1	1	1	2	3	1	2	2	2	1	1	0	2	0	1	1	1	2	3	1	2	2	2	1	1
319	sp|P98160|PGBM_HUMAN	sp|P98160|PGBM_HUMAN Basement membrane-specific heparan sulfate proteoglycan core protein OS=Homo sapiens GN=HSPG2 PE=1 SV=4	479252.51	2	0	3	0	2	0	3	0	3	0	3	0	5	1	2	0	3	0	2	0	3	0	3	0	3	0	5	1	2	0	3	0	2	0	3	0	3	0	3	0	5	1
320	sp|P49327|FAS_HUMAN	sp|P49327|FAS_HUMAN Fatty acid synthase OS=Homo sapiens GN=FASN PE=1 SV=3	275877.27	3	1	2	1	1	1	1	1	2	2	1	2	3	1	2	1	2	1	1	1	1	1	1	1	1	1	2	1	2	1	2	1	1	1	1	1	1	1	1	1	2	1
321	sp|Q02487|DSC2_HUMAN	sp|Q02487|DSC2_HUMAN Desmocollin-2 OS=Homo sapiens GN=DSC2 PE=1 SV=1	101324.28	2	1	1	2	1	2	2	3	1	2	2	2	0	1	2	1	1	1	1	1	2	2	1	1	2	1	0	1	2	1	1	1	1	1	2	2	1	1	2	1	0	1
322	sp|P20810|ICAL_HUMAN	sp|P20810|ICAL_HUMAN Calpastatin OS=Homo sapiens GN=CAST PE=1 SV=4	76925.42	1	1	2	0	2	1	2	1	3	2	2	2	2	1	1	1	2	0	2	1	2	1	2	2	2	2	2	1	1	1	2	0	2	1	2	1	2	2	2	2	2	1
323	sp|P32320|CDD_HUMAN	sp|P32320|CDD_HUMAN Cytidine deaminase OS=Homo sapiens GN=CDA PE=1 SV=2	16687.05	1	2	1	2	2	2	1	2	1	1	1	2	2	2	1	1	1	1	1	1	1	1	1	1	1	1	1	1	1	1	1	1	1	1	1	1	1	1	1	1	1	1
324	sp|P62316|SMD2_HUMAN	sp|P62316|SMD2_HUMAN Small nuclear ribonucleoprotein Sm D2 OS=Homo sapiens GN=SNRPD2 PE=1 SV=1	13632.27	1	2	1	3	1	2	0	3	0	3	1	2	0	3	1	2	1	3	1	2	0	3	0	3	1	2	0	3	1	2	1	3	1	2	0	3	0	3	1	2	0	3
325	sp|Q8IUE6|H2A2B_HUMAN	sp|Q8IUE6|H2A2B_HUMAN Histone H2A type 2-B OS=Homo sapiens GN=HIST2H2AB PE=1 SV=3	13986.84	0	2	1	3	0	2	2	3	1	3	0	3	0	2	0	1	1	1	0	1	1	1	1	1	0	1	0	1	0	1	1	1	0	1	1	1	1	1	0	1	0	1
326	sp|P24539|AT5F1_HUMAN	sp|P24539|AT5F1_HUMAN ATP synthase F(0) complex subunit B1, mitochondrial OS=Homo sapiens GN=ATP5F1 PE=1 SV=2	28947.36	2	2	2	2	1	1	2	1	1	2	2	2	1	1	1	1	1	1	1	1	1	1	1	1	1	1	1	1	1	1	1	1	1	1	1	1	1	1	1	1	1	1
327	sp|P05455|LA_HUMAN	sp|P05455|LA_HUMAN Lupus La protein OS=Homo sapiens GN=SSB PE=1 SV=2	46979.22	1	2	1	1	2	2	2	1	1	2	2	1	2	2	1	1	1	1	1	1	1	1	1	1	1	1	1	1	1	1	1	1	1	1	1	1	1	1	1	1	1	1
328	sp|Q14847|LASP1_HUMAN	sp|Q14847|LASP1_HUMAN LIM and SH3 domain protein 1 OS=Homo sapiens GN=LASP1 PE=1 SV=2	30097.37	2	1	3	2	0	1	2	2	2	1	0	2	2	1	2	1	3	2	0	1	2	2	2	1	0	2	2	1	2	1	3	2	0	1	2	2	2	1	0	2	2	1
329	sp|P10319|1B58_HUMAN	sp|P10319|1B58_HUMAN HLA class I histocompatibility antigen, B-58 alpha chain OS=Homo sapiens GN=HLA-B PE=1 SV=1	40597.15	5	2	2	3	2	4	2	3	3	2	4	3	3	3	2	1	1	1	1	2	1	2	2	1	2	1	2	1	2	1	1	1	1	2	1	2	2	1	2	1	2	1
329	sp|P10316|1A69_HUMAN	sp|P10316|1A69_HUMAN HLA class I histocompatibility antigen, A-69 alpha chain OS=Homo sapiens GN=HLA-A PE=1 SV=2	41236.28	0	0	0	0	0	0	0	0	0	0	0	0	1	0	0	0	0	0	0	0	0	0	0	0	0	0	1	0	1	0	0	0	0	0	0	0	1	0	1	0	1	0
330	sp|P40227|TCPZ_HUMAN	sp|P40227|TCPZ_HUMAN T-complex protein 1 subunit zeta OS=Homo sapiens GN=CCT6A PE=1 SV=3	58443.77	3	1	1	1	1	1	3	1	1	2	2	1	2	1	3	1	1	1	1	1	2	1	1	1	2	1	2	1	3	1	1	1	1	1	2	1	1	1	2	1	2	1
331	sp|P61254|RL26_HUMAN	sp|P61254|RL26_HUMAN 60S ribosomal protein L26 OS=Homo sapiens GN=RPL26 PE=1 SV=1	17247.53	1	2	1	2	1	2	1	2	1	2	1	2	1	2	1	2	1	2	1	2	1	2	1	2	1	2	1	2	1	2	1	2	1	2	1	2	1	2	1	2	1	2
332	sp|P27635|RL10_HUMAN	sp|P27635|RL10_HUMAN 60S ribosomal protein L10 OS=Homo sapiens GN=RPL10 PE=1 SV=4	25044.04	2	1	0	2	1	1	1	3	2	1	2	2	1	2	2	1	0	2	1	1	1	2	2	1	2	1	1	2	2	1	0	2	1	1	1	2	2	1	2	1	1	2
333	sp|P36578|RL4_HUMAN	sp|P36578|RL4_HUMAN 60S ribosomal protein L4 OS=Homo sapiens GN=RPL4 PE=1 SV=5	47952.53	0	2	1	2	1	2	0	2	2	1	2	2	2	2	0	2	1	2	1	2	0	2	2	1	2	2	2	2	0	2	1	2	1	2	0	2	2	1	2	2	2	2
334	sp|P19971|TYPH_HUMAN	sp|P19971|TYPH_HUMAN Thymidine phosphorylase OS=Homo sapiens GN=TYMP PE=1 SV=2	50323.32	1	2	2	1	2	2	3	1	2	0	1	1	2	1	1	2	2	1	2	2	2	1	2	0	1	1	2	1	1	2	2	1	2	2	2	1	2	0	1	1	2	1
335	sp|P62081|RS7_HUMAN	sp|P62081|RS7_HUMAN 40S ribosomal protein S7 OS=Homo sapiens GN=RPS7 PE=1 SV=1	22113.26	0	2	2	1	1	2	1	2	1	2	2	2	0	2	0	2	2	1	1	2	1	2	1	2	2	2	0	2	0	2	2	1	1	2	1	2	1	2	2	2	0	2
336	sp|Q9H1E1|RNAS7_HUMAN	sp|Q9H1E1|RNAS7_HUMAN Ribonuclease 7 OS=Homo sapiens GN=RNASE7 PE=1 SV=2	17921.11	1	1	1	4	1	1	1	3	1	2	1	1	1	1	1	1	1	2	1	1	1	1	1	1	1	1	1	1	1	1	1	2	1	1	1	1	1	1	1	1	1	1
337	sp|P01011|AACT_HUMAN	sp|P01011|AACT_HUMAN Alpha-1-antichymotrypsin OS=Homo sapiens GN=SERPINA3 PE=1 SV=2	47791.6	4	2	3	2	4	0	0	0	3	1	0	1	0	0	1	1	1	1	1	0	0	0	1	1	0	1	0	0	1	1	1	1	1	0	0	0	1	1	0	1	0	0
338	sp|P78417|GSTO1_HUMAN	sp|P78417|GSTO1_HUMAN Glutathione S-transferase omega-1 OS=Homo sapiens GN=GSTO1 PE=1 SV=2	27833.15	2	1	1	1	2	1	2	1	2	1	2	1	3	0	1	1	1	1	1	1	1	1	1	1	1	1	1	0	1	1	1	1	1	1	1	1	1	1	1	1	1	0
339	sp|P00492|HPRT_HUMAN	sp|P00492|HPRT_HUMAN Hypoxanthine-guanine phosphoribosyltransferase OS=Homo sapiens GN=HPRT1 PE=1 SV=2	24791.69	2	1	2	1	2	1	2	1	2	1	2	1	2	0	1	1	1	1	1	1	1	1	1	1	1	1	1	0	1	1	1	1	1	1	1	1	1	1	1	1	1	0
340	sp|P61916|NPC2_HUMAN	sp|P61916|NPC2_HUMAN Epididymal secretory protein E1 OS=Homo sapiens GN=NPC2 PE=1 SV=1	16901.61	2	1	4	0	3	1	1	1	2	0	3	0	2	0	2	1	3	0	2	1	1	1	2	0	2	0	1	0	2	1	3	0	2	1	1	1	2	0	2	0	1	0
341	sp|Q04637|IF4G1_HUMAN	sp|Q04637|IF4G1_HUMAN Eukaryotic translation initiation factor 4 gamma 1 OS=Homo sapiens GN=EIF4G1 PE=1 SV=4	176123.54	1	2	1	2	0	2	1	2	1	1	1	2	2	2	1	2	1	2	0	2	1	2	1	1	1	2	2	2	1	2	1	2	0	2	1	2	1	1	1	2	2	2
342	sp|P52789|HXK2_HUMAN	sp|P52789|HXK2_HUMAN Hexokinase-2 OS=Homo sapiens GN=HK2 PE=1 SV=2	103739.0	2	1	2	2	2	1	2	1	1	1	2	1	1	1	2	1	2	2	2	1	2	1	1	1	2	1	1	1	2	1	2	2	2	1	2	1	1	1	2	1	1	1
343	sp|P50991|TCPD_HUMAN	sp|P50991|TCPD_HUMAN T-complex protein 1 subunit delta OS=Homo sapiens GN=CCT4 PE=1 SV=4	58400.95	2	1	1	1	2	2	1	2	1	1	1	1	2	2	2	1	1	1	2	1	1	2	1	1	1	1	2	1	2	1	1	1	2	1	1	2	1	1	1	1	2	1
344	sp|P48163|MAOX_HUMAN	sp|P48163|MAOX_HUMAN NADP-dependent malic enzyme OS=Homo sapiens GN=ME1 PE=1 SV=1	64679.28	3	1	2	0	1	1	2	1	2	1	1	1	2	2	3	1	2	0	1	1	2	1	2	1	1	1	2	2	3	1	2	0	1	1	2	1	2	1	1	1	2	2
345	sp|P54136|SYRC_HUMAN	sp|P54136|SYRC_HUMAN Arginine--tRNA ligase, cytoplasmic OS=Homo sapiens GN=RARS PE=1 SV=2	76129.16	1	2	1	2	1	2	1	2	1	1	0	2	1	3	1	2	1	2	1	2	1	2	1	1	0	2	1	3	1	2	1	2	1	2	1	2	1	1	0	2	1	3
346	sp|Q99460|PSMD1_HUMAN	sp|Q99460|PSMD1_HUMAN 26S proteasome non-ATPase regulatory subunit 1 OS=Homo sapiens GN=PSMD1 PE=1 SV=2	106795.08	2	0	2	1	2	1	1	1	3	1	1	2	0	2	2	0	1	1	2	1	1	1	3	1	1	2	0	2	2	0	1	1	2	1	1	1	3	1	1	2	0	2
347	sp|P07948|LYN_HUMAN	sp|P07948|LYN_HUMAN Tyrosine-protein kinase Lyn OS=Homo sapiens GN=LYN PE=1 SV=3	58992.97	1	2	1	2	1	2	1	1	1	2	1	1	1	2	1	1	1	1	1	1	1	1	1	1	1	1	1	1	1	1	1	1	1	1	1	1	1	1	1	1	1	1
348	sp|Q9HDC9|APMAP_HUMAN	sp|Q9HDC9|APMAP_HUMAN Adipocyte plasma membrane-associated protein OS=Homo sapiens GN=APMAP PE=1 SV=2	46621.91	0	4	0	3	0	3	0	2	0	3	0	2	0	2	0	2	0	2	0	2	0	1	0	2	0	1	0	2	0	2	0	2	0	2	0	1	0	2	0	1	0	2
349	sp|Q9UQ80|PA2G4_HUMAN	sp|Q9UQ80|PA2G4_HUMAN Proliferation-associated protein 2G4 OS=Homo sapiens GN=PA2G4 PE=1 SV=3	44101.32	0	2	0	2	1	3	0	2	1	1	0	2	1	4	0	2	0	2	1	3	0	2	1	1	0	2	1	4	0	2	0	2	1	3	0	2	1	1	0	2	1	4
350	sp|P28070|PSB4_HUMAN	sp|P28070|PSB4_HUMAN Proteasome subunit beta type-4 OS=Homo sapiens GN=PSMB4 PE=1 SV=4	29242.5	2	0	2	1	1	1	2	0	2	1	2	1	2	2	1	0	1	1	1	1	1	0	1	1	1	1	1	1	1	0	1	1	1	1	1	0	1	1	1	1	1	1
351	sp|P09758|TACD2_HUMAN	sp|P09758|TACD2_HUMAN Tumor-associated calcium signal transducer 2 OS=Homo sapiens GN=TACSTD2 PE=1 SV=3	36370.87	2	2	2	1	1	1	0	2	0	0	1	3	2	2	1	1	2	1	1	1	0	1	0	0	1	1	2	1	1	1	2	1	1	1	0	1	0	0	1	1	2	1
352	sp|P32926|DSG3_HUMAN	sp|P32926|DSG3_HUMAN Desmoglein-3 OS=Homo sapiens GN=DSG3 PE=1 SV=2	108833.88	1	2	1	1	1	2	1	3	1	1	0	2	1	2	1	2	1	1	1	2	1	2	1	1	0	2	1	2	1	2	1	1	1	2	1	2	1	1	0	2	1	2
353	sp|O15143|ARC1B_HUMAN	sp|O15143|ARC1B_HUMAN Actin-related protein 2/3 complex subunit 1B OS=Homo sapiens GN=ARPC1B PE=1 SV=3	41721.72	1	1	2	1	0	2	1	2	0	1	2	3	2	1	1	1	2	1	0	2	1	2	0	1	2	3	2	1	1	1	2	1	0	2	1	2	0	1	2	3	2	1
354	sp|P00387|NB5R3_HUMAN	sp|P00387|NB5R3_HUMAN NADH-cytochrome b5 reductase 3 OS=Homo sapiens GN=CYB5R3 PE=1 SV=3	34440.81	1	2	1	1	1	2	1	1	0	2	2	2	1	2	1	1	1	1	1	1	1	1	0	1	2	2	1	1	1	1	1	1	1	1	1	1	0	1	2	2	1	1
355	sp|P33241|LSP1_HUMAN	sp|P33241|LSP1_HUMAN Lymphocyte-specific protein 1 OS=Homo sapiens GN=LSP1 PE=1 SV=1	37397.09	1	1	0	2	1	3	1	2	1	2	1	2	1	1	1	1	0	2	1	2	1	1	1	2	1	2	1	1	1	1	0	2	1	2	1	1	1	2	1	2	1	1
356	sp|P25788|PSA3_HUMAN	sp|P25788|PSA3_HUMAN Proteasome subunit alpha type-3 OS=Homo sapiens GN=PSMA3 PE=1 SV=2	28643.17	0	1	1	1	3	0	3	2	3	2	1	1	1	0	0	1	1	1	2	0	2	1	2	1	1	1	1	0	0	1	1	1	2	0	2	1	2	1	1	1	1	0
357	sp|P17980|PRS6A_HUMAN	sp|P17980|PRS6A_HUMAN 26S protease regulatory subunit 6A OS=Homo sapiens GN=PSMC3 PE=1 SV=3	49457.56	0	1	1	2	1	1	1	2	1	2	2	2	2	1	0	1	1	2	1	1	1	2	1	2	2	2	2	1	0	1	1	2	1	1	1	2	1	2	2	2	2	1
358	sp|Q13228|SBP1_HUMAN	sp|Q13228|SBP1_HUMAN Selenium-binding protein 1 OS=Homo sapiens GN=SELENBP1 PE=1 SV=2	52927.84	2	1	3	0	2	1	2	1	2	1	2	0	1	1	1	1	2	0	1	1	1	1	1	1	1	0	1	1	1	1	2	0	1	1	1	1	1	1	1	0	1	1
359	sp|P07858|CATB_HUMAN	sp|P07858|CATB_HUMAN Cathepsin B OS=Homo sapiens GN=CTSB PE=1 SV=3	38766.2	1	1	2	2	1	1	1	1	1	2	1	2	1	2	1	1	2	2	1	1	1	1	1	2	1	2	1	2	1	1	2	2	1	1	1	1	1	2	1	2	1	2
360	sp|P39019|RS19_HUMAN	sp|P39019|RS19_HUMAN 40S ribosomal protein S19 OS=Homo sapiens GN=RPS19 PE=1 SV=2	16050.53	1	2	1	1	0	2	1	3	1	1	1	1	2	2	1	1	1	1	0	1	1	2	1	1	1	1	2	2	1	1	1	1	0	1	1	2	1	1	1	1	2	2
361	sp|P30086|PEBP1_HUMAN	sp|P30086|PEBP1_HUMAN Phosphatidylethanolamine-binding protein 1 OS=Homo sapiens GN=PEBP1 PE=1 SV=3	21157.71	2	1	1	1	2	1	2	1	1	1	1	1	2	1	1	1	1	1	1	1	1	1	1	1	1	1	1	1	1	1	1	1	1	1	1	1	1	1	1	1	1	1
362	sp|P84098|RL19_HUMAN	sp|P84098|RL19_HUMAN 60S ribosomal protein L19 OS=Homo sapiens GN=RPL19 PE=1 SV=1	23565.29	1	1	1	2	0	2	0	3	1	2	0	2	0	3	1	1	1	2	0	2	0	3	1	2	0	2	0	3	1	1	1	2	0	2	0	3	1	2	0	2	0	3
363	sp|P05156|CFAI_HUMAN	sp|P05156|CFAI_HUMAN Complement factor I OS=Homo sapiens GN=CFI PE=1 SV=2	68101.51	1	1	2	1	1	1	0	1	3	1	2	1	2	1	1	1	2	1	1	1	0	1	3	1	2	1	2	1	1	1	2	1	1	1	0	1	3	1	2	1	2	1
364	sp|P53396|ACLY_HUMAN	sp|P53396|ACLY_HUMAN ATP-citrate synthase OS=Homo sapiens GN=ACLY PE=1 SV=3	121674.22	1	1	1	2	2	1	2	1	2	1	2	1	0	1	1	1	1	2	2	1	2	1	2	1	1	1	0	1	1	1	1	2	2	1	2	1	2	1	1	1	0	1
365	sp|Q9BRF8|CPPED_HUMAN	sp|Q9BRF8|CPPED_HUMAN Serine/threonine-protein phosphatase CPPED1 OS=Homo sapiens GN=CPPED1 PE=1 SV=3	35868.01	2	2	1	2	3	0	0	1	3	1	0	1	0	2	2	1	1	1	2	0	0	1	2	1	0	1	0	1	2	1	1	1	2	0	0	1	2	1	0	1	0	1
366	sp|Q9NQC3|RTN4_HUMAN	sp|Q9NQC3|RTN4_HUMAN Reticulon-4 OS=Homo sapiens GN=RTN4 PE=1 SV=2	130250.34	1	2	1	1	1	2	1	1	0	2	1	2	1	2	1	1	1	1	1	1	1	1	0	1	1	1	1	1	1	1	1	1	1	1	1	1	0	1	1	1	1	1
367	sp|Q16651|PRSS8_HUMAN	sp|Q16651|PRSS8_HUMAN Prostasin OS=Homo sapiens GN=PRSS8 PE=1 SV=1	37092.51	1	1	2	1	1	1	2	1	1	1	2	1	2	1	1	1	1	1	1	1	1	1	1	1	1	1	1	1	1	1	1	1	1	1	1	1	1	1	1	1	1	1
368	sp|A0M8Q6|LAC7_HUMAN	sp|A0M8Q6|LAC7_HUMAN Ig lambda-7 chain C region OS=Homo sapiens GN=IGLC7 PE=4 SV=2	11466.7	2	1	2	2	1	1	0	1	2	1	2	0	1	1	1	1	1	1	1	1	0	1	1	1	1	0	1	1	1	1	1	1	1	1	0	1	1	1	1	0	1	1
369	sp|P47914|RL29_HUMAN	sp|P47914|RL29_HUMAN 60S ribosomal protein L29 OS=Homo sapiens GN=RPL29 PE=1 SV=2	17798.08	2	2	0	1	2	0	1	1	3	1	1	1	1	1	1	2	0	1	1	0	1	1	2	1	1	1	1	1	1	2	0	1	1	0	1	1	2	1	1	1	1	1
370	sp|P45880|VDAC2_HUMAN	sp|P45880|VDAC2_HUMAN Voltage-dependent anion-selective channel protein 2 OS=Homo sapiens GN=VDAC2 PE=1 SV=2	32059.74	2	2	0	2	1	1	1	1	1	2	1	1	0	2	1	1	0	1	1	1	1	1	1	1	1	1	0	1	1	1	0	1	1	1	1	1	1	1	1	1	0	1
371	sp|Q07960|RHG01_HUMAN	sp|Q07960|RHG01_HUMAN Rho GTPase-activating protein 1 OS=Homo sapiens GN=ARHGAP1 PE=1 SV=1	50461.21	1	2	1	2	1	1	1	1	1	2	0	2	1	1	1	1	1	2	1	1	1	1	1	1	0	1	1	1	1	1	1	2	1	1	1	1	1	1	0	1	1	1
372	sp|O95716|RAB3D_HUMAN	sp|O95716|RAB3D_HUMAN Ras-related protein Rab-3D OS=Homo sapiens GN=RAB3D PE=1 SV=1	24479.9	2	2	3	3	3	2	2	4	2	3	0	3	0	3	1	1	1	1	1	1	1	2	1	1	0	1	0	1	1	1	1	1	1	1	1	2	1	1	0	1	0	1
373	sp|P34096|RNAS4_HUMAN	sp|P34096|RNAS4_HUMAN Ribonuclease 4 OS=Homo sapiens GN=RNASE4 PE=1 SV=3	17285.54	1	1	1	2	1	0	0	2	1	2	1	1	2	2	1	1	1	1	1	0	0	1	1	1	1	1	2	1	1	1	1	1	1	0	0	1	1	1	1	1	2	1
374	sp|Q6XQN6|PNCB_HUMAN	sp|Q6XQN6|PNCB_HUMAN Nicotinate phosphoribosyltransferase OS=Homo sapiens GN=NAPRT PE=1 SV=2	58112.23	1	1	1	1	1	2	1	1	1	2	2	1	1	1	1	1	1	1	1	1	1	1	1	1	1	1	1	1	1	1	1	1	1	1	1	1	1	1	1	1	1	1
375	sp|P16401|H15_HUMAN	sp|P16401|H15_HUMAN Histone H1.5 OS=Homo sapiens GN=HIST1H1B PE=1 SV=3	22566.47	1	2	1	2	2	2	1	2	0	2	2	3	0	1	1	2	1	2	2	2	1	2	0	2	2	2	0	1	1	2	1	2	2	2	1	2	0	2	2	2	0	1
376	sp|O75131|CPNE3_HUMAN	sp|O75131|CPNE3_HUMAN Copine-3 OS=Homo sapiens GN=CPNE3 PE=1 SV=1	60947.45	1	2	1	2	0	2	1	1	1	2	0	2	1	1	1	2	1	2	0	2	1	1	1	2	0	2	1	1	1	2	1	2	0	2	1	1	1	2	0	2	1	1
377	sp|P36957|ODO2_HUMAN	sp|P36957|ODO2_HUMAN Dihydrolipoyllysine-residue succinyltransferase component of 2-oxoglutarate dehydrogenase complex, mitochondrial OS=Homo sapiens GN=DLST PE=1 SV=4	49066.59	1	1	2	2	1	2	1	1	0	1	2	1	1	1	1	1	1	1	1	1	1	1	0	1	1	1	1	1	1	1	1	1	1	1	1	1	0	1	1	1	1	1
378	sp|P11586|C1TC_HUMAN	sp|P11586|C1TC_HUMAN C-1-tetrahydrofolate synthase, cytoplasmic OS=Homo sapiens GN=MTHFD1 PE=1 SV=3	102179.56	2	0	2	0	2	0	2	0	2	1	2	1	2	1	2	0	2	0	2	0	2	0	2	1	2	1	2	1	2	0	2	0	2	0	2	0	2	1	2	1	2	1
379	sp|P49207|RL34_HUMAN	sp|P49207|RL34_HUMAN 60S ribosomal protein L34 OS=Homo sapiens GN=RPL34 PE=1 SV=3	13512.56	1	1	1	1	2	1	1	1	2	2	1	1	1	1	1	1	1	1	2	1	1	1	2	2	1	1	1	1	1	1	1	1	2	1	1	1	2	2	1	1	1	1
380	sp|Q9Y2A7|NCKP1_HUMAN	sp|Q9Y2A7|NCKP1_HUMAN Nck-associated protein 1 OS=Homo sapiens GN=NCKAP1 PE=1 SV=1	130018.01	1	2	0	1	1	2	2	1	1	1	2	0	2	1	1	2	0	1	1	2	2	1	1	1	2	0	2	1	1	2	0	1	1	2	2	1	1	1	2	0	2	1
381	sp|Q05315|LEG10_HUMAN	sp|Q05315|LEG10_HUMAN Galectin-10 OS=Homo sapiens GN=CLC PE=1 SV=3	16556.26	1	2	1	1	2	1	1	1	2	1	1	1	1	1	1	1	1	1	1	1	1	1	1	1	1	1	1	1	1	1	1	1	1	1	1	1	1	1	1	1	1	1
382	sp|P46777|RL5_HUMAN	sp|P46777|RL5_HUMAN 60S ribosomal protein L5 OS=Homo sapiens GN=RPL5 PE=1 SV=3	34568.78	1	1	1	1	0	0	0	2	1	1	2	3	0	4	1	1	1	1	0	0	0	1	1	1	2	2	0	3	1	1	1	1	0	0	0	1	1	1	2	2	0	3
383	sp|O60610|DIAP1_HUMAN	sp|O60610|DIAP1_HUMAN Protein diaphanous homolog 1 OS=Homo sapiens GN=DIAPH1 PE=1 SV=2	141941.8	1	1	0	2	0	2	0	2	0	1	2	2	2	2	1	1	0	2	0	1	0	1	0	1	1	1	1	1	1	1	0	2	0	1	0	1	0	1	1	1	1	1
384	sp|Q14247|SRC8_HUMAN	sp|Q14247|SRC8_HUMAN Src substrate cortactin OS=Homo sapiens GN=CTTN PE=1 SV=2	61719.6	1	1	2	1	1	1	2	1	2	1	1	1	1	1	1	1	2	1	1	1	2	1	2	1	1	1	1	1	1	1	2	1	1	1	2	1	2	1	1	1	1	1
385	sp|P06731|CEAM5_HUMAN	sp|P06731|CEAM5_HUMAN Carcinoembryonic antigen-related cell adhesion molecule 5 OS=Homo sapiens GN=CEACAM5 PE=1 SV=3	77488.51	1	1	1	2	1	2	1	1	1	1	1	1	1	2	1	1	1	1	1	1	1	1	1	1	1	1	1	1	1	1	1	1	1	1	1	1	1	1	1	1	1	1
386	sp|Q9Y265|RUVB1_HUMAN	sp|Q9Y265|RUVB1_HUMAN RuvB-like 1 OS=Homo sapiens GN=RUVBL1 PE=1 SV=1	50538.44	1	2	1	1	1	1	1	1	1	1	1	2	1	2	1	1	1	1	1	1	1	1	1	1	1	1	1	1	1	1	1	1	1	1	1	1	1	1	1	1	1	1
387	sp|P00390|GSHR_HUMAN	sp|P00390|GSHR_HUMAN Glutathione reductase, mitochondrial OS=Homo sapiens GN=GSR PE=1 SV=2	56791.17	2	0	2	1	1	1	2	1	0	2	1	1	2	1	1	0	2	1	1	1	2	1	0	2	1	1	1	1	1	0	2	1	1	1	2	1	0	2	1	1	1	1
388	sp|Q1KMD3|HNRL2_HUMAN	sp|Q1KMD3|HNRL2_HUMAN Heterogeneous nuclear ribonucleoprotein U-like protein 2 OS=Homo sapiens GN=HNRNPUL2 PE=1 SV=1	85622.38	2	0	2	0	2	0	1	1	2	1	2	1	2	1	1	0	2	0	1	0	1	1	1	1	1	1	1	1	1	0	2	0	1	0	1	1	1	1	1	1	1	1
389	sp|P14598|NCF1_HUMAN	sp|P14598|NCF1_HUMAN Neutrophil cytosol factor 1 OS=Homo sapiens GN=NCF1 PE=1 SV=3	44851.96	0	2	0	2	1	2	0	1	0	3	1	2	1	1	0	2	0	2	1	2	0	1	0	3	1	2	1	1	0	2	0	2	1	2	0	1	0	3	1	2	1	1
390	sp|P04114|APOB_HUMAN	sp|P04114|APOB_HUMAN Apolipoprotein B-100 OS=Homo sapiens GN=APOB PE=1 SV=2	516651.42	3	0	1	1	0	1	1	0	2	2	1	3	0	1	3	0	1	1	0	1	1	0	2	2	1	3	0	1	3	0	1	1	0	1	1	0	2	2	1	3	0	1
391	sp|Q15257|PTPA_HUMAN	sp|Q15257|PTPA_HUMAN Serine/threonine-protein phosphatase 2A activator OS=Homo sapiens GN=PPP2R4 PE=1 SV=3	41097.61	0	1	1	1	1	1	1	1	1	1	2	1	2	2	0	1	1	1	1	1	1	1	1	1	2	1	2	2	0	1	1	1	1	1	1	1	1	1	2	1	2	2
392	sp|P14735|IDE_HUMAN	sp|P14735|IDE_HUMAN Insulin-degrading enzyme OS=Homo sapiens GN=IDE PE=1 SV=4	118691.57	0	0	1	1	3	1	1	2	1	1	1	2	1	1	0	0	1	1	3	1	1	2	1	1	1	2	1	1	0	0	1	1	3	1	1	2	1	1	1	2	1	1
393	sp|Q13296|SG2A2_HUMAN	sp|Q13296|SG2A2_HUMAN Mammaglobin-A OS=Homo sapiens GN=SCGB2A2 PE=1 SV=1	10720.21	1	2	1	2	1	1	1	0	0	2	1	1	1	2	1	1	1	1	1	1	1	0	0	1	1	1	1	1	1	1	1	1	1	1	1	0	0	1	1	1	1	1
394	sp|P01714|LV319_HUMAN	sp|P01714|LV319_HUMAN Immunoglobulin lambda variable 3-19 OS=Homo sapiens GN=IGLV3-19 PE=1 SV=2	12205.92	1	0	1	0	2	0	3	1	2	1	2	1	2	0	1	0	1	0	2	0	2	1	1	1	2	1	1	0	1	0	1	0	2	0	2	1	1	1	2	1	1	0
395	sp|P08574|CY1_HUMAN	sp|P08574|CY1_HUMAN Cytochrome c1, heme protein, mitochondrial OS=Homo sapiens GN=CYC1 PE=1 SV=3	35741.1	1	1	1	1	1	1	2	1	0	2	0	2	2	1	1	1	1	1	1	1	1	1	0	1	0	1	1	1	1	1	1	1	1	1	1	1	0	1	0	1	1	1
396	sp|P22079|PERL_HUMAN	sp|P22079|PERL_HUMAN Lactoperoxidase OS=Homo sapiens GN=LPO PE=1 SV=2	81149.22	1	0	2	1	1	1	2	0	1	1	2	0	3	1	1	0	1	1	1	1	1	0	1	1	2	0	2	1	1	0	1	1	1	1	1	0	1	1	2	0	2	1
397	sp|Q8TDB8|GTR14_HUMAN	sp|Q8TDB8|GTR14_HUMAN Solute carrier family 2, facilitated glucose transporter member 14 OS=Homo sapiens GN=SLC2A14 PE=2 SV=1	56853.69	1	1	1	1	1	1	1	2	1	1	1	2	1	2	1	1	1	1	1	1	1	1	1	1	1	1	1	1	1	1	1	1	1	1	1	1	1	1	1	1	1	1
398	sp|O95171|SCEL_HUMAN	sp|O95171|SCEL_HUMAN Sciellin OS=Homo sapiens GN=SCEL PE=1 SV=2	78017.59	1	0	1	1	1	2	1	1	1	1	1	1	3	1	1	0	1	1	1	2	1	1	1	1	1	1	2	1	1	0	1	1	1	2	1	1	1	1	1	1	2	1
399	sp|P35221|CTNA1_HUMAN	sp|P35221|CTNA1_HUMAN Catenin alpha-1 OS=Homo sapiens GN=CTNNA1 PE=1 SV=1	100692.78	2	2	0	2	0	2	1	0	0	1	2	2	1	1	2	2	0	2	0	2	1	0	0	1	2	2	1	1	2	2	0	2	0	2	1	0	0	1	2	2	1	1
400	sp|P62917|RL8_HUMAN	sp|P62917|RL8_HUMAN 60S ribosomal protein L8 OS=Homo sapiens GN=RPL8 PE=1 SV=2	28235.37	1	2	2	1	0	1	1	1	1	1	2	2	0	1	1	2	1	1	0	1	1	1	1	1	2	2	0	1	1	2	1	1	0	1	1	1	1	1	2	2	0	1
401	sp|P07996|TSP1_HUMAN	sp|P07996|TSP1_HUMAN Thrombospondin-1 OS=Homo sapiens GN=THBS1 PE=1 SV=2	133291.06	0	1	0	2	0	2	0	3	0	2	0	3	0	3	0	1	0	1	0	1	0	2	0	1	0	2	0	2	0	1	0	1	0	1	0	2	0	1	0	2	0	2
402	sp|P52948|NUP98_HUMAN	sp|P52948|NUP98_HUMAN Nuclear pore complex protein Nup98-Nup96 OS=Homo sapiens GN=NUP98 PE=1 SV=4	198597.02	2	2	1	2	2	1	0	1	1	1	1	2	0	0	1	1	1	1	1	1	0	1	1	1	1	1	0	0	1	1	1	1	1	1	0	1	1	1	1	1	0	0
403	sp|P35606|COPB2_HUMAN	sp|P35606|COPB2_HUMAN Coatomer subunit beta' OS=Homo sapiens GN=COPB2 PE=1 SV=2	103277.81	1	1	1	0	1	1	1	1	2	1	2	1	2	1	1	1	1	0	1	1	1	1	2	1	1	1	1	1	1	1	1	0	1	1	1	1	2	1	1	1	1	1
404	sp|P54727|RD23B_HUMAN	sp|P54727|RD23B_HUMAN UV excision repair protein RAD23 homolog B OS=Homo sapiens GN=RAD23B PE=1 SV=1	43201.64	2	1	1	1	1	0	2	0	2	1	1	1	2	0	2	1	1	1	1	0	2	0	2	1	1	1	2	0	2	1	1	1	1	0	2	0	2	1	1	1	2	0
405	sp|P19367|HXK1_HUMAN	sp|P19367|HXK1_HUMAN Hexokinase-1 OS=Homo sapiens GN=HK1 PE=1 SV=3	103560.57	1	2	1	2	1	0	1	1	1	1	1	1	1	1	1	2	1	2	1	0	1	1	1	1	1	1	1	1	1	2	1	2	1	0	1	1	1	1	1	1	1	1
406	sp|P41218|MNDA_HUMAN	sp|P41218|MNDA_HUMAN Myeloid cell nuclear differentiation antigen OS=Homo sapiens GN=MNDA PE=1 SV=1	46092.33	0	1	0	2	1	1	1	3	0	2	0	3	0	1	0	1	0	1	1	1	1	3	0	1	0	2	0	1	0	1	0	1	1	1	1	3	0	1	0	2	0	1
407	sp|O00160|MYO1F_HUMAN	sp|O00160|MYO1F_HUMAN Unconventional myosin-If OS=Homo sapiens GN=MYO1F PE=1 SV=3	125507.11	0	1	0	2	0	2	0	3	0	3	0	2	0	2	0	1	0	2	0	2	0	3	0	3	0	2	0	2	0	1	0	2	0	2	0	3	0	3	0	2	0	2
408	sp|P31040|SDHA_HUMAN	SDHA_HUMAN Succinate dehydrogenase	73671.68	1	1	1	0	1	1	1	1	0	2	2	0	3	1	1	1	1	0	1	1	1	1	0	2	2	0	3	1	1	1	1	0	1	1	1	1	0	2	2	0	3	1
409	sp|Q10567|AP1B1_HUMAN	sp|Q10567|AP1B1_HUMAN AP-1 complex subunit beta-1 OS=Homo sapiens GN=AP1B1 PE=1 SV=2	105482.41	1	1	2	0	1	1	1	1	3	1	2	1	1	0	1	1	2	0	1	1	1	1	3	1	2	1	1	0	1	1	2	0	1	1	1	1	3	1	2	1	1	0
409	sp|P63010|AP2B1_HUMAN	sp|P63010|AP2B1_HUMAN AP-2 complex subunit beta OS=Homo sapiens GN=AP2B1 PE=1 SV=1	105398.38	0	0	1	0	0	0	0	0	0	0	1	0	1	0	0	0	1	0	0	0	0	0	0	0	1	0	1	0	0	0	2	0	0	1	0	0	2	0	2	1	2	0
410	sp|Q13231|CHIT1_HUMAN	sp|Q13231|CHIT1_HUMAN Chitotriosidase-1 OS=Homo sapiens GN=CHIT1 PE=1 SV=1	52218.57	1	2	1	1	1	1	1	0	1	1	1	1	1	2	1	2	1	1	1	1	1	0	1	1	1	1	1	1	1	2	1	1	1	1	1	0	1	1	1	1	1	1
411	sp|Q9P0G3|KLK14_HUMAN	sp|Q9P0G3|KLK14_HUMAN Kallikrein-14 OS=Homo sapiens GN=KLK14 PE=1 SV=2	29787.03	1	1	1	1	1	2	1	2	0	1	1	2	0	1	1	1	1	1	1	2	1	2	0	1	1	2	0	1	1	1	1	1	1	2	1	2	0	1	1	2	0	1
412	sp|Q13347|EIF3I_HUMAN	sp|Q13347|EIF3I_HUMAN Eukaryotic translation initiation factor 3 subunit I OS=Homo sapiens GN=EIF3I PE=1 SV=1	36877.76	1	1	1	1	1	0	1	1	1	1	2	2	1	1	1	1	1	1	1	0	1	1	1	1	2	2	1	1	1	1	1	1	1	0	1	1	1	1	2	2	1	1
413	sp|P02790|HEMO_HUMAN	sp|P02790|HEMO_HUMAN Hemopexin OS=Homo sapiens GN=HPX PE=1 SV=2	52384.55	3	0	2	0	3	0	1	0	2	0	2	0	2	0	2	0	1	0	2	0	1	0	2	0	1	0	2	0	2	0	1	0	2	0	1	0	2	0	1	0	2	0
414	sp|O75947|ATP5H_HUMAN	sp|O75947|ATP5H_HUMAN ATP synthase subunit d, mitochondrial OS=Homo sapiens GN=ATP5H PE=1 SV=3	18536.52	0	2	0	1	1	2	1	1	0	2	1	2	1	1	0	2	0	1	1	2	1	1	0	2	1	2	1	1	0	2	0	1	1	2	1	1	0	2	1	2	1	1
415	sp|P13010|XRCC5_HUMAN	sp|P13010|XRCC5_HUMAN X-ray repair cross-complementing protein 5 OS=Homo sapiens GN=XRCC5 PE=1 SV=3	83222.49	2	1	1	1	2	1	1	1	1	1	0	1	1	1	2	1	1	1	1	1	1	1	1	1	0	1	1	1	2	1	1	1	1	1	1	1	1	1	0	1	1	1
416	sp|P15153|RAC2_HUMAN	sp|P15153|RAC2_HUMAN Ras-related C3 botulinum toxin substrate 2 OS=Homo sapiens GN=RAC2 PE=1 SV=1	21814.23	2	1	2	1	2	0	0	0	1	1	1	1	1	2	1	1	1	1	1	0	0	0	1	1	1	1	1	1	1	1	1	1	1	0	0	0	1	1	1	1	1	1
417	sp|P48047|ATPO_HUMAN	sp|P48047|ATPO_HUMAN ATP synthase subunit O, mitochondrial OS=Homo sapiens GN=ATP5O PE=1 SV=1	23376.7	2	1	1	1	1	1	1	1	1	1	1	1	1	1	2	1	1	1	1	1	1	1	1	1	1	1	1	1	2	1	1	1	1	1	1	1	1	1	1	1	1	1
418	sp|Q13045|FLII_HUMAN	sp|Q13045|FLII_HUMAN Protein flightless-1 homolog OS=Homo sapiens GN=FLII PE=1 SV=2	146142.05	1	1	1	0	1	1	1	1	1	1	1	2	2	1	1	1	1	0	1	1	1	1	1	1	1	2	2	1	1	1	1	0	1	1	1	1	1	1	1	2	2	1
419	sp|Q7L576|CYFP1_HUMAN	sp|Q7L576|CYFP1_HUMAN Cytoplasmic FMR1-interacting protein 1 OS=Homo sapiens GN=CYFIP1 PE=1 SV=1	146742.35	1	1	1	0	1	1	1	1	3	1	1	1	1	1	1	1	1	0	1	1	1	1	3	1	1	1	1	1	1	1	1	0	1	1	1	1	3	1	1	1	1	1
420	sp|Q15369|ELOC_HUMAN	sp|Q15369|ELOC_HUMAN Transcription elongation factor B polypeptide 1 OS=Homo sapiens GN=TCEB1 PE=1 SV=1	12636.06	1	1	1	1	1	1	1	1	1	1	1	1	1	1	1	1	1	1	1	1	1	1	1	1	1	1	1	1	1	1	1	1	1	1	1	1	1	1	1	1	1	1
421	sp|P00491|PNPH_HUMAN	sp|P00491|PNPH_HUMAN Purine nucleoside phosphorylase OS=Homo sapiens GN=PNP PE=1 SV=2	32325.24	1	0	1	1	1	1	1	1	1	1	1	1	1	2	1	0	1	1	1	1	1	1	1	1	1	1	1	1	1	0	1	1	1	1	1	1	1	1	1	1	1	1
422	sp|P45974|UBP5_HUMAN	sp|P45974|UBP5_HUMAN Ubiquitin carboxyl-terminal hydrolase 5 OS=Homo sapiens GN=USP5 PE=1 SV=2	96637.68	2	1	0	1	1	1	1	2	1	2	0	0	1	1	2	1	0	1	1	1	1	2	1	2	0	0	1	1	2	1	0	1	1	1	1	2	1	2	0	0	1	1
423	sp|O60361|NDK8_HUMAN	sp|O60361|NDK8_HUMAN Putative nucleoside diphosphate kinase OS=Homo sapiens GN=NME2P1 PE=5 SV=1	15690.05	1	2	1	2	1	0	1	3	1	2	2	1	1	1	1	1	1	1	1	0	1	1	1	1	1	1	1	1	1	1	1	1	1	0	1	1	1	1	1	1	1	1
424	sp|Q6DD88|ATLA3_HUMAN	sp|Q6DD88|ATLA3_HUMAN Atlastin-3 OS=Homo sapiens GN=ATL3 PE=1 SV=1	60959.59	0	1	0	2	1	2	0	1	1	2	1	1	1	1	0	1	0	1	1	1	0	1	1	1	1	1	1	1	0	1	0	1	1	1	0	1	1	1	1	1	1	1
425	sp|P00966|ASSY_HUMAN	sp|P00966|ASSY_HUMAN Argininosuccinate synthase OS=Homo sapiens GN=ASS1 PE=1 SV=2	46786.07	1	1	1	1	1	1	1	1	1	1	1	1	1	1	1	1	1	1	1	1	1	1	1	1	1	1	1	1	1	1	1	1	1	1	1	1	1	1	1	1	1	1
426	sp|P25787|PSA2_HUMAN	sp|P25787|PSA2_HUMAN Proteasome subunit alpha type-2 OS=Homo sapiens GN=PSMA2 PE=1 SV=2	25996.31	1	1	1	1	1	1	1	1	1	1	1	1	1	1	1	1	1	1	1	1	1	1	1	1	1	1	1	1	1	1	1	1	1	1	1	1	1	1	1	1	1	1
427	sp|Q9BV40|VAMP8_HUMAN	sp|Q9BV40|VAMP8_HUMAN Vesicle-associated membrane protein 8 OS=Homo sapiens GN=VAMP8 PE=1 SV=1	11488.03	1	1	2	1	1	0	1	1	1	1	1	1	1	1	1	1	1	1	1	0	1	1	1	1	1	1	1	1	1	1	1	1	1	0	1	1	1	1	1	1	1	1
428	sp|P68431|H31_HUMAN	sp|P68431|H31_HUMAN Histone H3.1 OS=Homo sapiens GN=HIST1H3A PE=1 SV=2	15508.53	1	3	1	2	0	2	1	1	1	1	0	0	1	0	1	2	1	2	0	2	1	1	1	1	0	0	1	0	1	2	1	2	0	2	1	1	1	1	0	0	1	0
429	sp|P51571|SSRD_HUMAN	sp|P51571|SSRD_HUMAN Translocon-associated protein subunit delta OS=Homo sapiens GN=SSR4 PE=1 SV=1	19157.67	1	1	1	1	1	1	1	1	1	1	1	1	1	1	1	1	1	1	1	1	1	1	1	1	1	1	1	1	1	1	1	1	1	1	1	1	1	1	1	1	1	1
430	sp|P13804|ETFA_HUMAN	sp|P13804|ETFA_HUMAN Electron transfer flavoprotein subunit alpha, mitochondrial OS=Homo sapiens GN=ETFA PE=1 SV=1	35399.71	2	0	1	1	1	1	2	0	0	1	2	1	1	1	2	0	1	1	1	1	1	0	0	1	2	1	1	1	2	0	1	1	1	1	1	0	0	1	2	1	1	1
431	sp|P48595|SPB10_HUMAN	sp|P48595|SPB10_HUMAN Serpin B10 OS=Homo sapiens GN=SERPINB10 PE=1 SV=1	45487.96	1	0	1	0	1	0	2	1	1	1	2	0	3	1	1	0	1	0	1	0	2	1	1	1	2	0	3	1	1	0	1	0	1	0	2	1	1	1	2	0	3	1
432	sp|P01602|KV105_HUMAN	sp|P01602|KV105_HUMAN Immunoglobulin kappa variable 1-5 OS=Homo sapiens GN=IGKV1-5 PE=1 SV=2	12944.42	1	1	1	1	1	1	1	1	1	1	1	1	1	1	1	1	1	1	1	1	1	1	1	1	1	1	1	1	1	1	1	1	1	1	1	1	1	1	1	1	1	1
433	sp|Q8N1G4|LRC47_HUMAN	sp|Q8N1G4|LRC47_HUMAN Leucine-rich repeat-containing protein 47 OS=Homo sapiens GN=LRRC47 PE=1 SV=1	64003.95	1	2	1	1	0	1	0	2	1	1	0	2	0	2	1	2	1	1	0	1	0	2	1	1	0	2	0	2	1	2	1	1	0	1	0	2	1	1	0	2	0	2
434	sp|Q14980|NUMA1_HUMAN	sp|Q14980|NUMA1_HUMAN Nuclear mitotic apparatus protein 1 OS=Homo sapiens GN=NUMA1 PE=1 SV=2	239198.63	2	0	1	1	2	1	2	2	0	0	1	0	2	0	2	0	1	1	2	1	2	2	0	0	1	0	2	0	2	0	1	1	2	1	2	2	0	0	1	0	2	0
435	sp|P39023|RL3_HUMAN	sp|P39023|RL3_HUMAN 60S ribosomal protein L3 OS=Homo sapiens GN=RPL3 PE=1 SV=2	46364.87	0	2	1	1	1	1	1	1	0	2	0	1	1	2	0	2	1	1	1	1	1	1	0	2	0	1	1	2	0	2	1	1	1	1	1	1	0	2	0	1	1	2
436	sp|P28072|PSB6_HUMAN	sp|P28072|PSB6_HUMAN Proteasome subunit beta type-6 OS=Homo sapiens GN=PSMB6 PE=1 SV=4	25569.53	1	1	1	1	1	1	1	1	1	1	1	1	1	1	1	1	1	1	1	1	1	1	1	1	1	1	1	1	1	1	1	1	1	1	1	1	1	1	1	1	1	1
437	sp|P05089|ARGI1_HUMAN	sp|P05089|ARGI1_HUMAN Arginase-1 OS=Homo sapiens GN=ARG1 PE=1 SV=2	34884.36	1	1	1	1	1	0	1	3	2	0	0	2	1	0	1	1	1	1	1	0	1	2	2	0	0	2	1	0	1	1	1	1	1	0	1	2	2	0	0	2	1	0
438	sp|P22314|UBA1_HUMAN	sp|P22314|UBA1_HUMAN Ubiquitin-like modifier-activating enzyme 1 OS=Homo sapiens GN=UBA1 PE=1 SV=3	118857.74	1	1	1	1	0	1	1	0	1	1	2	1	2	1	1	1	1	1	0	1	1	0	1	1	2	1	2	1	1	1	1	1	0	1	1	0	1	1	2	1	2	1
439	sp|Q00341|VIGLN_HUMAN	sp|Q00341|VIGLN_HUMAN Vigilin OS=Homo sapiens GN=HDLBP PE=1 SV=2	141995.38	1	0	1	2	1	1	0	1	2	2	1	1	1	0	1	0	1	2	1	1	0	1	2	2	1	1	1	0	1	0	1	2	1	1	0	1	2	2	1	1	1	0
440	sp|Q9NUQ9|FA49B_HUMAN	sp|Q9NUQ9|FA49B_HUMAN Protein FAM49B OS=Homo sapiens GN=FAM49B PE=1 SV=1	37009.75	1	1	1	1	1	0	1	1	1	1	1	1	1	1	1	1	1	1	1	0	1	1	1	1	1	1	1	1	1	1	1	1	1	0	1	1	1	1	1	1	1	1
441	sp|P46781|RS9_HUMAN	sp|P46781|RS9_HUMAN 40S ribosomal protein S9 OS=Homo sapiens GN=RPS9 PE=1 SV=3	22634.58	1	1	1	0	1	2	1	1	1	0	1	2	0	1	1	1	1	0	1	2	1	1	1	0	1	2	0	1	1	1	1	0	1	2	1	1	1	0	1	2	0	1
442	sp|Q99436|PSB7_HUMAN	sp|Q99436|PSB7_HUMAN Proteasome subunit beta type-7 OS=Homo sapiens GN=PSMB7 PE=1 SV=1	30288.36	1	1	1	1	1	1	1	0	1	1	1	1	1	1	1	1	1	1	1	1	1	0	1	1	1	1	1	1	1	1	1	1	1	1	1	0	1	1	1	1	1	1
443	sp|O43240|KLK10_HUMAN	sp|O43240|KLK10_HUMAN Kallikrein-10 OS=Homo sapiens GN=KLK10 PE=1 SV=3	30834.59	0	1	1	1	1	1	1	1	1	1	1	1	1	1	0	1	1	1	1	1	1	1	1	1	1	1	1	1	0	1	1	1	1	1	1	1	1	1	1	1	1	1
444	sp|Q93084|AT2A3_HUMAN	sp|Q93084|AT2A3_HUMAN Sarcoplasmic/endoplasmic reticulum calcium ATPase 3 OS=Homo sapiens GN=ATP2A3 PE=1 SV=2	115443.94	1	1	1	1	0	2	1	0	1	0	1	2	0	2	1	1	1	1	0	2	1	0	1	0	1	2	0	2	1	1	1	1	0	2	1	0	1	0	1	2	0	2
445	sp|O00571|DDX3X_HUMAN	sp|O00571|DDX3X_HUMAN ATP-dependent RNA helicase DDX3X OS=Homo sapiens GN=DDX3X PE=1 SV=3	73597.15	1	1	1	0	1	2	1	1	0	1	0	2	0	2	1	1	1	0	1	2	1	1	0	1	0	2	0	2	1	1	1	0	1	2	1	1	0	1	0	2	0	2
446	sp|O95571|ETHE1_HUMAN	sp|O95571|ETHE1_HUMAN Persulfide dioxygenase ETHE1, mitochondrial OS=Homo sapiens GN=ETHE1 PE=1 SV=2	28368.3	1	1	1	1	1	1	1	1	1	1	0	1	1	1	1	1	1	1	1	1	1	1	1	1	0	1	1	1	1	1	1	1	1	1	1	1	1	1	0	1	1	1
447	sp|P17858|PFKAL_HUMAN	sp|P17858|PFKAL_HUMAN ATP-dependent 6-phosphofructokinase, liver type OS=Homo sapiens GN=PFKL PE=1 SV=6	85762.46	1	0	1	1	1	1	1	1	2	0	0	1	2	1	1	0	1	1	1	1	1	1	2	0	0	1	2	1	1	0	1	1	1	1	1	1	2	0	0	1	2	1
448	sp|Q14019|COTL1_HUMAN	sp|Q14019|COTL1_HUMAN Coactosin-like protein OS=Homo sapiens GN=COTL1 PE=1 SV=3	16049.08	0	0	0	1	2	1	3	0	2	0	1	1	1	1	0	0	0	1	2	1	2	0	2	0	1	1	1	1	0	0	0	1	2	1	2	0	2	0	1	1	1	1
449	sp|Q15080|NCF4_HUMAN	sp|Q15080|NCF4_HUMAN Neutrophil cytosol factor 4 OS=Homo sapiens GN=NCF4 PE=1 SV=2	39121.31	1	1	1	1	1	1	1	1	1	0	1	1	1	1	1	1	1	1	1	1	1	1	1	0	1	1	1	1	1	1	1	1	1	1	1	1	1	0	1	1	1	1
450	sp|P08174|DAF_HUMAN	sp|P08174|DAF_HUMAN Complement decay-accelerating factor OS=Homo sapiens GN=CD55 PE=1 SV=4	42399.96	1	0	2	1	1	1	1	0	0	1	1	1	2	1	1	0	1	1	1	1	1	0	0	1	1	1	1	1	1	0	1	1	1	1	1	0	0	1	1	1	1	1
451	sp|P14625|ENPL_HUMAN	sp|P14625|ENPL_HUMAN Endoplasmin OS=Homo sapiens GN=HSP90B1 PE=1 SV=1	92696.45	1	1	3	1	0	0	2	2	1	0	1	0	1	0	1	1	3	1	0	0	2	2	1	0	1	0	1	0	1	1	3	1	0	0	2	2	1	0	1	0	1	0
452	sp|Q9NRX4|PHP14_HUMAN	sp|Q9NRX4|PHP14_HUMAN 14 kDa phosphohistidine phosphatase OS=Homo sapiens GN=PHPT1 PE=1 SV=1	13994.76	1	0	1	1	1	1	1	1	1	1	1	1	2	0	1	0	1	1	1	1	1	1	1	1	1	1	1	0	1	0	1	1	1	1	1	1	1	1	1	1	1	0
453	sp|O95833|CLIC3_HUMAN	sp|O95833|CLIC3_HUMAN Chloride intracellular channel protein 3 OS=Homo sapiens GN=CLIC3 PE=1 SV=2	26916.82	1	0	0	2	0	2	0	1	0	1	1	2	1	2	1	0	0	1	0	1	0	1	0	1	1	1	1	2	1	0	0	1	0	1	0	1	0	1	1	1	1	2
454	sp|O75342|LX12B_HUMAN	sp|O75342|LX12B_HUMAN Arachidonate 12-lipoxygenase, 12R-type OS=Homo sapiens GN=ALOX12B PE=1 SV=1	81216.38	1	1	1	1	1	1	1	1	1	1	1	1	0	1	1	1	1	1	1	1	1	1	1	1	1	1	0	1	1	1	1	1	1	1	1	1	1	1	1	1	0	1
455	sp|P30050|RL12_HUMAN	sp|P30050|RL12_HUMAN 60S ribosomal protein L12 OS=Homo sapiens GN=RPL12 PE=1 SV=1	17978.6	1	1	1	1	0	1	1	1	1	1	1	1	1	1	1	1	1	1	0	1	1	1	1	1	1	1	1	1	1	1	1	1	0	1	1	1	1	1	1	1	1	1
456	sp|O43747|AP1G1_HUMAN	sp|O43747|AP1G1_HUMAN AP-1 complex subunit gamma-1 OS=Homo sapiens GN=AP1G1 PE=1 SV=5	92148.45	1	1	1	1	1	0	1	1	1	1	1	1	1	1	1	1	1	1	1	0	1	1	1	1	1	1	1	1	1	1	1	1	1	0	1	1	1	1	1	1	1	1
457	sp|P80188|NGAL_HUMAN	sp|P80188|NGAL_HUMAN Neutrophil gelatinase-associated lipocalin OS=Homo sapiens GN=LCN2 PE=1 SV=2	22744.78	0	1	1	1	1	1	1	1	1	1	1	2	0	1	0	1	1	1	1	1	1	1	1	1	1	1	0	1	0	1	1	1	1	1	1	1	1	1	1	1	0	1
458	sp|P11233|RALA_HUMAN	sp|P11233|RALA_HUMAN Ras-related protein Ral-A OS=Homo sapiens GN=RALA PE=1 SV=1	23723.04	1	1	1	1	1	0	1	1	1	1	1	1	1	1	1	1	1	1	1	0	1	1	1	1	1	1	1	1	1	1	1	1	1	0	1	1	1	1	1	1	1	1
459	sp|P30536|TSPO_HUMAN	sp|P30536|TSPO_HUMAN Translocator protein OS=Homo sapiens GN=TSPO PE=1 SV=3	18929.66	0	1	1	1	1	1	1	1	1	1	1	1	1	1	0	1	1	1	1	1	1	1	1	1	1	1	1	1	0	1	1	1	1	1	1	1	1	1	1	1	1	1
460	sp|Q00765|REEP5_HUMAN	sp|Q00765|REEP5_HUMAN Receptor expression-enhancing protein 5 OS=Homo sapiens GN=REEP5 PE=1 SV=3	21707.13	0	0	1	1	0	1	1	1	0	1	2	2	1	2	0	0	1	1	0	1	1	1	0	1	2	2	1	2	0	0	1	1	0	1	1	1	0	1	2	2	1	2
461	sp|P14550|AK1A1_HUMAN	AK1A1_HUMAN Alcohol dehydrogenase	36891.98	2	0	2	0	2	0	2	0	1	0	2	0	2	0	1	0	2	0	1	0	2	0	1	0	1	0	1	0	1	0	2	0	1	0	2	0	1	0	1	0	1	0
462	sp|P07099|HYEP_HUMAN	sp|P07099|HYEP_HUMAN Epoxide hydrolase 1 OS=Homo sapiens GN=EPHX1 PE=1 SV=1	53143.05	1	0	2	0	1	0	2	0	2	0	1	1	2	0	1	0	1	0	1	0	1	0	1	0	1	1	1	0	1	0	1	0	1	0	1	0	1	0	1	1	1	0
463	sp|P37802|TAGL2_HUMAN	sp|P37802|TAGL2_HUMAN Transgelin-2 OS=Homo sapiens GN=TAGLN2 PE=1 SV=3	22548.24	0	1	0	2	0	1	1	2	1	1	0	1	1	1	0	1	0	1	0	1	1	2	1	1	0	1	1	1	0	1	0	1	0	1	1	2	1	1	0	1	1	1
464	sp|P48147|PPCE_HUMAN	sp|P48147|PPCE_HUMAN Prolyl endopeptidase OS=Homo sapiens GN=PREP PE=1 SV=2	81560.37	1	1	1	1	1	0	0	1	1	1	1	1	1	1	1	1	1	1	1	0	0	1	1	1	1	1	1	1	1	1	1	1	1	0	0	1	1	1	1	1	1	1
465	sp|P51858|HDGF_HUMAN	sp|P51858|HDGF_HUMAN Hepatoma-derived growth factor OS=Homo sapiens GN=HDGF PE=1 SV=1	26885.91	0	1	0	1	0	0	0	3	1	3	0	2	0	1	0	1	0	1	0	0	0	2	1	2	0	1	0	1	0	1	0	1	0	0	0	2	1	2	0	1	0	1
466	sp|P62993|GRB2_HUMAN	sp|P62993|GRB2_HUMAN Growth factor receptor-bound protein 2 OS=Homo sapiens GN=GRB2 PE=1 SV=1	25304.48	1	1	1	0	1	0	1	1	0	0	3	0	3	0	1	1	1	0	1	0	1	1	0	0	3	0	3	0	1	1	1	0	1	0	1	1	0	0	3	0	3	0
467	sp|Q92688|AN32B_HUMAN	sp|Q92688|AN32B_HUMAN Acidic leucine-rich nuclear phosphoprotein 32 family member B OS=Homo sapiens GN=ANP32B PE=1 SV=1	28941.37	1	1	2	1	0	1	1	1	0	1	1	0	1	1	1	1	1	1	0	1	1	1	0	1	1	0	1	1	1	1	1	1	0	1	1	1	0	1	1	0	1	1
468	sp|P22695|QCR2_HUMAN	sp|P22695|QCR2_HUMAN Cytochrome b-c1 complex subunit 2, mitochondrial OS=Homo sapiens GN=UQCRC2 PE=1 SV=3	48583.95	1	0	0	1	0	3	0	1	1	1	0	2	1	1	1	0	0	1	0	2	0	1	1	1	0	2	1	1	1	0	0	1	0	2	0	1	1	1	0	2	1	1
469	sp|Q9UBW5|BIN2_HUMAN	sp|Q9UBW5|BIN2_HUMAN Bridging integrator 2 OS=Homo sapiens GN=BIN2 PE=1 SV=3	62007.88	0	1	1	1	1	0	1	1	1	1	1	1	1	1	0	1	1	1	1	0	1	1	1	1	1	1	1	1	0	1	1	1	1	0	1	1	1	1	1	1	1	1
470	sp|P49721|PSB2_HUMAN	sp|P49721|PSB2_HUMAN Proteasome subunit beta type-2 OS=Homo sapiens GN=PSMB2 PE=1 SV=1	22992.74	1	1	1	1	1	1	1	1	0	1	1	1	0	1	1	1	1	1	1	1	1	1	0	1	1	1	0	1	1	1	1	1	1	1	1	1	0	1	1	1	0	1
471	sp|O75832|PSD10_HUMAN	sp|O75832|PSD10_HUMAN 26S proteasome non-ATPase regulatory subunit 10 OS=Homo sapiens GN=PSMD10 PE=1 SV=1	24697.49	2	0	2	1	1	0	1	1	1	1	1	1	0	0	1	0	1	1	1	0	1	1	1	1	1	1	0	0	1	0	1	1	1	0	1	1	1	1	1	1	0	0
472	sp|Q9BT78|CSN4_HUMAN	sp|Q9BT78|CSN4_HUMAN COP9 signalosome complex subunit 4 OS=Homo sapiens GN=COPS4 PE=1 SV=1	46524.78	1	1	1	1	1	1	0	1	1	1	1	1	0	1	1	1	1	1	1	1	0	1	1	1	1	1	0	1	1	1	1	1	1	1	0	1	1	1	1	1	0	1
473	sp|P52790|HXK3_HUMAN	sp|P52790|HXK3_HUMAN Hexokinase-3 OS=Homo sapiens GN=HK3 PE=1 SV=2	100615.75	0	0	2	1	2	1	2	0	1	0	1	1	1	0	0	0	1	1	1	1	1	0	1	0	1	1	1	0	0	0	1	1	1	1	1	0	1	0	1	1	1	0
474	sp|Q9BS26|ERP44_HUMAN	sp|Q9BS26|ERP44_HUMAN Endoplasmic reticulum resident protein 44 OS=Homo sapiens GN=ERP44 PE=1 SV=1	47340.55	1	0	1	1	1	1	0	1	1	1	1	1	1	1	1	0	1	1	1	1	0	1	1	1	1	1	1	1	1	0	1	1	1	1	0	1	1	1	1	1	1	1
475	sp|P28062|PSB8_HUMAN	sp|P28062|PSB8_HUMAN Proteasome subunit beta type-8 OS=Homo sapiens GN=PSMB8 PE=1 SV=3	30676.7	2	1	1	1	1	2	1	1	0	0	1	0	1	0	2	1	1	1	1	2	1	1	0	0	1	0	1	0	2	1	1	1	1	2	1	1	0	0	1	0	1	0
476	sp|P05120|PAI2_HUMAN	sp|P05120|PAI2_HUMAN Plasminogen activator inhibitor 2 OS=Homo sapiens GN=SERPINB2 PE=1 SV=2	46851.25	1	1	1	1	1	0	1	1	1	1	1	1	0	1	1	1	1	1	1	0	1	1	1	1	1	1	0	1	1	1	1	1	1	0	1	1	1	1	1	1	0	1
477	sp|P51659|DHB4_HUMAN	sp|P51659|DHB4_HUMAN Peroxisomal multifunctional enzyme type 2 OS=Homo sapiens GN=HSD17B4 PE=1 SV=3	80092.48	1	0	1	0	2	0	2	0	2	0	2	0	2	0	1	0	1	0	2	0	2	0	2	0	2	0	2	0	1	0	1	0	2	0	2	0	2	0	2	0	2	0
478	sp|Q12906|ILF3_HUMAN	sp|Q12906|ILF3_HUMAN Interleukin enhancer-binding factor 3 OS=Homo sapiens GN=ILF3 PE=1 SV=3	95678.22	0	1	2	1	1	1	1	1	2	1	0	1	1	1	0	1	2	1	1	1	1	1	1	1	0	1	1	1	0	1	2	1	1	1	1	1	1	1	0	1	1	1
479	sp|Q13247|SRSF6_HUMAN	sp|Q13247|SRSF6_HUMAN Serine/arginine-rich splicing factor 6 OS=Homo sapiens GN=SRSF6 PE=1 SV=2	39677.44	1	1	1	1	1	1	1	1	1	1	1	1	1	1	1	1	1	1	1	1	1	1	1	1	1	1	1	1	1	1	1	1	1	1	1	1	1	1	1	1	1	1
480	sp|P41439|FOLR3_HUMAN	sp|P41439|FOLR3_HUMAN Folate receptor gamma OS=Homo sapiens GN=FOLR3 PE=1 SV=1	28532.23	0	3	0	3	0	1	0	2	0	3	0	3	0	3	0	1	0	2	0	1	0	1	0	2	0	2	0	2	0	1	0	2	0	1	0	1	0	2	0	2	0	2
481	sp|P22894|MMP8_HUMAN	sp|P22894|MMP8_HUMAN Neutrophil collagenase OS=Homo sapiens GN=MMP8 PE=1 SV=1	53549.56	1	0	1	0	1	1	1	1	1	1	1	1	1	1	1	0	1	0	1	1	1	1	1	1	1	1	1	1	1	0	1	0	1	1	1	1	1	1	1	1	1	1
482	sp|P53634|CATC_HUMAN	sp|P53634|CATC_HUMAN Dipeptidyl peptidase 1 OS=Homo sapiens GN=CTSC PE=1 SV=2	52618.59	1	1	1	1	0	1	1	1	1	1	0	1	1	1	1	1	1	1	0	1	1	1	1	1	0	1	1	1	1	1	1	1	0	1	1	1	1	1	0	1	1	1
483	sp|Q9UI42|CBPA4_HUMAN	sp|Q9UI42|CBPA4_HUMAN Carboxypeptidase A4 OS=Homo sapiens GN=CPA4 PE=1 SV=2	47549.78	0	1	0	0	0	2	1	2	0	1	0	3	0	2	0	1	0	0	0	2	1	2	0	1	0	3	0	2	0	1	0	0	0	2	1	2	0	1	0	3	0	2
484	sp|Q9UKR3|KLK13_HUMAN	sp|Q9UKR3|KLK13_HUMAN Kallikrein-13 OS=Homo sapiens GN=KLK13 PE=2 SV=1	31120.72	0	0	1	1	2	0	2	2	1	1	1	1	0	0	0	0	1	1	2	0	2	2	1	1	1	1	0	0	0	0	1	1	2	0	2	2	1	1	1	1	0	0
485	sp|P07954|FUMH_HUMAN	sp|P07954|FUMH_HUMAN Fumarate hydratase, mitochondrial OS=Homo sapiens GN=FH PE=1 SV=3	54773.23	1	1	2	1	2	1	0	0	1	1	0	0	2	0	1	1	2	1	2	1	0	0	1	1	0	0	2	0	1	1	2	1	2	1	0	0	1	1	0	0	2	0
486	sp|P78324|SHPS1_HUMAN	sp|P78324|SHPS1_HUMAN Tyrosine-protein phosphatase non-receptor type substrate 1 OS=Homo sapiens GN=SIRPA PE=1 SV=2	55446.02	1	1	1	1	1	1	1	1	1	1	0	1	0	1	1	1	1	1	1	1	1	1	1	1	0	1	0	1	1	1	1	1	1	1	1	1	1	1	0	1	0	1
487	hCoV-19/Italy/INMI1-isl/2020|EPI_ISL_410545|2020-01-29_M	hCoV-19/Italy/INMI1-isl/2020|EPI_ISL_410545|2020-01-29_M	25358.53	0	0	0	0	0	0	0	0	0	2	1	2	2	5	0	0	0	0	0	0	0	0	0	2	1	2	2	3	0	0	0	0	0	0	0	0	0	2	1	2	2	3
488	sp|P04843|RPN1_HUMAN	sp|P04843|RPN1_HUMAN Dolichyl-diphosphooligosaccharide--protein glycosyltransferase subunit 1 OS=Homo sapiens GN=RPN1 PE=1 SV=1	68640.85	1	1	1	1	0	0	1	1	0	1	1	1	1	1	1	1	1	1	0	0	1	1	0	1	1	1	1	1	1	1	1	1	0	0	1	1	0	1	1	1	1	1
489	sp|O95747|OXSR1_HUMAN	sp|O95747|OXSR1_HUMAN Serine/threonine-protein kinase OSR1 OS=Homo sapiens GN=OXSR1 PE=1 SV=1	58271.16	0	1	1	1	1	0	0	1	1	1	1	1	1	1	0	1	1	1	1	0	0	1	1	1	1	1	1	1	0	1	1	1	1	0	0	1	1	1	1	1	1	1
490	sp|Q8IUI8|CRLF3_HUMAN	sp|Q8IUI8|CRLF3_HUMAN Cytokine receptor-like factor 3 OS=Homo sapiens GN=CRLF3 PE=1 SV=2	50305.1	0	1	1	0	2	0	1	1	1	0	2	2	0	0	0	1	1	0	2	0	1	1	1	0	2	2	0	0	0	1	1	0	2	0	1	1	1	0	2	2	0	0
491	sp|O60763|USO1_HUMAN	sp|O60763|USO1_HUMAN General vesicular transport factor p115 OS=Homo sapiens GN=USO1 PE=1 SV=2	108740.4	1	1	1	0	1	1	0	0	1	1	2	1	1	0	1	1	1	0	1	1	0	0	1	1	1	1	1	0	1	1	1	0	1	1	0	0	1	1	1	1	1	0
492	sp|P36955|PEDF_HUMAN	sp|P36955|PEDF_HUMAN Pigment epithelium-derived factor OS=Homo sapiens GN=SERPINF1 PE=1 SV=4	46454.37	1	0	1	1	1	0	1	1	1	1	1	0	1	1	1	0	1	1	1	0	1	1	1	1	1	0	1	1	1	0	1	1	1	0	1	1	1	1	1	0	1	1
493	sp|Q9UGI8|TES_HUMAN	sp|Q9UGI8|TES_HUMAN Testin OS=Homo sapiens GN=TES PE=1 SV=1	49788.58	1	1	1	1	0	1	0	1	0	0	1	2	0	2	1	1	1	1	0	1	0	1	0	0	1	2	0	2	1	1	1	1	0	1	0	1	0	0	1	2	0	2
494	sp|P61956|SUMO2_HUMAN	sp|P61956|SUMO2_HUMAN Small ubiquitin-related modifier 2 OS=Homo sapiens GN=SUMO2 PE=1 SV=3	10921.38	1	0	1	0	1	0	1	1	1	1	1	1	1	1	1	0	1	0	1	0	1	1	1	1	1	1	1	1	1	0	1	0	1	0	1	1	1	1	1	1	1	1
495	sp|Q92876|KLK6_HUMAN	sp|Q92876|KLK6_HUMAN Kallikrein-6 OS=Homo sapiens GN=KLK6 PE=1 SV=1	27522.61	0	1	1	0	1	0	1	2	1	1	1	1	1	0	0	1	1	0	1	0	1	2	1	1	1	1	1	0	0	1	1	0	1	0	1	2	1	1	1	1	1	0
496	sp|P01715|LV301_HUMAN	sp|P01715|LV301_HUMAN Immunoglobulin lambda variable 3-1 OS=Homo sapiens GN=IGLV3-1 PE=1 SV=2	12515.89	0	1	1	0	1	0	1	0	2	1	0	1	2	1	0	1	1	0	1	0	1	0	1	1	0	1	1	1	0	1	1	0	1	0	1	0	1	1	0	1	1	1
497	sp|P29966|MARCS_HUMAN	sp|P29966|MARCS_HUMAN Myristoylated alanine-rich C-kinase substrate OS=Homo sapiens GN=MARCKS PE=1 SV=4	31706.93	1	1	1	1	1	0	1	1	1	1	0	1	0	1	1	1	1	1	1	0	1	1	1	1	0	1	0	1	1	1	1	1	1	0	1	1	1	1	0	1	0	1
498	sp|P67936|TPM4_HUMAN	sp|P67936|TPM4_HUMAN Tropomyosin alpha-4 chain OS=Homo sapiens GN=TPM4 PE=1 SV=3	28618.53	0	1	0	1	1	1	1	0	0	1	0	2	2	1	0	1	0	1	1	1	1	0	0	1	0	2	2	1	0	2	0	2	2	2	2	0	0	2	0	3	2	2
499	sp|P36952|SPB5_HUMAN	sp|P36952|SPB5_HUMAN Serpin B5 OS=Homo sapiens GN=SERPINB5 PE=1 SV=2	42529.57	0	1	1	2	1	1	0	1	0	1	0	1	1	1	0	1	1	1	1	1	0	1	0	1	0	1	1	1	0	1	1	1	1	1	0	1	0	1	0	1	1	1
500	sp|Q96FX8|PERP_HUMAN	sp|Q96FX8|PERP_HUMAN p53 apoptosis effector related to PMP-22 OS=Homo sapiens GN=PERP PE=2 SV=1	21998.96	0	2	0	2	0	1	0	1	0	2	0	1	0	2	0	1	0	1	0	1	0	1	0	1	0	1	0	1	0	1	0	1	0	1	0	1	0	1	0	1	0	1
501	sp|P14555|PA2GA_HUMAN	sp|P14555|PA2GA_HUMAN Phospholipase A2, membrane associated OS=Homo sapiens GN=PLA2G2A PE=1 SV=2	16870.09	0	3	0	2	0	3	0	1	0	1	0	1	0	0	0	2	0	2	0	2	0	1	0	1	0	1	0	0	0	2	0	2	0	2	0	1	0	1	0	1	0	0
502	sp|P43353|AL3B1_HUMAN	sp|P43353|AL3B1_HUMAN Aldehyde dehydrogenase family 3 member B1 OS=Homo sapiens GN=ALDH3B1 PE=1 SV=1	52433.8	1	0	0	1	0	1	1	1	1	1	0	2	1	1	1	0	0	1	0	1	1	1	1	1	0	2	1	1	1	0	0	1	0	1	1	1	1	1	0	2	1	1
503	sp|P05186|PPBT_HUMAN	sp|P05186|PPBT_HUMAN Alkaline phosphatase, tissue-nonspecific isozyme OS=Homo sapiens GN=ALPL PE=1 SV=4	57610.75	1	1	1	1	0	1	0	1	1	1	1	0	2	0	1	1	1	1	0	1	0	1	1	1	1	0	2	0	1	1	1	1	0	1	0	1	1	1	1	0	2	0
504	sp|P08708|RS17_HUMAN	sp|P08708|RS17_HUMAN 40S ribosomal protein S17 OS=Homo sapiens GN=RPS17 PE=1 SV=2	15597.41	0	2	0	1	0	2	0	1	0	1	0	3	0	1	0	2	0	1	0	2	0	1	0	1	0	2	0	1	0	2	0	1	0	2	0	1	0	1	0	2	0	1
505	sp|P04062|GLCM_HUMAN	sp|P04062|GLCM_HUMAN Glucosylceramidase OS=Homo sapiens GN=GBA PE=1 SV=3	60134.42	0	1	1	0	0	1	1	1	2	1	2	0	1	0	0	1	1	0	0	1	1	1	1	1	1	0	1	0	0	1	1	0	0	1	1	1	1	1	1	0	1	0
506	sp|P00403|COX2_HUMAN	sp|P00403|COX2_HUMAN Cytochrome c oxidase subunit 2 OS=Homo sapiens GN=MT-CO2 PE=1 SV=1	25719.28	0	2	0	2	0	1	0	1	0	1	1	1	1	1	0	1	0	1	0	1	0	1	0	1	1	1	1	1	0	1	0	1	0	1	0	1	0	1	1	1	1	1
507	sp|P60660|MYL6_HUMAN	sp|P60660|MYL6_HUMAN Myosin light polypeptide 6 OS=Homo sapiens GN=MYL6 PE=1 SV=2	17090.2	0	0	0	1	1	2	0	2	0	1	1	0	1	2	0	0	0	1	1	1	0	1	0	1	1	0	1	1	0	0	0	1	1	1	0	1	0	1	1	0	1	1
508	sp|Q14508|WFDC2_HUMAN	sp|Q14508|WFDC2_HUMAN WAP four-disulfide core domain protein 2 OS=Homo sapiens GN=WFDC2 PE=1 SV=2	13953.24	2	0	1	0	2	0	1	0	1	0	2	0	2	0	1	0	1	0	1	0	1	0	1	0	1	0	1	0	1	0	1	0	1	0	1	0	1	0	1	0	1	0
509	sp|Q7Z4W1|DCXR_HUMAN	sp|Q7Z4W1|DCXR_HUMAN L-xylulose reductase OS=Homo sapiens GN=DCXR PE=1 SV=2	26181.66	1	1	1	1	1	1	1	1	0	1	1	0	0	1	1	1	1	1	1	1	1	1	0	1	1	0	0	1	1	1	1	1	1	1	1	1	0	1	1	0	0	1
510	sp|O75015|FCG3B_HUMAN	sp|O75015|FCG3B_HUMAN Low affinity immunoglobulin gamma Fc region receptor III-B OS=Homo sapiens GN=FCGR3B PE=1 SV=2	26484.31	1	0	1	1	1	1	1	1	0	1	1	0	1	1	1	0	1	1	1	1	1	1	0	1	1	0	1	1	1	0	1	1	1	1	1	1	0	1	1	0	1	1
511	sp|P42357|HUTH_HUMAN	sp|P42357|HUTH_HUMAN Histidine ammonia-lyase OS=Homo sapiens GN=HAL PE=1 SV=1	73336.08	0	1	1	1	1	1	0	1	0	1	1	1	1	1	0	1	1	1	1	1	0	1	0	1	1	1	1	1	0	1	1	1	1	1	0	1	0	1	1	1	1	1
512	sp|P60900|PSA6_HUMAN	sp|P60900|PSA6_HUMAN Proteasome subunit alpha type-6 OS=Homo sapiens GN=PSMA6 PE=1 SV=1	27837.98	1	0	1	0	1	0	1	1	1	1	1	1	1	1	1	0	1	0	1	0	1	1	1	1	1	1	1	1	1	0	1	0	1	0	1	1	1	1	1	1	1	1
513	sp|O94979|SC31A_HUMAN	sp|O94979|SC31A_HUMAN Protein transport protein Sec31A OS=Homo sapiens GN=SEC31A PE=1 SV=3	133900.37	1	0	3	0	2	0	0	0	2	0	1	0	2	0	1	0	3	0	2	0	0	0	2	0	1	0	2	0	1	0	3	0	2	0	0	0	2	0	1	0	2	0
514	sp|P03950|ANGI_HUMAN	sp|P03950|ANGI_HUMAN Angiogenin OS=Homo sapiens GN=ANG PE=1 SV=1	16881.57	1	1	1	1	1	1	0	1	1	1	0	1	0	1	1	1	1	1	1	1	0	1	1	1	0	1	0	1	1	1	1	1	1	1	0	1	1	1	0	1	0	1
515	sp|O75396|SC22B_HUMAN	sp|O75396|SC22B_HUMAN Vesicle-trafficking protein SEC22b OS=Homo sapiens GN=SEC22B PE=1 SV=4	24805.62	0	0	0	0	1	0	1	1	1	1	1	1	1	2	0	0	0	0	1	0	1	1	1	1	1	1	1	2	0	0	0	0	1	0	1	1	1	1	1	1	1	2
516	sp|P15880|RS2_HUMAN	sp|P15880|RS2_HUMAN 40S ribosomal protein S2 OS=Homo sapiens GN=RPS2 PE=1 SV=2	31589.7	1	0	0	0	1	1	1	0	1	1	1	1	0	2	1	0	0	0	1	1	1	0	1	1	1	1	0	2	1	0	0	0	1	1	1	0	1	1	1	1	0	2
517	sp|Q16531|DDB1_HUMAN	sp|Q16531|DDB1_HUMAN DNA damage-binding protein 1 OS=Homo sapiens GN=DDB1 PE=1 SV=1	128141.79	0	0	0	1	1	1	0	1	1	1	1	1	1	1	0	0	0	1	1	1	0	1	1	1	1	1	1	1	0	0	0	1	1	1	0	1	1	1	1	1	1	1
518	sp|O00584|RNT2_HUMAN	sp|O00584|RNT2_HUMAN Ribonuclease T2 OS=Homo sapiens GN=RNASET2 PE=1 SV=2	30089.06	0	2	1	0	1	1	1	0	1	0	1	1	1	0	0	1	1	0	1	1	1	0	1	0	1	1	1	0	0	1	1	0	1	1	1	0	1	0	1	1	1	0
519	sp|P00568|KAD1_HUMAN	sp|P00568|KAD1_HUMAN Adenylate kinase isoenzyme 1 OS=Homo sapiens GN=AK1 PE=1 SV=3	21735.35	2	1	1	1	1	1	0	1	1	0	0	0	0	1	2	1	1	1	1	1	0	1	1	0	0	0	0	1	2	1	1	1	1	1	0	1	1	0	0	0	0	1
520	sp|P60842|IF4A1_HUMAN	sp|P60842|IF4A1_HUMAN Eukaryotic initiation factor 4A-I OS=Homo sapiens GN=EIF4A1 PE=1 SV=1	46352.64	1	1	1	1	1	2	0	1	0	1	1	1	0	1	1	1	1	1	1	2	0	1	0	1	1	1	0	1	1	1	1	1	1	2	0	1	0	1	1	1	0	1
521	sp|P49755|TMEDA_HUMAN	sp|P49755|TMEDA_HUMAN Transmembrane emp24 domain-containing protein 10 OS=Homo sapiens GN=TMED10 PE=1 SV=2	25131.09	0	0	1	0	1	1	1	1	1	1	0	1	1	1	0	0	1	0	1	1	1	1	1	1	0	1	1	1	0	0	1	0	1	1	1	1	1	1	0	1	1	1
522	sp|P56192|SYMC_HUMAN	sp|P56192|SYMC_HUMAN Methionine--tRNA ligase, cytoplasmic OS=Homo sapiens GN=MARS PE=1 SV=2	102249.36	1	0	2	1	1	0	2	0	1	0	1	0	1	0	1	0	2	1	1	0	2	0	1	0	1	0	1	0	1	0	2	1	1	0	2	0	1	0	1	0	1	0
523	sp|P07602|SAP_HUMAN	sp|P07602|SAP_HUMAN Prosaposin OS=Homo sapiens GN=PSAP PE=1 SV=2	59898.54	0	0	2	0	1	0	2	2	0	1	1	0	1	0	0	0	1	0	1	0	1	2	0	1	1	0	1	0	0	0	1	0	1	0	1	2	0	1	1	0	1	0
524	sp|Q15366|PCBP2_HUMAN	sp|Q15366|PCBP2_HUMAN Poly(rC)-binding protein 2 OS=Homo sapiens GN=PCBP2 PE=1 SV=1	38954.74	1	0	1	0	1	0	0	1	1	1	1	1	1	1	1	0	1	0	1	0	0	1	1	1	1	1	1	1	1	0	1	0	1	0	0	1	1	1	1	1	1	1
525	sp|Q02383|SEMG2_HUMAN	sp|Q02383|SEMG2_HUMAN Semenogelin-2 OS=Homo sapiens GN=SEMG2 PE=1 SV=1	65519.46	0	0	1	2	0	1	0	2	0	0	1	2	0	1	0	0	1	2	0	1	0	2	0	0	1	2	0	1	0	0	1	2	0	1	0	2	0	0	1	2	0	1
526	sp|Q9Y2J8|PADI2_HUMAN	sp|Q9Y2J8|PADI2_HUMAN Protein-arginine deiminase type-2 OS=Homo sapiens GN=PADI2 PE=1 SV=2	76256.62	1	1	0	0	1	1	0	1	1	1	1	0	1	1	1	1	0	0	1	1	0	1	1	1	1	0	1	1	1	1	0	0	1	1	0	1	1	1	1	0	1	1
527	sp|P27694|RFA1_HUMAN	sp|P27694|RFA1_HUMAN Replication protein A 70 kDa DNA-binding subunit OS=Homo sapiens GN=RPA1 PE=1 SV=2	68722.51	1	0	1	1	0	0	1	1	1	0	1	0	2	1	1	0	1	1	0	0	1	1	1	0	1	0	1	1	1	0	1	1	0	0	1	1	1	0	1	0	1	1
528	sp|P62333|PRS10_HUMAN	sp|P62333|PRS10_HUMAN 26S protease regulatory subunit 10B OS=Homo sapiens GN=PSMC6 PE=1 SV=1	44430.21	1	1	1	1	0	1	1	0	1	1	1	1	0	0	1	1	1	1	0	1	1	0	1	1	1	1	0	0	1	1	1	1	0	1	1	0	1	1	1	1	0	0
529	sp|Q15437|SC23B_HUMAN	sp|Q15437|SC23B_HUMAN Protein transport protein Sec23B OS=Homo sapiens GN=SEC23B PE=1 SV=2	87392.88	1	2	0	0	0	1	0	2	1	0	2	0	1	0	1	1	0	0	0	1	0	1	1	0	1	0	1	0	1	1	0	0	0	1	0	1	1	0	1	0	1	0
530	sp|P38606|VATA_HUMAN	sp|P38606|VATA_HUMAN V-type proton ATPase catalytic subunit A OS=Homo sapiens GN=ATP6V1A PE=1 SV=2	68659.64	0	1	0	0	0	0	2	1	2	1	1	0	1	1	0	1	0	0	0	0	2	1	2	1	1	0	1	1	0	1	0	0	0	0	2	1	2	1	1	0	1	1
531	sp|P61106|RAB14_HUMAN	sp|P61106|RAB14_HUMAN Ras-related protein Rab-14 OS=Homo sapiens GN=RAB14 PE=1 SV=4	24110.01	1	1	1	1	1	1	1	0	1	1	0	1	0	0	1	1	1	1	1	1	1	0	1	1	0	1	0	0	1	1	1	1	1	1	1	0	1	1	0	1	0	0
532	sp|Q9NZR1|TMOD2_HUMAN	sp|Q9NZR1|TMOD2_HUMAN Tropomodulin-2 OS=Homo sapiens GN=TMOD2 PE=1 SV=1	39570.68	1	1	1	1	1	0	1	1	1	0	1	0	1	1	1	1	1	1	1	0	1	1	1	0	1	0	1	1	1	1	1	1	1	0	1	1	1	0	1	0	1	1
533	sp|P21281|VATB2_HUMAN	sp|P21281|VATB2_HUMAN V-type proton ATPase subunit B, brain isoform OS=Homo sapiens GN=ATP6V1B2 PE=1 SV=3	56807.0	0	1	0	1	0	1	0	2	0	2	0	2	0	1	0	1	0	1	0	1	0	1	0	1	0	1	0	1	0	1	0	1	0	1	0	1	0	1	0	1	0	1
534	sp|Q14254|FLOT2_HUMAN	sp|Q14254|FLOT2_HUMAN Flotillin-2 OS=Homo sapiens GN=FLOT2 PE=1 SV=2	47433.81	0	0	0	1	0	2	0	2	0	2	0	2	0	1	0	0	0	1	0	2	0	2	0	2	0	2	0	1	0	0	0	1	0	2	0	2	0	2	0	2	0	1
535	sp|Q6UXB2|CXL17_HUMAN	sp|Q6UXB2|CXL17_HUMAN C-X-C motif chemokine 17 OS=Homo sapiens GN=CXCL17 PE=1 SV=1	14152.37	0	0	0	1	0	2	0	2	0	1	0	2	0	2	0	0	0	1	0	1	0	2	0	1	0	1	0	2	0	0	0	1	0	1	0	2	0	1	0	1	0	2
536	sp|Q7Z7M9|GALT5_HUMAN	sp|Q7Z7M9|GALT5_HUMAN Polypeptide N-acetylgalactosaminyltransferase 5 OS=Homo sapiens GN=GALNT5 PE=1 SV=1	107054.77	1	0	1	0	1	0	1	1	1	1	1	1	1	0	1	0	1	0	1	0	1	1	1	1	1	1	1	0	1	0	1	0	1	0	1	1	1	1	1	1	1	0
537	sp|Q9BZG9|LYNX1_HUMAN	sp|Q9BZG9|LYNX1_HUMAN Ly-6/neurotoxin-like protein 1 OS=Homo sapiens GN=LYNX1 PE=1 SV=3	14871.8	1	1	1	1	1	0	1	0	1	0	1	0	1	1	1	1	1	1	1	0	1	0	1	0	1	0	1	1	1	1	1	1	1	0	1	0	1	0	1	0	1	1
538	sp|O00232|PSD12_HUMAN	sp|O00232|PSD12_HUMAN 26S proteasome non-ATPase regulatory subunit 12 OS=Homo sapiens GN=PSMD12 PE=1 SV=3	53269.72	0	1	1	0	0	0	1	1	1	0	1	1	2	1	0	1	1	0	0	0	1	1	1	0	1	1	2	1	0	1	1	0	0	0	1	1	1	0	1	1	2	1
539	sp|Q06210|GFPT1_HUMAN	GFPT1_HUMAN Glutamine--fructose-6-phosphate aminotransferase	79554.62	0	0	1	0	2	0	2	0	2	0	1	0	2	0	0	0	1	0	1	0	1	0	1	0	1	0	1	0	0	0	1	0	1	0	1	0	1	0	1	0	1	0
540	sp|P32969|RL9_HUMAN	sp|P32969|RL9_HUMAN 60S ribosomal protein L9 OS=Homo sapiens GN=RPL9 PE=1 SV=1	21963.84	0	1	0	1	0	1	1	1	0	2	1	1	0	1	0	1	0	1	0	1	1	1	0	1	1	1	0	1	0	1	0	1	0	1	1	1	0	1	1	1	0	1
541	sp|Q16698|DECR_HUMAN	sp|Q16698|DECR_HUMAN 2,4-dienoyl-CoA reductase, mitochondrial OS=Homo sapiens GN=DECR1 PE=1 SV=1	36329.91	1	0	1	1	1	0	1	0	1	1	1	1	1	0	1	0	1	1	1	0	1	0	1	1	1	1	1	0	1	0	1	1	1	0	1	0	1	1	1	1	1	0
542	sp|P49748|ACADV_HUMAN	sp|P49748|ACADV_HUMAN Very long-chain specific acyl-CoA dehydrogenase, mitochondrial OS=Homo sapiens GN=ACADVL PE=1 SV=1	70744.58	1	0	1	0	2	1	1	0	1	1	0	0	1	1	1	0	1	0	2	1	1	0	1	1	0	0	1	1	1	0	1	0	2	1	1	0	1	1	0	0	1	1
543	sp|Q86VP6|CAND1_HUMAN	sp|Q86VP6|CAND1_HUMAN Cullin-associated NEDD8-dissociated protein 1 OS=Homo sapiens GN=CAND1 PE=1 SV=2	137999.3	0	1	1	1	1	1	1	0	0	1	1	2	0	0	0	1	1	1	1	1	1	0	0	1	1	2	0	0	0	1	1	1	1	1	1	0	0	1	1	2	0	0
544	sp|P50995|ANX11_HUMAN	sp|P50995|ANX11_HUMAN Annexin A11 OS=Homo sapiens GN=ANXA11 PE=1 SV=1	54697.2	0	0	0	0	1	0	1	1	1	0	1	1	1	1	0	0	0	0	1	0	1	1	1	0	1	1	1	1	0	0	0	0	1	0	1	1	1	0	1	1	1	1
545	sp|P21397|AOFA_HUMAN	AOFA_HUMAN Amine oxidase	60156.74	2	0	2	0	1	0	0	0	1	0	1	0	2	0	2	0	2	0	1	0	0	0	1	0	1	0	2	0	2	0	2	0	1	0	0	0	1	0	1	0	2	0
546	sp|P17612|KAPCA_HUMAN	sp|P17612|KAPCA_HUMAN cAMP-dependent protein kinase catalytic subunit alpha OS=Homo sapiens GN=PRKACA PE=1 SV=2	40678.04	2	0	1	1	1	0	1	0	1	0	1	1	1	1	2	0	1	1	1	0	1	0	1	0	1	1	1	1	2	0	1	1	1	0	1	0	1	0	1	1	1	1
547	sp|O75390|CISY_HUMAN	sp|O75390|CISY_HUMAN Citrate synthase, mitochondrial OS=Homo sapiens GN=CS PE=1 SV=2	51907.6	0	0	1	0	1	1	1	1	0	1	1	1	1	0	0	0	1	0	1	1	1	1	0	1	1	1	1	0	0	0	1	0	1	1	1	1	0	1	1	1	1	0
548	sp|P27695|APEX1_HUMAN	sp|P27695|APEX1_HUMAN DNA-(apurinic or apyrimidinic site) lyase OS=Homo sapiens GN=APEX1 PE=1 SV=2	35931.32	0	1	0	1	0	1	0	2	0	1	1	1	0	1	0	1	0	1	0	1	0	2	0	1	1	1	0	1	0	1	0	1	0	1	0	2	0	1	1	1	0	1
549	sp|P05155|IC1_HUMAN	sp|P05155|IC1_HUMAN Plasma protease C1 inhibitor OS=Homo sapiens GN=SERPING1 PE=1 SV=2	55347.48	2	0	0	0	1	0	1	0	2	0	2	0	1	0	1	0	0	0	1	0	1	0	1	0	1	0	1	0	1	0	0	0	1	0	1	0	1	0	1	0	1	0
550	sp|P09622|DLDH_HUMAN	sp|P09622|DLDH_HUMAN Dihydrolipoyl dehydrogenase, mitochondrial OS=Homo sapiens GN=DLD PE=1 SV=2	54713.19	1	0	1	0	1	0	1	0	1	0	2	0	2	0	1	0	1	0	1	0	1	0	1	0	1	0	1	0	1	0	1	0	1	0	1	0	1	0	1	0	1	0
551	sp|P62841|RS15_HUMAN	sp|P62841|RS15_HUMAN 40S ribosomal protein S15 OS=Homo sapiens GN=RPS15 PE=1 SV=2	17029.17	1	0	1	1	0	1	1	0	0	1	1	1	0	1	1	0	1	1	0	1	1	0	0	1	1	1	0	1	1	0	1	1	0	1	1	0	0	1	1	1	0	1
552	sp|P14317|HCLS1_HUMAN	sp|P14317|HCLS1_HUMAN Hematopoietic lineage cell-specific protein OS=Homo sapiens GN=HCLS1 PE=1 SV=3	54095.02	0	1	1	1	0	1	1	1	1	0	0	1	0	1	0	1	1	1	0	1	1	1	1	0	0	1	0	1	0	1	1	1	0	1	1	1	1	0	0	1	0	1
553	sp|P13671|CO6_HUMAN	sp|P13671|CO6_HUMAN Complement component C6 OS=Homo sapiens GN=C6 PE=1 SV=3	108367.38	0	0	3	0	1	0	1	0	2	0	2	0	0	0	0	0	3	0	1	0	1	0	2	0	2	0	0	0	0	0	3	0	1	0	1	0	2	0	2	0	0	0
554	sp|Q13277|STX3_HUMAN	sp|Q13277|STX3_HUMAN Syntaxin-3 OS=Homo sapiens GN=STX3 PE=1 SV=3	33134.42	1	1	0	1	1	1	1	1	0	0	0	1	0	1	1	1	0	1	1	1	1	1	0	0	0	1	0	1	1	1	0	1	1	1	1	1	0	0	0	1	0	1
555	sp|P20340|RAB6A_HUMAN	sp|P20340|RAB6A_HUMAN Ras-related protein Rab-6A OS=Homo sapiens GN=RAB6A PE=1 SV=3	23691.96	1	0	0	0	0	0	1	1	1	1	1	1	1	1	1	0	0	0	0	0	1	1	1	1	1	1	1	1	1	0	0	0	0	0	1	1	1	1	1	1	1	1
556	sp|Q15942|ZYX_HUMAN	sp|Q15942|ZYX_HUMAN Zyxin OS=Homo sapiens GN=ZYX PE=1 SV=1	62435.62	0	1	1	0	0	2	0	1	0	0	1	0	0	3	0	1	1	0	0	1	0	1	0	0	1	0	0	2	0	1	1	0	0	1	0	1	0	0	1	0	0	2
557	sp|P42677|RS27_HUMAN	sp|P42677|RS27_HUMAN 40S ribosomal protein S27 OS=Homo sapiens GN=RPS27 PE=1 SV=3	9796.96	0	1	1	2	0	0	0	1	0	2	0	2	0	0	0	1	1	1	0	0	0	1	0	1	0	1	0	0	0	1	1	1	0	0	0	1	0	1	0	1	0	0
558	sp|Q96HN2|SAHH3_HUMAN	sp|Q96HN2|SAHH3_HUMAN Adenosylhomocysteinase 3 OS=Homo sapiens GN=AHCYL2 PE=1 SV=1	67704.87	0	0	0	0	1	0	1	1	1	1	1	1	1	1	0	0	0	0	1	0	1	1	1	1	1	1	1	1	0	0	0	0	1	0	1	1	1	1	1	1	1	1
559	sp|Q99623|PHB2_HUMAN	sp|Q99623|PHB2_HUMAN Prohibitin-2 OS=Homo sapiens GN=PHB2 PE=1 SV=2	33275.92	1	1	1	1	1	1	1	0	0	0	1	0	1	0	1	1	1	1	1	1	1	0	0	0	1	0	1	0	1	1	1	1	1	1	1	0	0	0	1	0	1	0
560	sp|Q969H8|MYDGF_HUMAN	sp|Q969H8|MYDGF_HUMAN Myeloid-derived growth factor OS=Homo sapiens GN=MYDGF PE=1 SV=1	18897.36	1	1	1	1	1	1	0	1	0	0	0	0	1	1	1	1	1	1	1	1	0	1	0	0	0	0	1	1	1	1	1	1	1	1	0	1	0	0	0	0	1	1
561	sp|Q02817|MUC2_HUMAN	sp|Q02817|MUC2_HUMAN Mucin-2 OS=Homo sapiens GN=MUC2 PE=1 SV=2	552217.97	0	2	0	1	0	1	0	1	0	1	0	1	0	2	0	2	0	1	0	1	0	1	0	1	0	1	0	2	0	2	0	1	0	1	0	1	0	1	0	1	0	2
562	sp|P54578|UBP14_HUMAN	sp|P54578|UBP14_HUMAN Ubiquitin carboxyl-terminal hydrolase 14 OS=Homo sapiens GN=USP14 PE=1 SV=3	56489.2	1	1	1	0	1	1	1	0	1	1	0	1	0	0	1	1	1	0	1	1	1	0	1	1	0	1	0	0	1	1	1	0	1	1	1	0	1	1	0	1	0	0
563	sp|P61160|ARP2_HUMAN	sp|P61160|ARP2_HUMAN Actin-related protein 2 OS=Homo sapiens GN=ACTR2 PE=1 SV=1	45017.34	1	1	1	1	0	1	0	1	0	0	0	2	1	0	1	1	1	1	0	1	0	1	0	0	0	2	1	0	1	1	1	1	0	1	0	1	0	0	0	2	1	0
564	sp|O94832|MYO1D_HUMAN	sp|O94832|MYO1D_HUMAN Unconventional myosin-Id OS=Homo sapiens GN=MYO1D PE=1 SV=2	116926.85	1	0	1	1	1	0	0	1	1	1	1	1	0	0	1	0	1	1	1	0	0	1	1	1	1	1	0	0	1	0	1	1	1	0	0	1	1	1	1	1	0	0
565	sp|P62888|RL30_HUMAN	sp|P62888|RL30_HUMAN 60S ribosomal protein L30 OS=Homo sapiens GN=RPL30 PE=1 SV=2	12946.81	0	0	0	1	0	2	1	1	0	1	1	1	1	0	0	0	0	1	0	1	1	1	0	1	1	1	1	0	0	0	0	1	0	1	1	1	0	1	1	1	1	0
566	sp|P35998|PRS7_HUMAN	sp|P35998|PRS7_HUMAN 26S protease regulatory subunit 7 OS=Homo sapiens GN=PSMC2 PE=1 SV=3	49002.27	0	0	0	0	1	0	2	1	2	0	1	0	1	1	0	0	0	0	1	0	1	1	1	0	1	0	1	1	0	0	0	0	1	0	1	1	1	0	1	0	1	1
567	sp|Q08209|PP2BA_HUMAN	sp|Q08209|PP2BA_HUMAN Serine/threonine-protein phosphatase 2B catalytic subunit alpha isoform OS=Homo sapiens GN=PPP3CA PE=1 SV=1	59334.56	1	1	1	1	0	1	0	0	1	1	1	0	1	0	1	1	1	1	0	1	0	0	1	1	1	0	1	0	1	1	1	1	0	1	0	0	1	1	1	0	1	0
568	sp|Q6UX06|OLFM4_HUMAN	sp|Q6UX06|OLFM4_HUMAN Olfactomedin-4 OS=Homo sapiens GN=OLFM4 PE=1 SV=1	57528.9	0	0	1	0	1	0	1	1	1	1	1	2	0	0	0	0	1	0	1	0	1	1	1	1	1	2	0	0	0	0	1	0	1	0	1	1	1	1	1	2	0	0
569	sp|Q00325|MPCP_HUMAN	sp|Q00325|MPCP_HUMAN Phosphate carrier protein, mitochondrial OS=Homo sapiens GN=SLC25A3 PE=1 SV=2	40524.91	1	0	1	0	0	0	1	1	2	1	1	0	1	0	1	0	1	0	0	0	1	1	1	1	1	0	1	0	1	0	1	0	0	0	1	1	1	1	1	0	1	0
570	sp|P42224|STAT1_HUMAN	sp|P42224|STAT1_HUMAN Signal transducer and activator of transcription 1-alpha/beta OS=Homo sapiens GN=STAT1 PE=1 SV=2	87849.73	1	0	1	0	1	1	1	0	1	1	1	0	1	0	1	0	1	0	1	1	1	0	1	1	1	0	1	0	1	0	1	0	1	1	1	0	1	1	1	0	1	0
571	sp|P30520|PURA2_HUMAN	sp|P30520|PURA2_HUMAN Adenylosuccinate synthetase isozyme 2 OS=Homo sapiens GN=ADSS PE=1 SV=3	50464.92	1	0	1	0	1	0	1	1	1	0	1	0	1	1	1	0	1	0	1	0	1	1	1	0	1	0	1	1	1	0	1	0	1	0	1	1	1	0	1	0	1	1
572	sp|Q70J99|UN13D_HUMAN	sp|Q70J99|UN13D_HUMAN Protein unc-13 homolog D OS=Homo sapiens GN=UNC13D PE=1 SV=1	124288.07	0	1	0	1	0	1	0	1	0	1	1	2	0	1	0	1	0	1	0	1	0	1	0	1	1	2	0	1	0	1	0	1	0	1	0	1	0	1	1	2	0	1
573	sp|Q13409|DC1I2_HUMAN	sp|Q13409|DC1I2_HUMAN Cytoplasmic dynein 1 intermediate chain 2 OS=Homo sapiens GN=DYNC1I2 PE=1 SV=3	71811.26	1	0	0	1	1	0	2	1	1	0	0	1	0	1	1	0	0	1	1	0	2	1	1	0	0	1	0	1	1	0	0	1	1	0	2	1	1	0	0	1	0	1
574	sp|Q9Y6N5|SQRD_HUMAN	sp|Q9Y6N5|SQRD_HUMAN Sulfide:quinone oxidoreductase, mitochondrial OS=Homo sapiens GN=SQRDL PE=1 SV=1	50213.96	0	1	0	1	0	2	0	1	0	0	1	1	1	1	0	1	0	1	0	2	0	1	0	0	1	1	1	1	0	1	0	1	0	2	0	1	0	0	1	1	1	1
575	sp|P08754|GNAI3_HUMAN	sp|P08754|GNAI3_HUMAN Guanine nucleotide-binding protein G(k) subunit alpha OS=Homo sapiens GN=GNAI3 PE=1 SV=3	41076.48	1	1	0	1	0	1	1	0	1	0	1	1	0	1	1	1	0	1	0	1	1	0	1	0	1	1	0	1	1	1	0	1	0	1	1	0	1	0	1	1	0	1
576	sp|Q02818|NUCB1_HUMAN	sp|Q02818|NUCB1_HUMAN Nucleobindin-1 OS=Homo sapiens GN=NUCB1 PE=1 SV=4	53846.33	0	0	1	1	1	1	1	0	0	1	1	1	1	0	0	0	1	1	1	1	1	0	0	1	1	1	1	0	0	0	1	1	1	1	1	0	0	1	1	1	1	0
577	sp|Q9UBV8|PEF1_HUMAN	sp|Q9UBV8|PEF1_HUMAN Peflin OS=Homo sapiens GN=PEF1 PE=1 SV=1	30646.41	1	1	1	1	0	0	1	0	1	1	1	0	1	0	1	1	1	1	0	0	1	0	1	1	1	0	1	0	1	1	1	1	0	0	1	0	1	1	1	0	1	0
578	sp|Q16881|TRXR1_HUMAN	sp|Q16881|TRXR1_HUMAN Thioredoxin reductase 1, cytoplasmic OS=Homo sapiens GN=TXNRD1 PE=1 SV=3	71831.58	1	0	1	0	1	0	1	0	1	0	2	0	1	1	1	0	1	0	1	0	1	0	1	0	2	0	1	1	1	0	1	0	1	0	1	0	1	0	2	0	1	1
579	sp|P53999|TCP4_HUMAN	sp|P53999|TCP4_HUMAN Activated RNA polymerase II transcriptional coactivator p15 OS=Homo sapiens GN=SUB1 PE=1 SV=3	14386.41	0	0	0	2	0	1	0	0	0	2	0	1	1	1	0	0	0	2	0	1	0	0	0	1	0	1	1	1	0	0	0	2	0	1	0	0	0	1	0	1	1	1
580	sp|O43396|TXNL1_HUMAN	sp|O43396|TXNL1_HUMAN Thioredoxin-like protein 1 OS=Homo sapiens GN=TXNL1 PE=1 SV=3	32629.88	0	0	1	1	1	0	0	1	0	1	0	2	0	1	0	0	1	1	1	0	0	1	0	1	0	2	0	1	0	0	1	1	1	0	0	1	0	1	0	2	0	1
581	sp|O95202|LETM1_HUMAN	sp|O95202|LETM1_HUMAN LETM1 and EF-hand domain-containing protein 1, mitochondrial OS=Homo sapiens GN=LETM1 PE=1 SV=1	83986.21	0	0	0	1	0	1	1	1	1	1	0	1	0	1	0	0	0	1	0	1	1	1	1	1	0	1	0	1	0	0	0	1	0	1	1	1	1	1	0	1	0	1
582	sp|P46783|RS10_HUMAN	sp|P46783|RS10_HUMAN 40S ribosomal protein S10 OS=Homo sapiens GN=RPS10 PE=1 SV=1	18885.87	1	1	0	1	0	0	0	1	1	1	0	1	1	1	1	1	0	1	0	0	0	1	1	1	0	1	1	1	1	1	0	1	0	0	0	1	1	1	0	1	1	1
583	sp|Q0VDD7|CS057_HUMAN	sp|Q0VDD7|CS057_HUMAN Uncharacterized protein C19orf57 OS=Homo sapiens GN=C19orf57 PE=1 SV=2	70083.98	1	0	1	0	1	0	1	0	1	0	1	0	2	0	1	0	1	0	1	0	1	0	1	0	1	0	1	0	1	0	1	0	1	0	1	0	1	0	1	0	1	0
584	sp|Q9UL46|PSME2_HUMAN	sp|Q9UL46|PSME2_HUMAN Proteasome activator complex subunit 2 OS=Homo sapiens GN=PSME2 PE=1 SV=4	27555.38	1	0	1	0	1	0	1	0	1	0	1	1	1	0	1	0	1	0	1	0	1	0	1	0	1	1	1	0	1	0	1	0	1	0	1	0	1	0	1	1	1	0
585	sp|P53597|SUCA_HUMAN	SUCA_HUMAN Succinate--CoA ligase	36626.0	1	1	0	1	1	1	0	0	1	1	0	0	0	1	1	1	0	1	1	1	0	0	1	1	0	0	0	1	1	1	0	1	1	1	0	0	1	1	0	0	0	1
586	sp|P04211|LV743_HUMAN	sp|P04211|LV743_HUMAN Immunoglobulin lambda variable 7-43 OS=Homo sapiens GN=IGLV7-43 PE=3 SV=2	12671.14	1	1	1	0	1	1	1	0	0	0	1	1	0	0	1	1	1	0	1	1	1	0	0	0	1	1	0	0	1	1	1	0	1	1	1	0	0	0	1	1	0	0
587	sp|P52907|CAZA1_HUMAN	sp|P52907|CAZA1_HUMAN F-actin-capping protein subunit alpha-1 OS=Homo sapiens GN=CAPZA1 PE=1 SV=3	33073.39	1	0	1	1	1	0	0	0	0	0	1	1	1	1	1	0	1	1	1	0	0	0	0	0	1	1	1	1	1	0	1	1	1	0	0	0	0	0	1	1	1	1
588	sp|Q9H444|CHM4B_HUMAN	sp|Q9H444|CHM4B_HUMAN Charged multivesicular body protein 4b OS=Homo sapiens GN=CHMP4B PE=1 SV=1	24934.57	0	2	1	1	0	2	0	1	0	1	1	2	0	1	0	2	1	1	0	2	0	1	0	1	1	2	0	1	0	2	1	1	0	2	0	1	0	1	1	2	0	1
589	sp|Q96KP4|CNDP2_HUMAN	sp|Q96KP4|CNDP2_HUMAN Cytosolic non-specific dipeptidase OS=Homo sapiens GN=CNDP2 PE=1 SV=2	53187.04	0	0	0	0	1	0	2	1	2	1	0	1	0	0	0	0	0	0	1	0	1	1	1	1	0	1	0	0	0	0	0	0	1	0	1	1	1	1	0	1	0	0
590	sp|P12532|KCRU_HUMAN	sp|P12532|KCRU_HUMAN Creatine kinase U-type, mitochondrial OS=Homo sapiens GN=CKMT1A PE=1 SV=1	47406.36	0	0	1	1	0	1	1	0	1	1	0	1	1	0	0	0	1	1	0	1	1	0	1	1	0	1	1	0	0	0	1	1	0	1	1	0	1	1	0	1	1	0
591	sp|P00505|AATM_HUMAN	sp|P00505|AATM_HUMAN Aspartate aminotransferase, mitochondrial OS=Homo sapiens GN=GOT2 PE=1 SV=3	47886.47	1	0	1	0	1	0	1	0	1	0	1	0	1	1	1	0	1	0	1	0	1	0	1	0	1	0	1	1	1	0	1	0	1	0	1	0	1	0	1	0	1	1
592	sp|P43304|GPDM_HUMAN	sp|P43304|GPDM_HUMAN Glycerol-3-phosphate dehydrogenase, mitochondrial OS=Homo sapiens GN=GPD2 PE=1 SV=3	81314.81	1	0	1	0	2	0	1	0	1	1	0	0	1	0	1	0	1	0	2	0	1	0	1	1	0	0	1	0	1	0	1	0	2	0	1	0	1	1	0	0	1	0
593	sp|O14639|ABLM1_HUMAN	sp|O14639|ABLM1_HUMAN Actin-binding LIM protein 1 OS=Homo sapiens GN=ABLIM1 PE=1 SV=3	89512.79	0	1	1	1	0	0	0	2	1	0	1	0	0	1	0	1	1	1	0	0	0	1	1	0	1	0	0	1	0	1	1	1	0	0	0	1	1	0	1	0	0	1
594	sp|P20042|IF2B_HUMAN	sp|P20042|IF2B_HUMAN Eukaryotic translation initiation factor 2 subunit 2 OS=Homo sapiens GN=EIF2S2 PE=1 SV=2	38706.5	0	1	0	1	0	1	0	1	0	1	0	1	1	1	0	1	0	1	0	1	0	1	0	1	0	1	1	1	0	1	0	1	0	1	0	1	0	1	0	1	1	1
595	sp|Q16186|ADRM1_HUMAN	sp|Q16186|ADRM1_HUMAN Proteasomal ubiquitin receptor ADRM1 OS=Homo sapiens GN=ADRM1 PE=1 SV=2	42411.92	1	1	0	1	0	0	0	0	1	0	1	1	1	1	1	1	0	1	0	0	0	0	1	0	1	1	1	1	1	1	0	1	0	0	0	0	1	0	1	1	1	1
596	sp|Q15393|SF3B3_HUMAN	sp|Q15393|SF3B3_HUMAN Splicing factor 3B subunit 3 OS=Homo sapiens GN=SF3B3 PE=1 SV=4	136575.15	1	0	1	0	1	0	2	0	2	0	0	0	0	1	1	0	1	0	1	0	2	0	2	0	0	0	0	1	1	0	1	0	1	0	2	0	2	0	0	0	0	1
597	sp|Q07955|SRSF1_HUMAN	sp|Q07955|SRSF1_HUMAN Serine/arginine-rich splicing factor 1 OS=Homo sapiens GN=SRSF1 PE=1 SV=2	27841.86	0	0	0	1	0	1	1	1	0	1	0	1	1	1	0	0	0	1	0	1	1	1	0	1	0	1	1	1	0	0	0	1	0	1	1	1	0	1	0	1	1	1
598	sp|O95831|AIFM1_HUMAN	sp|O95831|AIFM1_HUMAN Apoptosis-inducing factor 1, mitochondrial OS=Homo sapiens GN=AIFM1 PE=1 SV=1	67144.01	0	0	0	0	2	0	1	0	1	1	1	0	2	0	0	0	0	0	2	0	1	0	1	1	1	0	2	0	0	0	0	0	2	0	1	0	1	1	1	0	2	0
599	sp|Q9UJ70|NAGK_HUMAN	sp|Q9UJ70|NAGK_HUMAN N-acetyl-D-glucosamine kinase OS=Homo sapiens GN=NAGK PE=1 SV=4	37694.05	0	1	1	1	0	1	1	0	0	0	1	0	2	0	0	1	1	1	0	1	1	0	0	0	1	0	2	0	0	1	1	1	0	1	1	0	0	0	1	0	2	0
600	sp|P27918|PROP_HUMAN	sp|P27918|PROP_HUMAN Properdin OS=Homo sapiens GN=CFP PE=1 SV=2	53750.94	0	1	0	1	0	2	0	1	0	1	0	2	0	0	0	1	0	1	0	2	0	1	0	1	0	2	0	0	0	1	0	1	0	2	0	1	0	1	0	2	0	0
601	sp|Q9P2J5|SYLC_HUMAN	sp|Q9P2J5|SYLC_HUMAN Leucine--tRNA ligase, cytoplasmic OS=Homo sapiens GN=LARS PE=1 SV=2	135576.93	1	1	0	0	1	0	1	0	1	1	1	0	1	0	1	1	0	0	1	0	1	0	1	1	1	0	1	0	1	1	0	0	1	0	1	0	1	1	1	0	1	0
602	sp|P78527|PRKDC_HUMAN	sp|P78527|PRKDC_HUMAN DNA-dependent protein kinase catalytic subunit OS=Homo sapiens GN=PRKDC PE=1 SV=3	473748.77	1	0	1	1	1	0	0	0	1	0	1	1	1	0	1	0	1	1	1	0	0	0	1	0	1	1	1	0	1	0	1	1	1	0	0	0	1	0	1	1	1	0
603	sp|P23526|SAHH_HUMAN	sp|P23526|SAHH_HUMAN Adenosylhomocysteinase OS=Homo sapiens GN=AHCY PE=1 SV=4	48255.42	0	2	1	1	0	1	0	2	0	0	0	1	0	0	0	2	1	1	0	1	0	2	0	0	0	1	0	0	0	2	1	1	0	1	0	2	0	0	0	1	0	0
604	sp|Q96L46|CPNS2_HUMAN	sp|Q96L46|CPNS2_HUMAN Calpain small subunit 2 OS=Homo sapiens GN=CAPNS2 PE=2 SV=2	27813.81	0	1	0	0	0	1	1	1	1	1	0	1	0	1	0	1	0	0	0	1	1	1	1	1	0	1	0	1	0	1	0	0	0	1	1	1	1	1	0	1	0	1
605	sp|Q8NCL4|GALT6_HUMAN	sp|Q8NCL4|GALT6_HUMAN Polypeptide N-acetylgalactosaminyltransferase 6 OS=Homo sapiens GN=GALNT6 PE=2 SV=2	72025.46	1	0	2	0	1	0	1	0	1	0	1	0	1	0	1	0	2	0	1	0	1	0	1	0	1	0	1	0	1	0	2	0	1	0	1	0	1	0	1	0	1	0
606	sp|Q08554|DSC1_HUMAN	sp|Q08554|DSC1_HUMAN Desmocollin-1 OS=Homo sapiens GN=DSC1 PE=1 SV=2	101406.31	0	1	0	0	0	2	0	1	0	1	0	2	0	1	0	1	0	0	0	1	0	1	0	1	0	1	0	1	0	1	0	0	0	1	0	1	0	1	0	1	0	1
607	sp|P13073|COX41_HUMAN	sp|P13073|COX41_HUMAN Cytochrome c oxidase subunit 4 isoform 1, mitochondrial OS=Homo sapiens GN=COX4I1 PE=1 SV=1	19621.07	1	0	1	0	1	0	0	0	1	0	1	1	2	0	1	0	1	0	1	0	0	0	1	0	1	1	1	0	1	0	1	0	1	0	0	0	1	0	1	1	1	0
608	sp|P13284|GILT_HUMAN	sp|P13284|GILT_HUMAN Gamma-interferon-inducible lysosomal thiol reductase OS=Homo sapiens GN=IFI30 PE=1 SV=3	28572.24	1	0	2	0	1	0	1	0	1	0	0	0	2	0	1	0	1	0	1	0	1	0	1	0	0	0	1	0	1	0	1	0	1	0	1	0	1	0	0	0	1	0
609	sp|Q969Q0|RL36L_HUMAN	sp|Q969Q0|RL36L_HUMAN 60S ribosomal protein L36a-like OS=Homo sapiens GN=RPL36AL PE=1 SV=3	12745.93	2	1	1	2	1	1	1	1	1	1	2	1	0	1	2	1	1	1	1	1	1	1	1	1	2	1	0	1	2	1	1	1	1	1	1	1	1	1	2	1	0	1
610	sp|P08571|CD14_HUMAN	sp|P08571|CD14_HUMAN Monocyte differentiation antigen CD14 OS=Homo sapiens GN=CD14 PE=1 SV=2	40677.98	0	1	0	1	0	0	1	2	0	1	0	1	0	1	0	1	0	1	0	0	1	2	0	1	0	1	0	1	0	1	0	1	0	0	1	2	0	1	0	1	0	1
611	sp|P62136|PP1A_HUMAN	sp|P62136|PP1A_HUMAN Serine/threonine-protein phosphatase PP1-alpha catalytic subunit OS=Homo sapiens GN=PPP1CA PE=1 SV=1	38229.08	0	1	0	2	0	0	0	1	1	1	2	0	1	3	0	1	0	2	0	0	0	1	1	1	1	0	1	2	0	1	0	2	0	0	0	1	1	1	1	0	1	2
611	sp|P62140|PP1B_HUMAN	sp|P62140|PP1B_HUMAN Serine/threonine-protein phosphatase PP1-beta catalytic subunit OS=Homo sapiens GN=PPP1CB PE=1 SV=3	37960.93	1	0	0	0	0	0	0	0	0	0	0	0	0	0	1	0	0	0	0	0	0	0	0	0	0	0	0	0	1	1	0	1	0	0	0	1	1	0	1	0	1	1
612	sp|P30085|KCY_HUMAN	sp|P30085|KCY_HUMAN UMP-CMP kinase OS=Homo sapiens GN=CMPK1 PE=1 SV=3	22436.37	0	0	1	0	1	0	1	1	1	0	1	1	0	1	0	0	1	0	1	0	1	1	1	0	1	1	0	1	0	0	1	0	1	0	1	1	1	0	1	1	0	1
613	sp|P61221|ABCE1_HUMAN	sp|P61221|ABCE1_HUMAN ATP-binding cassette sub-family E member 1 OS=Homo sapiens GN=ABCE1 PE=1 SV=1	68240.38	1	0	0	1	0	0	1	0	0	1	0	1	1	2	1	0	0	1	0	0	1	0	0	1	0	1	1	2	1	0	0	1	0	0	1	0	0	1	0	1	1	2
614	sp|P29590|PML_HUMAN	sp|P29590|PML_HUMAN Protein PML OS=Homo sapiens GN=PML PE=1 SV=3	99142.51	2	1	1	1	0	1	0	0	0	0	0	0	1	1	2	1	1	1	0	1	0	0	0	0	0	0	1	1	2	1	1	1	0	1	0	0	0	0	0	0	1	1
615	sp|P62191|PRS4_HUMAN	sp|P62191|PRS4_HUMAN 26S protease regulatory subunit 4 OS=Homo sapiens GN=PSMC1 PE=1 SV=1	49324.76	1	1	1	1	0	0	0	1	0	1	0	1	1	0	1	1	1	1	0	0	0	1	0	1	0	1	1	0	1	1	1	1	0	0	0	1	0	1	0	1	1	0
616	sp|Q92888|ARHG1_HUMAN	sp|Q92888|ARHG1_HUMAN Rho guanine nucleotide exchange factor 1 OS=Homo sapiens GN=ARHGEF1 PE=1 SV=2	103055.61	0	0	1	1	1	1	0	0	1	0	1	0	1	0	0	0	1	1	1	1	0	0	1	0	1	0	1	0	0	0	1	1	1	1	0	0	1	0	1	0	1	0
617	sp|Q9BSJ5|CQ080_HUMAN	sp|Q9BSJ5|CQ080_HUMAN Uncharacterized protein C17orf80 OS=Homo sapiens GN=C17orf80 PE=2 SV=2	68355.71	1	0	0	1	0	1	0	1	1	1	0	0	0	1	1	0	0	1	0	1	0	1	1	1	0	0	0	1	1	0	0	1	0	1	0	1	1	1	0	0	0	1
618	sp|P05026|AT1B1_HUMAN	sp|P05026|AT1B1_HUMAN Sodium/potassium-transporting ATPase subunit beta-1 OS=Homo sapiens GN=ATP1B1 PE=1 SV=1	35438.02	1	0	0	0	0	1	1	1	1	0	0	1	1	0	1	0	0	0	0	1	1	1	1	0	0	1	1	0	1	0	0	0	0	1	1	1	1	0	0	1	1	0
619	sp|P03952|KLKB1_HUMAN	sp|P03952|KLKB1_HUMAN Plasma kallikrein OS=Homo sapiens GN=KLKB1 PE=1 SV=1	73432.64	1	0	1	0	1	0	1	0	1	0	1	0	1	0	1	0	1	0	1	0	1	0	1	0	1	0	1	0	1	0	1	0	1	0	1	0	1	0	1	0	1	0
620	sp|P55084|ECHB_HUMAN	sp|P55084|ECHB_HUMAN Trifunctional enzyme subunit beta, mitochondrial OS=Homo sapiens GN=HADHB PE=1 SV=3	51546.63	0	0	0	0	1	1	0	1	0	2	0	1	0	1	0	0	0	0	1	1	0	1	0	2	0	1	0	1	0	0	0	0	1	1	0	1	0	2	0	1	0	1
621	sp|P84095|RHOG_HUMAN	sp|P84095|RHOG_HUMAN Rho-related GTP-binding protein RhoG OS=Homo sapiens GN=RHOG PE=1 SV=1	21751.1	1	0	0	0	1	0	1	0	0	0	1	1	1	1	1	0	0	0	1	0	1	0	0	0	1	1	1	1	1	0	0	0	1	0	1	0	0	0	1	1	1	1
622	sp|Q12882|DPYD_HUMAN	DPYD_HUMAN Dihydropyrimidine dehydrogenase	113382.11	1	0	1	0	1	0	1	0	1	0	1	0	1	0	1	0	1	0	1	0	1	0	1	0	1	0	1	0	1	0	1	0	1	0	1	0	1	0	1	0	1	0
623	sp|P63244|RACK1_HUMAN	sp|P63244|RACK1_HUMAN Receptor of activated protein C kinase 1 OS=Homo sapiens GN=RACK1 PE=1 SV=3	35510.73	0	1	0	1	0	1	0	1	0	1	0	1	0	1	0	1	0	1	0	1	0	1	0	1	0	1	0	1	0	1	0	1	0	1	0	1	0	1	0	1	0	1
624	sp|P15374|UCHL3_HUMAN	sp|P15374|UCHL3_HUMAN Ubiquitin carboxyl-terminal hydrolase isozyme L3 OS=Homo sapiens GN=UCHL3 PE=1 SV=1	26337.04	0	0	0	1	0	1	0	0	1	1	0	1	1	1	0	0	0	1	0	1	0	0	1	1	0	1	1	1	0	0	0	1	0	1	0	0	1	1	0	1	1	1
625	sp|Q08379|GOGA2_HUMAN	sp|Q08379|GOGA2_HUMAN Golgin subfamily A member 2 OS=Homo sapiens GN=GOLGA2 PE=1 SV=3	113643.88	0	0	1	0	1	0	1	0	1	1	0	0	1	1	0	0	1	0	1	0	1	0	1	1	0	0	1	1	0	0	1	0	1	0	1	0	1	1	0	0	1	1
626	sp|P63167|DYL1_HUMAN	sp|P63167|DYL1_HUMAN Dynein light chain 1, cytoplasmic OS=Homo sapiens GN=DYNLL1 PE=1 SV=1	10530.17	1	0	0	1	0	0	1	0	0	1	1	0	1	1	1	0	0	1	0	0	1	0	0	1	1	0	1	1	1	0	0	1	0	0	1	0	0	1	1	0	1	1
627	sp|P49788|TIG1_HUMAN	sp|P49788|TIG1_HUMAN Retinoic acid receptor responder protein 1 OS=Homo sapiens GN=RARRES1 PE=1 SV=2	33549.32	0	0	0	0	1	0	0	0	1	1	2	1	1	0	0	0	0	0	1	0	0	0	1	1	2	1	1	0	0	0	0	0	1	0	0	0	1	1	2	1	1	0
628	sp|P07305|H10_HUMAN	sp|P07305|H10_HUMAN Histone H1.0 OS=Homo sapiens GN=H1F0 PE=1 SV=3	20850.19	0	1	0	1	0	1	0	1	0	1	0	1	0	1	0	1	0	1	0	1	0	1	0	1	0	1	0	1	0	1	0	1	0	1	0	1	0	1	0	1	0	1
629	sp|Q16666|IF16_HUMAN	sp|Q16666|IF16_HUMAN Gamma-interferon-inducible protein 16 OS=Homo sapiens GN=IFI16 PE=1 SV=3	88655.61	1	0	0	0	0	1	1	1	1	0	1	1	0	0	1	0	0	0	0	1	1	1	1	0	1	1	0	0	1	0	0	0	0	1	1	1	1	0	1	1	0	0
630	sp|P37108|SRP14_HUMAN	sp|P37108|SRP14_HUMAN Signal recognition particle 14 kDa protein OS=Homo sapiens GN=SRP14 PE=1 SV=2	14674.86	0	1	0	1	0	1	0	1	1	0	1	1	0	0	0	1	0	1	0	1	0	1	1	0	1	1	0	0	0	1	0	1	0	1	0	1	1	0	1	1	0	0
631	sp|Q13630|FCL_HUMAN	sp|Q13630|FCL_HUMAN GDP-L-fucose synthase OS=Homo sapiens GN=TSTA3 PE=1 SV=1	36098.05	0	1	0	1	0	2	0	1	0	1	0	0	0	1	0	1	0	1	0	1	0	1	0	1	0	0	0	1	0	1	0	1	0	1	0	1	0	1	0	0	0	1
632	sp|Q9UNM6|PSD13_HUMAN	sp|Q9UNM6|PSD13_HUMAN 26S proteasome non-ATPase regulatory subunit 13 OS=Homo sapiens GN=PSMD13 PE=1 SV=2	43203.25	0	1	0	1	0	1	0	1	0	1	0	1	0	1	0	1	0	1	0	1	0	1	0	1	0	1	0	1	0	1	0	1	0	1	0	1	0	1	0	1	0	1
633	sp|Q8N3Y7|RDHE2_HUMAN	sp|Q8N3Y7|RDHE2_HUMAN Epidermal retinol dehydrogenase 2 OS=Homo sapiens GN=SDR16C5 PE=2 SV=2	34585.98	1	1	1	1	0	1	0	0	0	1	1	0	0	0	1	1	1	1	0	1	0	0	0	1	1	0	0	0	1	1	1	1	0	1	0	0	0	1	1	0	0	0
634	sp|Q9NZD2|GLTP_HUMAN	sp|Q9NZD2|GLTP_HUMAN Glycolipid transfer protein OS=Homo sapiens GN=GLTP PE=1 SV=3	24005.49	0	2	0	1	0	1	0	0	1	0	0	1	0	1	0	2	0	1	0	1	0	0	1	0	0	1	0	1	0	2	0	1	0	1	0	0	1	0	0	1	0	1
635	sp|Q9UHX1|PUF60_HUMAN	sp|Q9UHX1|PUF60_HUMAN Poly(U)-binding-splicing factor PUF60 OS=Homo sapiens GN=PUF60 PE=1 SV=1	60008.69	0	0	1	0	1	0	1	0	1	1	0	1	0	1	0	0	1	0	1	0	1	0	1	1	0	1	0	1	0	0	1	0	1	0	1	0	1	1	0	1	0	1
636	sp|P06727|APOA4_HUMAN	sp|P06727|APOA4_HUMAN Apolipoprotein A-IV OS=Homo sapiens GN=APOA4 PE=1 SV=3	45371.47	2	0	0	0	0	0	1	0	1	0	1	0	2	0	2	0	0	0	0	0	1	0	1	0	1	0	2	0	2	0	0	0	0	0	1	0	1	0	1	0	2	0
637	sp|P54577|SYYC_HUMAN	sp|P54577|SYYC_HUMAN Tyrosine--tRNA ligase, cytoplasmic OS=Homo sapiens GN=YARS PE=1 SV=4	59448.23	1	1	0	0	0	0	0	1	1	0	1	1	0	1	1	1	0	0	0	0	0	1	1	0	1	1	0	1	1	1	0	0	0	0	0	1	1	0	1	1	0	1
638	sp|P57737|CORO7_HUMAN	sp|P57737|CORO7_HUMAN Coronin-7 OS=Homo sapiens GN=CORO7 PE=1 SV=2	101625.75	0	0	1	0	0	1	1	0	1	0	1	0	1	1	0	0	1	0	0	1	1	0	1	0	1	0	1	1	0	0	1	0	0	1	1	0	1	0	1	0	1	1
639	sp|P19397|CD53_HUMAN	sp|P19397|CD53_HUMAN Leukocyte surface antigen CD53 OS=Homo sapiens GN=CD53 PE=1 SV=1	25008.79	0	1	0	1	0	1	0	1	0	1	0	1	0	1	0	1	0	1	0	1	0	1	0	1	0	1	0	1	0	1	0	1	0	1	0	1	0	1	0	1	0	1
640	sp|Q16629|SRSF7_HUMAN	sp|Q16629|SRSF7_HUMAN Serine/arginine-rich splicing factor 7 OS=Homo sapiens GN=SRSF7 PE=1 SV=1	27578.11	0	1	0	1	0	2	0	1	0	1	1	0	0	0	0	1	0	1	0	1	0	1	0	1	1	0	0	0	0	1	0	1	0	1	0	1	0	1	1	0	0	0
641	sp|Q9Y6U3|ADSV_HUMAN	sp|Q9Y6U3|ADSV_HUMAN Adseverin OS=Homo sapiens GN=SCIN PE=1 SV=4	80894.61	1	0	1	0	0	0	0	1	1	0	1	1	1	0	1	0	1	0	0	0	0	1	1	0	1	1	1	0	1	0	1	0	0	0	0	1	1	0	1	1	1	0
642	sp|Q12765|SCRN1_HUMAN	sp|Q12765|SCRN1_HUMAN Secernin-1 OS=Homo sapiens GN=SCRN1 PE=1 SV=2	46979.75	1	0	1	0	1	0	1	0	1	0	1	0	1	0	1	0	1	0	1	0	1	0	1	0	1	0	1	0	1	0	1	0	1	0	1	0	1	0	1	0	1	0
643	sp|P18621|RL17_HUMAN	sp|P18621|RL17_HUMAN 60S ribosomal protein L17 OS=Homo sapiens GN=RPL17 PE=1 SV=3	21611.42	0	0	0	0	1	0	1	1	1	1	0	1	0	1	0	0	0	0	1	0	1	1	1	1	0	1	0	1	0	0	0	0	1	0	1	1	1	1	0	1	0	1
644	sp|P09467|F16P1_HUMAN	sp|P09467|F16P1_HUMAN Fructose-1,6-bisphosphatase 1 OS=Homo sapiens GN=FBP1 PE=1 SV=5	37217.94	1	0	2	0	1	0	1	0	1	0	0	0	1	0	1	0	2	0	1	0	1	0	1	0	0	0	1	0	1	0	2	0	1	0	1	0	1	0	0	0	1	0
645	sp|O14964|HGS_HUMAN	sp|O14964|HGS_HUMAN Hepatocyte growth factor-regulated tyrosine kinase substrate OS=Homo sapiens GN=HGS PE=1 SV=1	86707.76	0	0	0	0	0	0	1	1	1	1	1	1	1	0	0	0	0	0	0	0	1	1	1	1	1	1	1	0	0	0	0	0	0	0	1	1	1	1	1	1	1	0
646	sp|P02750|A2GL_HUMAN	sp|P02750|A2GL_HUMAN Leucine-rich alpha-2-glycoprotein OS=Homo sapiens GN=LRG1 PE=1 SV=2	38382.2	0	0	1	1	1	0	1	0	1	0	1	0	1	0	0	0	1	1	1	0	1	0	1	0	1	0	1	0	0	0	1	1	1	0	1	0	1	0	1	0	1	0
647	sp|Q96CT7|CC124_HUMAN	sp|Q96CT7|CC124_HUMAN Coiled-coil domain-containing protein 124 OS=Homo sapiens GN=CCDC124 PE=1 SV=1	25819.56	1	1	0	1	0	1	0	1	1	0	0	1	0	0	1	1	0	1	0	1	0	1	1	0	0	1	0	0	1	1	0	1	0	1	0	1	1	0	0	1	0	0
648	sp|Q13464|ROCK1_HUMAN	sp|Q13464|ROCK1_HUMAN Rho-associated protein kinase 1 OS=Homo sapiens GN=ROCK1 PE=1 SV=1	159102.13	1	1	0	1	1	0	1	1	0	0	0	0	0	1	1	1	0	1	1	0	1	1	0	0	0	0	0	1	1	1	0	1	1	0	1	1	0	0	0	0	0	1
649	sp|O15144|ARPC2_HUMAN	sp|O15144|ARPC2_HUMAN Actin-related protein 2/3 complex subunit 2 OS=Homo sapiens GN=ARPC2 PE=1 SV=1	34425.53	0	1	1	1	1	1	0	0	1	0	0	0	0	1	0	1	1	1	1	1	0	0	1	0	0	0	0	1	0	1	1	1	1	1	0	0	1	0	0	0	0	1
650	sp|Q56VL3|OCAD2_HUMAN	sp|Q56VL3|OCAD2_HUMAN OCIA domain-containing protein 2 OS=Homo sapiens GN=OCIAD2 PE=1 SV=1	17284.7	1	0	1	1	1	1	0	1	0	0	0	1	0	0	1	0	1	1	1	1	0	1	0	0	0	1	0	0	1	0	1	1	1	1	0	1	0	0	0	1	0	0
651	sp|Q9NZP8|C1RL_HUMAN	sp|Q9NZP8|C1RL_HUMAN Complement C1r subcomponent-like protein OS=Homo sapiens GN=C1RL PE=1 SV=2	54205.62	1	0	1	0	1	0	1	0	1	0	1	0	1	0	1	0	1	0	1	0	1	0	1	0	1	0	1	0	1	0	1	0	1	0	1	0	1	0	1	0	1	0
652	sp|P46459|NSF_HUMAN	sp|P46459|NSF_HUMAN Vesicle-fusing ATPase OS=Homo sapiens GN=NSF PE=1 SV=3	83055.27	1	0	1	0	1	0	1	0	1	0	1	0	1	0	1	0	1	0	1	0	1	0	1	0	1	0	1	0	1	0	1	0	1	0	1	0	1	0	1	0	1	0
653	sp|P22234|PUR6_HUMAN	sp|P22234|PUR6_HUMAN Multifunctional protein ADE2 OS=Homo sapiens GN=PAICS PE=1 SV=3	47790.42	0	0	1	0	1	0	1	0	1	0	1	0	1	0	0	0	1	0	1	0	1	0	1	0	1	0	1	0	0	0	1	0	1	0	1	0	1	0	1	0	1	0
654	sp|P01768|HV330_HUMAN	sp|P01768|HV330_HUMAN Immunoglobulin heavy variable 3-30 OS=Homo sapiens GN=IGHV3-30 PE=1 SV=2	13109.51	1	1	1	0	1	0	1	0	0	0	1	0	0	0	1	1	1	0	1	0	1	0	0	0	1	0	0	0	1	1	1	0	1	0	1	0	0	0	1	0	0	0
655	sp|Q99613|EIF3C_HUMAN	sp|Q99613|EIF3C_HUMAN Eukaryotic translation initiation factor 3 subunit C OS=Homo sapiens GN=EIF3C PE=1 SV=1	105961.98	0	1	0	0	0	1	0	1	0	1	0	1	0	1	0	1	0	0	0	1	0	1	0	1	0	1	0	1	0	1	0	0	0	1	0	1	0	1	0	1	0	1
656	sp|Q8NCW5|NNRE_HUMAN	sp|Q8NCW5|NNRE_HUMAN NAD(P)H-hydrate epimerase OS=Homo sapiens GN=NAXE PE=1 SV=2	31996.37	0	0	1	0	0	0	1	1	1	0	1	0	1	0	0	0	1	0	0	0	1	1	1	0	1	0	1	0	0	0	1	0	0	0	1	1	1	0	1	0	1	0
657	sp|O00299|CLIC1_HUMAN	sp|O00299|CLIC1_HUMAN Chloride intracellular channel protein 1 OS=Homo sapiens GN=CLIC1 PE=1 SV=4	27247.88	1	0	0	1	1	1	1	0	0	0	0	0	0	1	1	0	0	1	1	1	1	0	0	0	0	0	0	1	1	0	0	1	1	1	1	0	0	0	0	0	0	1
658	sp|Q53FA7|QORX_HUMAN	sp|Q53FA7|QORX_HUMAN Quinone oxidoreductase PIG3 OS=Homo sapiens GN=TP53I3 PE=1 SV=2	35684.65	1	0	1	0	1	0	0	0	1	0	1	1	0	0	1	0	1	0	1	0	0	0	1	0	1	1	0	0	1	0	1	0	1	0	0	0	1	0	1	1	0	0
659	sp|Q14894|CRYM_HUMAN	sp|Q14894|CRYM_HUMAN Ketimine reductase mu-crystallin OS=Homo sapiens GN=CRYM PE=1 SV=1	33925.44	0	0	1	0	1	0	1	0	1	0	1	0	1	0	0	0	1	0	1	0	1	0	1	0	1	0	1	0	0	0	1	0	1	0	1	0	1	0	1	0	1	0
660	sp|A6NNZ2|TBB8L_HUMAN	sp|A6NNZ2|TBB8L_HUMAN Tubulin beta-8 chain-like protein LOC260334 OS=Homo sapiens PE=1 SV=1	50167.84	0	0	0	0	0	0	1	1	1	1	0	1	0	1	0	0	0	0	0	0	1	1	1	1	0	1	0	1	0	0	0	0	0	0	1	1	1	1	0	1	0	1
661	sp|Q14914|PTGR1_HUMAN	sp|Q14914|PTGR1_HUMAN Prostaglandin reductase 1 OS=Homo sapiens GN=PTGR1 PE=1 SV=2	36074.81	0	0	0	0	1	0	0	1	1	0	0	1	1	1	0	0	0	0	1	0	0	1	1	0	0	1	1	1	0	0	0	0	1	0	0	1	1	0	0	1	1	1
662	sp|P48444|COPD_HUMAN	sp|P48444|COPD_HUMAN Coatomer subunit delta OS=Homo sapiens GN=ARCN1 PE=1 SV=1	57630.3	0	0	0	0	0	0	2	0	0	0	0	1	2	1	0	0	0	0	0	0	2	0	0	0	0	1	2	1	0	0	0	0	0	0	2	0	0	0	0	1	2	1
663	sp|Q9Y383|LC7L2_HUMAN	sp|Q9Y383|LC7L2_HUMAN Putative RNA-binding protein Luc7-like 2 OS=Homo sapiens GN=LUC7L2 PE=1 SV=2	46941.76	0	1	0	1	1	0	0	1	0	1	0	1	1	0	0	1	0	1	1	0	0	1	0	1	0	1	1	0	0	1	0	1	1	0	0	1	0	1	0	1	1	0
664	sp|O43657|TSN6_HUMAN	sp|O43657|TSN6_HUMAN Tetraspanin-6 OS=Homo sapiens GN=TSPAN6 PE=1 SV=1	28172.31	1	0	0	0	1	0	1	0	1	0	1	0	1	0	1	0	0	0	1	0	1	0	1	0	1	0	1	0	1	0	0	0	1	0	1	0	1	0	1	0	1	0
665	sp|P62633|CNBP_HUMAN	sp|P62633|CNBP_HUMAN Cellular nucleic acid-binding protein OS=Homo sapiens GN=CNBP PE=1 SV=1	20704.04	0	1	0	0	0	0	0	1	0	1	1	1	0	1	0	1	0	0	0	0	0	1	0	1	1	1	0	1	0	1	0	0	0	0	0	1	0	1	1	1	0	1
666	sp|P50914|RL14_HUMAN	sp|P50914|RL14_HUMAN 60S ribosomal protein L14 OS=Homo sapiens GN=RPL14 PE=1 SV=4	23531.06	0	0	1	0	1	0	1	0	1	0	1	0	1	0	0	0	1	0	1	0	1	0	1	0	1	0	1	0	0	0	1	0	1	0	1	0	1	0	1	0	1	0
667	sp|P02652|APOA2_HUMAN	sp|P02652|APOA2_HUMAN Apolipoprotein A-II OS=Homo sapiens GN=APOA2 PE=1 SV=1	11281.94	1	1	0	1	1	2	0	0	0	0	0	0	0	0	1	1	0	1	1	1	0	0	0	0	0	0	0	0	1	1	0	1	1	1	0	0	0	0	0	0	0	0
668	sp|P26196|DDX6_HUMAN	sp|P26196|DDX6_HUMAN Probable ATP-dependent RNA helicase DDX6 OS=Homo sapiens GN=DDX6 PE=1 SV=2	54781.46	0	0	0	1	0	1	0	1	0	1	0	1	0	1	0	0	0	1	0	1	0	1	0	1	0	1	0	1	0	0	0	1	0	1	0	1	0	1	0	1	0	1
669	sp|P62913|RL11_HUMAN	sp|P62913|RL11_HUMAN 60S ribosomal protein L11 OS=Homo sapiens GN=RPL11 PE=1 SV=2	20467.73	1	0	0	0	1	1	1	0	0	0	0	0	0	2	1	0	0	0	1	1	1	0	0	0	0	0	0	2	1	0	0	0	1	1	1	0	0	0	0	0	0	2
670	sp|P13693|TCTP_HUMAN	sp|P13693|TCTP_HUMAN Translationally-controlled tumor protein OS=Homo sapiens GN=TPT1 PE=1 SV=1	19696.62	0	0	1	0	1	0	1	0	0	2	0	1	0	0	0	0	1	0	1	0	1	0	0	2	0	1	0	0	0	0	1	0	1	0	1	0	0	2	0	1	0	0
671	sp|Q14789|GOGB1_HUMAN	sp|Q14789|GOGB1_HUMAN Golgin subfamily B member 1 OS=Homo sapiens GN=GOLGB1 PE=1 SV=2	377215.18	0	1	0	1	0	1	0	1	0	0	0	1	0	1	0	1	0	1	0	1	0	1	0	0	0	1	0	1	0	1	0	1	0	1	0	1	0	0	0	1	0	1
672	sp|P25025|CXCR2_HUMAN	sp|P25025|CXCR2_HUMAN C-X-C chemokine receptor type 2 OS=Homo sapiens GN=CXCR2 PE=1 SV=2	41245.85	0	1	0	1	0	1	0	0	0	1	0	1	0	1	0	1	0	1	0	1	0	0	0	1	0	1	0	1	0	1	0	1	0	1	0	0	0	1	0	1	0	1
673	sp|P63208|SKP1_HUMAN	sp|P63208|SKP1_HUMAN S-phase kinase-associated protein 1 OS=Homo sapiens GN=SKP1 PE=1 SV=2	18817.31	0	0	1	0	0	0	1	0	1	2	0	1	0	0	0	0	1	0	0	0	1	0	1	2	0	1	0	0	0	0	1	0	0	0	1	0	1	2	0	1	0	0
674	sp|O75884|RBBP9_HUMAN	sp|O75884|RBBP9_HUMAN Putative hydrolase RBBP9 OS=Homo sapiens GN=RBBP9 PE=1 SV=2	21214.56	1	0	1	0	1	0	0	0	1	0	1	0	1	0	1	0	1	0	1	0	0	0	1	0	1	0	1	0	1	0	1	0	1	0	0	0	1	0	1	0	1	0
675	sp|P08590|MYL3_HUMAN	sp|P08590|MYL3_HUMAN Myosin light chain 3 OS=Homo sapiens GN=MYL3 PE=1 SV=3	22088.99	0	2	1	0	0	0	1	0	0	0	0	2	0	0	0	1	1	0	0	0	1	0	0	0	0	1	0	0	0	1	1	0	0	0	1	0	0	0	0	1	0	0
676	sp|Q00688|FKBP3_HUMAN	sp|Q00688|FKBP3_HUMAN Peptidyl-prolyl cis-trans isomerase FKBP3 OS=Homo sapiens GN=FKBP3 PE=1 SV=1	25218.34	0	0	0	1	0	1	0	1	0	1	0	1	0	1	0	0	0	1	0	1	0	1	0	1	0	1	0	1	0	0	0	1	0	1	0	1	0	1	0	1	0	1
677	sp|P20933|ASPG_HUMAN	sp|P20933|ASPG_HUMAN N(4)-(beta-N-acetylglucosaminyl)-L-asparaginase OS=Homo sapiens GN=AGA PE=1 SV=2	37811.55	1	0	1	0	1	0	0	0	0	0	2	0	1	0	1	0	1	0	1	0	0	0	0	0	2	0	1	0	1	0	1	0	1	0	0	0	0	0	2	0	1	0
678	sp|Q6JBY9|CPZIP_HUMAN	sp|Q6JBY9|CPZIP_HUMAN CapZ-interacting protein OS=Homo sapiens GN=RCSD1 PE=1 SV=1	44762.12	1	0	1	0	1	0	1	0	1	0	1	0	0	0	1	0	1	0	1	0	1	0	1	0	1	0	0	0	1	0	1	0	1	0	1	0	1	0	1	0	0	0
679	sp|P48637|GSHB_HUMAN	sp|P48637|GSHB_HUMAN Glutathione synthetase OS=Homo sapiens GN=GSS PE=1 SV=1	52523.32	0	0	1	1	1	1	0	0	1	0	1	0	0	0	0	0	1	1	1	1	0	0	1	0	1	0	0	0	0	0	1	1	1	1	0	0	1	0	1	0	0	0
680	sp|Q8IWA5|CTL2_HUMAN	sp|Q8IWA5|CTL2_HUMAN Choline transporter-like protein 2 OS=Homo sapiens GN=SLC44A2 PE=1 SV=3	81610.1	0	1	0	1	0	1	0	1	0	1	0	1	0	0	0	1	0	1	0	1	0	1	0	1	0	1	0	0	0	1	0	1	0	1	0	1	0	1	0	1	0	0
681	sp|P50570|DYN2_HUMAN	sp|P50570|DYN2_HUMAN Dynamin-2 OS=Homo sapiens GN=DNM2 PE=1 SV=2	98345.29	0	0	0	2	0	1	0	0	0	1	0	2	0	1	0	0	0	2	0	1	0	0	0	1	0	2	0	1	0	0	0	2	0	1	0	0	0	1	0	2	0	1
682	sp|P07357|CO8A_HUMAN	sp|P07357|CO8A_HUMAN Complement component C8 alpha chain OS=Homo sapiens GN=C8A PE=1 SV=2	66831.68	1	0	1	0	1	0	1	0	0	0	1	0	1	0	1	0	1	0	1	0	1	0	0	0	1	0	1	0	1	0	1	0	1	0	1	0	0	0	1	0	1	0
683	sp|P07384|CAN1_HUMAN	sp|P07384|CAN1_HUMAN Calpain-1 catalytic subunit OS=Homo sapiens GN=CAPN1 PE=1 SV=1	82465.42	1	0	0	0	0	0	1	1	0	0	1	1	1	0	1	0	0	0	0	0	1	1	0	0	1	1	1	0	1	0	0	0	0	0	1	1	0	0	1	1	1	0
684	sp|Q15067|ACOX1_HUMAN	sp|Q15067|ACOX1_HUMAN Peroxisomal acyl-coenzyme A oxidase 1 OS=Homo sapiens GN=ACOX1 PE=1 SV=3	74889.38	1	0	1	0	1	0	1	1	1	0	0	0	0	0	1	0	1	0	1	0	1	1	1	0	0	0	0	0	1	0	1	0	1	0	1	1	1	0	0	0	0	0
685	sp|O15389|SIGL5_HUMAN	sp|O15389|SIGL5_HUMAN Sialic acid-binding Ig-like lectin 5 OS=Homo sapiens GN=SIGLEC5 PE=1 SV=1	61589.02	0	1	0	1	0	0	0	1	0	1	0	1	0	1	0	1	0	1	0	0	0	1	0	1	0	1	0	1	0	1	0	1	0	0	0	1	0	1	0	1	0	1
686	sp|Q9BW60|ELOV1_HUMAN	sp|Q9BW60|ELOV1_HUMAN Elongation of very long chain fatty acids protein 1 OS=Homo sapiens GN=ELOVL1 PE=1 SV=1	32754.83	0	1	0	1	0	1	0	1	0	1	0	0	0	1	0	1	0	1	0	1	0	1	0	1	0	0	0	1	0	1	0	1	0	1	0	1	0	1	0	0	0	1
687	sp|P47895|AL1A3_HUMAN	sp|P47895|AL1A3_HUMAN Aldehyde dehydrogenase family 1 member A3 OS=Homo sapiens GN=ALDH1A3 PE=1 SV=2	56871.12	0	0	0	1	0	1	0	1	0	1	0	1	0	1	0	0	0	1	0	1	0	1	0	1	0	1	0	1	0	0	0	1	0	1	0	1	0	1	0	1	0	1
688	sp|Q8WXH0|SYNE2_HUMAN	sp|Q8WXH0|SYNE2_HUMAN Nesprin-2 OS=Homo sapiens GN=SYNE2 PE=1 SV=3	801816.73	1	0	1	0	1	0	1	0	0	0	1	0	1	0	1	0	1	0	1	0	1	0	0	0	1	0	1	0	1	0	1	0	1	0	1	0	0	0	1	0	1	0
689	sp|O75368|SH3L1_HUMAN	sp|O75368|SH3L1_HUMAN SH3 domain-binding glutamic acid-rich-like protein OS=Homo sapiens GN=SH3BGRL PE=1 SV=1	12766.38	0	0	1	0	1	0	1	1	1	0	0	1	0	0	0	0	1	0	1	0	1	1	1	0	0	1	0	0	0	0	1	0	1	0	1	1	1	0	0	1	0	0
690	sp|P51884|LUM_HUMAN	sp|P51884|LUM_HUMAN Lumican OS=Homo sapiens GN=LUM PE=1 SV=2	38746.92	0	1	1	0	0	0	0	0	1	1	0	1	1	0	0	1	1	0	0	0	0	0	1	1	0	1	1	0	0	1	1	0	0	0	0	0	1	1	0	1	1	0
691	sp|P35232|PHB_HUMAN	sp|P35232|PHB_HUMAN Prohibitin OS=Homo sapiens GN=PHB PE=1 SV=1	29842.92	0	1	0	0	0	1	0	1	0	1	0	1	0	1	0	1	0	0	0	1	0	1	0	1	0	1	0	1	0	1	0	0	0	1	0	1	0	1	0	1	0	1
692	sp|Q9Y263|PLAP_HUMAN	sp|Q9Y263|PLAP_HUMAN Phospholipase A-2-activating protein OS=Homo sapiens GN=PLAA PE=1 SV=2	88640.93	0	0	1	0	0	0	1	0	1	0	3	0	0	0	0	0	1	0	0	0	1	0	1	0	3	0	0	0	0	0	1	0	0	0	1	0	1	0	3	0	0	0
693	sp|P30405|PPIF_HUMAN	sp|P30405|PPIF_HUMAN Peptidyl-prolyl cis-trans isomerase F, mitochondrial OS=Homo sapiens GN=PPIF PE=1 SV=1	22368.33	1	0	1	0	1	0	1	0	1	0	0	0	1	0	1	0	1	0	1	0	1	0	1	0	0	0	1	0	1	0	1	0	1	0	1	0	1	0	0	0	1	0
694	sp|P11279|LAMP1_HUMAN	sp|P11279|LAMP1_HUMAN Lysosome-associated membrane glycoprotein 1 OS=Homo sapiens GN=LAMP1 PE=1 SV=3	45367.01	0	1	0	0	0	1	0	1	0	1	0	1	0	1	0	1	0	0	0	1	0	1	0	1	0	1	0	1	0	1	0	0	0	1	0	1	0	1	0	1	0	1
695	sp|Q92522|H1X_HUMAN	sp|Q92522|H1X_HUMAN Histone H1x OS=Homo sapiens GN=H1FX PE=1 SV=1	22473.53	0	1	0	0	0	1	0	1	0	1	0	1	0	1	0	1	0	0	0	1	0	1	0	1	0	1	0	1	0	1	0	0	0	1	0	1	0	1	0	1	0	1
696	sp|P62851|RS25_HUMAN	sp|P62851|RS25_HUMAN 40S ribosomal protein S25 OS=Homo sapiens GN=RPS25 PE=1 SV=1	13790.72	1	1	1	0	1	0	1	0	0	0	0	0	0	1	1	1	1	0	1	0	1	0	0	0	0	0	0	1	1	1	1	0	1	0	1	0	0	0	0	0	0	1
697	sp|Q8NBJ4|GOLM1_HUMAN	sp|Q8NBJ4|GOLM1_HUMAN Golgi membrane protein 1 OS=Homo sapiens GN=GOLM1 PE=1 SV=1	45476.83	1	0	0	0	1	0	2	0	0	0	1	0	1	0	1	0	0	0	1	0	2	0	0	0	1	0	1	0	1	0	0	0	1	0	2	0	0	0	1	0	1	0
698	sp|Q14152|EIF3A_HUMAN	sp|Q14152|EIF3A_HUMAN Eukaryotic translation initiation factor 3 subunit A OS=Homo sapiens GN=EIF3A PE=1 SV=1	166867.46	0	0	0	1	0	1	0	2	0	0	0	1	1	0	0	0	0	1	0	1	0	2	0	0	0	1	1	0	0	0	0	1	0	1	0	2	0	0	0	1	1	0
699	sp|P09668|CATH_HUMAN	sp|P09668|CATH_HUMAN Pro-cathepsin H OS=Homo sapiens GN=CTSH PE=1 SV=4	38053.29	0	0	1	0	1	0	1	0	1	0	1	0	1	0	0	0	1	0	1	0	1	0	1	0	1	0	1	0	0	0	1	0	1	0	1	0	1	0	1	0	1	0
700	sp|Q9UDY2|ZO2_HUMAN	sp|Q9UDY2|ZO2_HUMAN Tight junction protein ZO-2 OS=Homo sapiens GN=TJP2 PE=1 SV=2	134104.36	0	0	0	0	0	0	1	0	1	0	2	0	2	0	0	0	0	0	0	0	1	0	1	0	2	0	2	0	0	0	0	0	0	0	1	0	1	0	2	0	2	0
701	sp|Q9HC38|GLOD4_HUMAN	sp|Q9HC38|GLOD4_HUMAN Glyoxalase domain-containing protein 4 OS=Homo sapiens GN=GLOD4 PE=1 SV=1	35170.4	1	0	1	0	1	0	1	0	0	0	1	0	1	0	1	0	1	0	1	0	1	0	0	0	1	0	1	0	1	0	1	0	1	0	1	0	0	0	1	0	1	0
702	sp|Q9UQE7|SMC3_HUMAN	sp|Q9UQE7|SMC3_HUMAN Structural maintenance of chromosomes protein 3 OS=Homo sapiens GN=SMC3 PE=1 SV=2	141852.98	0	0	0	1	0	0	1	0	0	1	0	1	1	1	0	0	0	1	0	0	1	0	0	1	0	1	1	1	0	0	0	1	0	0	1	0	0	1	0	1	1	1
703	sp|P04004|VTNC_HUMAN	sp|P04004|VTNC_HUMAN Vitronectin OS=Homo sapiens GN=VTN PE=1 SV=1	55069.47	1	0	0	0	1	1	0	1	1	0	1	0	0	0	1	0	0	0	1	1	0	1	1	0	1	0	0	0	1	0	0	0	1	1	0	1	1	0	1	0	0	0
704	sp|P43405|KSYK_HUMAN	sp|P43405|KSYK_HUMAN Tyrosine-protein kinase SYK OS=Homo sapiens GN=SYK PE=1 SV=1	72533.48	1	0	0	0	0	1	0	1	0	1	0	0	0	1	1	0	0	0	0	1	0	1	0	1	0	0	0	1	1	0	0	0	0	1	0	1	0	1	0	0	0	1
705	sp|P21796|VDAC1_HUMAN	sp|P21796|VDAC1_HUMAN Voltage-dependent anion-selective channel protein 1 OS=Homo sapiens GN=VDAC1 PE=1 SV=2	30867.61	0	0	0	0	0	0	1	0	0	1	1	1	0	1	0	0	0	0	0	0	1	0	0	1	1	1	0	1	0	0	0	0	0	0	1	0	0	1	1	1	0	1
706	sp|Q9Y3I0|RTCB_HUMAN	sp|Q9Y3I0|RTCB_HUMAN tRNA-splicing ligase RtcB homolog OS=Homo sapiens GN=RTCB PE=1 SV=1	55688.05	0	0	0	0	0	0	1	1	0	1	0	0	1	1	0	0	0	0	0	0	1	1	0	1	0	0	1	1	0	0	0	0	0	0	1	1	0	1	0	0	1	1
707	sp|O15162|PLS1_HUMAN	sp|O15162|PLS1_HUMAN Phospholipid scramblase 1 OS=Homo sapiens GN=PLSCR1 PE=1 SV=1	36052.24	0	0	0	0	0	0	0	1	1	1	0	1	0	1	0	0	0	0	0	0	0	1	1	1	0	1	0	1	0	0	0	0	0	0	0	1	1	1	0	1	0	1
708	sp|Q9BQE3|TBA1C_HUMAN	sp|Q9BQE3|TBA1C_HUMAN Tubulin alpha-1C chain OS=Homo sapiens GN=TUBA1C PE=1 SV=1	50547.72	0	1	1	1	1	1	1	2	1	1	1	2	1	1	0	1	1	1	1	1	1	2	1	1	1	2	1	1	0	1	1	1	1	1	1	2	1	1	1	2	1	1
709	sp|Q13488|VPP3_HUMAN	sp|Q13488|VPP3_HUMAN V-type proton ATPase 116 kDa subunit a isoform 3 OS=Homo sapiens GN=TCIRG1 PE=1 SV=3	93649.63	0	0	0	1	0	1	0	0	0	1	0	1	0	1	0	0	0	1	0	1	0	0	0	1	0	1	0	1	0	0	0	1	0	1	0	0	0	1	0	1	0	1
710	sp|O75347|TBCA_HUMAN	sp|O75347|TBCA_HUMAN Tubulin-specific chaperone A OS=Homo sapiens GN=TBCA PE=1 SV=3	12903.73	0	1	1	1	1	0	0	0	1	0	0	0	0	0	0	1	1	1	1	0	0	0	1	0	0	0	0	0	0	1	1	1	1	0	0	0	1	0	0	0	0	0
711	sp|P81605|DCD_HUMAN	sp|P81605|DCD_HUMAN Dermcidin OS=Homo sapiens GN=DCD PE=1 SV=2	11390.87	0	0	1	0	1	0	0	0	1	0	1	0	1	0	0	0	1	0	1	0	0	0	1	0	1	0	1	0	0	0	1	0	1	0	0	0	1	0	1	0	1	0
712	sp|Q8N3K9|CMYA5_HUMAN	sp|Q8N3K9|CMYA5_HUMAN Cardiomyopathy-associated protein 5 OS=Homo sapiens GN=CMYA5 PE=1 SV=3	450760.18	1	1	0	0	1	1	0	0	0	0	0	0	1	0	1	1	0	0	1	1	0	0	0	0	0	0	1	0	1	1	0	0	1	1	0	0	0	0	0	0	1	0
713	sp|Q9NR45|SIAS_HUMAN	sp|Q9NR45|SIAS_HUMAN Sialic acid synthase OS=Homo sapiens GN=NANS PE=1 SV=2	40737.63	1	0	0	0	1	0	0	0	0	0	1	0	2	0	1	0	0	0	1	0	0	0	0	0	1	0	1	0	1	0	0	0	1	0	0	0	0	0	1	0	1	0
714	sp|P23246|SFPQ_HUMAN	sp|P23246|SFPQ_HUMAN Splicing factor, proline- and glutamine-rich OS=Homo sapiens GN=SFPQ PE=1 SV=2	76215.67	0	1	0	0	0	1	0	1	0	1	1	0	0	0	0	1	0	0	0	1	0	1	0	1	1	0	0	0	0	1	0	0	0	1	0	1	0	1	1	0	0	0
715	sp|O94776|MTA2_HUMAN	sp|O94776|MTA2_HUMAN Metastasis-associated protein MTA2 OS=Homo sapiens GN=MTA2 PE=1 SV=1	75717.02	0	1	0	0	0	0	0	1	0	1	0	1	0	1	0	1	0	0	0	0	0	1	0	1	0	1	0	1	0	1	0	0	0	0	0	1	0	1	0	1	0	1
716	sp|O75635|SPB7_HUMAN	sp|O75635|SPB7_HUMAN Serpin B7 OS=Homo sapiens GN=SERPINB7 PE=1 SV=1	43162.6	0	1	0	1	0	1	0	1	0	1	0	0	0	0	0	1	0	1	0	1	0	1	0	1	0	0	0	0	0	1	0	1	0	1	0	1	0	1	0	0	0	0
717	sp|Q8N9Z2|CC71L_HUMAN	sp|Q8N9Z2|CC71L_HUMAN Coiled-coil domain-containing protein 71L OS=Homo sapiens GN=CCDC71L PE=1 SV=2	26473.05	0	0	0	0	0	0	1	0	1	1	0	1	1	0	0	0	0	0	0	0	1	0	1	1	0	1	1	0	0	0	0	0	0	0	1	0	1	1	0	1	1	0
718	sp|Q96CX2|KCD12_HUMAN	sp|Q96CX2|KCD12_HUMAN BTB/POZ domain-containing protein KCTD12 OS=Homo sapiens GN=KCTD12 PE=1 SV=1	35963.8	0	1	0	1	0	1	0	1	0	0	0	1	0	0	0	1	0	1	0	1	0	1	0	0	0	1	0	0	0	1	0	1	0	1	0	1	0	0	0	1	0	0
719	sp|P01742|HV169_HUMAN	sp|P01742|HV169_HUMAN Immunoglobulin heavy variable 1-69 OS=Homo sapiens GN=IGHV1-69 PE=1 SV=2	12765.35	0	0	0	1	0	1	0	1	0	0	0	1	0	1	0	0	0	1	0	1	0	1	0	0	0	1	0	1	0	0	0	1	0	1	0	1	0	0	0	1	0	1
720	sp|P62241|RS8_HUMAN	sp|P62241|RS8_HUMAN 40S ribosomal protein S8 OS=Homo sapiens GN=RPS8 PE=1 SV=2	24475.27	0	1	1	0	0	1	0	0	0	0	1	0	1	0	0	1	1	0	0	1	0	0	0	0	1	0	1	0	0	1	1	0	0	1	0	0	0	0	1	0	1	0
721	sp|Q9H8S9|MOB1A_HUMAN	sp|Q9H8S9|MOB1A_HUMAN MOB kinase activator 1A OS=Homo sapiens GN=MOB1A PE=1 SV=4	25234.67	0	1	0	0	0	1	0	0	0	1	0	1	0	1	0	1	0	0	0	1	0	0	0	1	0	1	0	1	0	1	0	0	0	1	0	0	0	1	0	1	0	1
722	sp|Q13217|DNJC3_HUMAN	sp|Q13217|DNJC3_HUMAN DnaJ homolog subfamily C member 3 OS=Homo sapiens GN=DNAJC3 PE=1 SV=1	58000.34	0	0	0	1	0	0	0	1	0	1	0	1	0	1	0	0	0	1	0	0	0	1	0	1	0	1	0	1	0	0	0	1	0	0	0	1	0	1	0	1	0	1
723	sp|P50452|SPB8_HUMAN	sp|P50452|SPB8_HUMAN Serpin B8 OS=Homo sapiens GN=SERPINB8 PE=1 SV=2	43309.41	0	1	0	0	0	0	0	1	0	1	0	1	0	1	0	1	0	0	0	0	0	1	0	1	0	1	0	1	0	1	0	0	0	0	0	1	0	1	0	1	0	1
724	sp|Q9BUP3|HTAI2_HUMAN	sp|Q9BUP3|HTAI2_HUMAN Oxidoreductase HTATIP2 OS=Homo sapiens GN=HTATIP2 PE=1 SV=2	27260.07	0	1	0	0	0	0	1	1	0	0	0	2	0	0	0	1	0	0	0	0	1	1	0	0	0	2	0	0	0	1	0	0	0	0	1	1	0	0	0	2	0	0
725	sp|Q12913|PTPRJ_HUMAN	sp|Q12913|PTPRJ_HUMAN Receptor-type tyrosine-protein phosphatase eta OS=Homo sapiens GN=PTPRJ PE=1 SV=3	147048.13	0	0	0	1	0	0	1	0	0	0	0	1	1	1	0	0	0	1	0	0	1	0	0	0	0	1	1	1	0	0	0	1	0	0	1	0	0	0	0	1	1	1
726	sp|B0I1T2|MYO1G_HUMAN	sp|B0I1T2|MYO1G_HUMAN Unconventional myosin-Ig OS=Homo sapiens GN=MYO1G PE=1 SV=2	117395.32	0	0	0	1	0	0	0	1	0	1	0	1	0	1	0	0	0	1	0	0	0	1	0	1	0	1	0	1	0	0	0	1	0	0	0	1	0	1	0	1	0	1
727	sp|Q8WY22|BRI3B_HUMAN	sp|Q8WY22|BRI3B_HUMAN BRI3-binding protein OS=Homo sapiens GN=BRI3BP PE=1 SV=1	27931.88	0	0	0	1	0	1	0	1	0	0	0	1	0	1	0	0	0	1	0	1	0	1	0	0	0	1	0	1	0	0	0	1	0	1	0	1	0	0	0	1	0	1
728	sp|Q01130|SRSF2_HUMAN	sp|Q01130|SRSF2_HUMAN Serine/arginine-rich splicing factor 2 OS=Homo sapiens GN=SRSF2 PE=1 SV=4	25461.18	0	0	0	0	0	0	1	1	0	1	1	1	0	0	0	0	0	0	0	0	1	1	0	1	1	1	0	0	0	0	0	0	0	0	1	1	0	1	1	1	0	0
729	sp|Q15631|TSN_HUMAN	sp|Q15631|TSN_HUMAN Translin OS=Homo sapiens GN=TSN PE=1 SV=1	26280.82	0	0	0	0	1	0	1	1	1	0	0	1	0	0	0	0	0	0	1	0	1	1	1	0	0	1	0	0	0	0	0	0	1	0	1	1	1	0	0	1	0	0
730	sp|P35659|DEK_HUMAN	sp|P35659|DEK_HUMAN Protein DEK OS=Homo sapiens GN=DEK PE=1 SV=1	42933.03	0	0	0	1	0	0	0	1	0	1	0	1	0	1	0	0	0	1	0	0	0	1	0	1	0	1	0	1	0	0	0	1	0	0	0	1	0	1	0	1	0	1
731	sp|P50148|GNAQ_HUMAN	sp|P50148|GNAQ_HUMAN Guanine nucleotide-binding protein G(q) subunit alpha OS=Homo sapiens GN=GNAQ PE=1 SV=4	42400.42	0	1	0	0	0	1	0	2	0	0	0	1	0	0	0	1	0	0	0	1	0	1	0	0	0	1	0	0	0	1	0	0	0	1	0	1	0	0	0	1	0	0
732	sp|Q9UN37|VPS4A_HUMAN	sp|Q9UN37|VPS4A_HUMAN Vacuolar protein sorting-associated protein 4A OS=Homo sapiens GN=VPS4A PE=1 SV=1	49152.11	0	0	1	1	0	1	0	0	0	0	0	2	0	0	0	0	1	1	0	1	0	0	0	0	0	2	0	0	0	0	1	1	0	1	0	0	0	0	0	2	0	0
733	sp|P02511|CRYAB_HUMAN	sp|P02511|CRYAB_HUMAN Alpha-crystallin B chain OS=Homo sapiens GN=CRYAB PE=1 SV=2	20146.42	0	0	0	1	0	1	0	1	0	1	0	0	0	1	0	0	0	1	0	1	0	1	0	1	0	0	0	1	0	0	0	1	0	1	0	1	0	1	0	0	0	1
734	sp|Q9Y376|CAB39_HUMAN	sp|Q9Y376|CAB39_HUMAN Calcium-binding protein 39 OS=Homo sapiens GN=CAB39 PE=1 SV=1	40014.81	0	1	0	1	0	1	0	0	0	1	0	1	0	0	0	1	0	1	0	1	0	0	0	1	0	1	0	0	0	1	0	1	0	1	0	0	0	1	0	1	0	0
735	sp|P40306|PSB10_HUMAN	sp|P40306|PSB10_HUMAN Proteasome subunit beta type-10 OS=Homo sapiens GN=PSMB10 PE=1 SV=1	29203.17	0	0	1	0	0	0	1	0	2	0	1	0	0	0	0	0	1	0	0	0	1	0	2	0	1	0	0	0	0	0	1	0	0	0	1	0	2	0	1	0	0	0
736	sp|Q9UHL4|DPP2_HUMAN	sp|Q9UHL4|DPP2_HUMAN Dipeptidyl peptidase 2 OS=Homo sapiens GN=DPP7 PE=1 SV=3	54763.37	1	0	1	0	1	0	1	0	0	0	0	0	1	0	1	0	1	0	1	0	1	0	0	0	0	0	1	0	1	0	1	0	1	0	1	0	0	0	0	0	1	0
737	sp|P04424|ARLY_HUMAN	sp|P04424|ARLY_HUMAN Argininosuccinate lyase OS=Homo sapiens GN=ASL PE=1 SV=4	51910.41	0	0	0	1	1	1	0	1	0	0	1	0	0	0	0	0	0	1	1	1	0	1	0	0	1	0	0	0	0	0	0	1	1	1	0	1	0	0	1	0	0	0
738	sp|Q8N163|CCAR2_HUMAN	sp|Q8N163|CCAR2_HUMAN Cell cycle and apoptosis regulator protein 2 OS=Homo sapiens GN=CCAR2 PE=1 SV=2	103465.01	0	0	1	0	1	0	0	0	1	0	1	0	1	0	0	0	1	0	1	0	0	0	1	0	1	0	1	0	0	0	1	0	1	0	0	0	1	0	1	0	1	0
739	sp|O75367|H2AY_HUMAN	sp|O75367|H2AY_HUMAN Core histone macro-H2A.1 OS=Homo sapiens GN=H2AFY PE=1 SV=4	39763.53	0	0	0	0	0	1	1	1	0	1	0	0	0	1	0	0	0	0	0	1	1	1	0	1	0	0	0	1	0	0	0	0	0	1	1	1	0	1	0	0	0	1
740	sp|Q9P0L0|VAPA_HUMAN	sp|Q9P0L0|VAPA_HUMAN Vesicle-associated membrane protein-associated protein A OS=Homo sapiens GN=VAPA PE=1 SV=3	28103.3	0	1	0	0	0	1	0	1	0	0	0	0	1	1	0	1	0	0	0	1	0	1	0	0	0	0	1	1	0	1	0	0	0	1	0	1	0	0	0	0	1	1
741	sp|Q14677|EPN4_HUMAN	sp|Q14677|EPN4_HUMAN Clathrin interactor 1 OS=Homo sapiens GN=CLINT1 PE=1 SV=1	68272.82	0	1	0	1	1	0	0	1	0	0	0	0	0	1	0	1	0	1	1	0	0	1	0	0	0	0	0	1	0	1	0	1	1	0	0	1	0	0	0	0	0	1
742	sp|P15170|ERF3A_HUMAN	sp|P15170|ERF3A_HUMAN Eukaryotic peptide chain release factor GTP-binding subunit ERF3A OS=Homo sapiens GN=GSPT1 PE=1 SV=1	56347.53	0	0	2	1	0	0	1	1	0	0	1	1	0	0	0	0	2	1	0	0	1	1	0	0	1	1	0	0	0	0	2	1	0	0	1	1	0	0	1	1	0	0
743	sp|Q8TD17|ZN398_HUMAN	sp|Q8TD17|ZN398_HUMAN Zinc finger protein 398 OS=Homo sapiens GN=ZNF398 PE=1 SV=1	72577.44	1	1	0	1	0	1	0	0	0	0	0	0	0	1	1	1	0	1	0	1	0	0	0	0	0	0	0	1	1	1	0	1	0	1	0	0	0	0	0	0	0	1
744	sp|P49189|AL9A1_HUMAN	sp|P49189|AL9A1_HUMAN 4-trimethylaminobutyraldehyde dehydrogenase OS=Homo sapiens GN=ALDH9A1 PE=1 SV=3	54679.33	1	0	1	0	1	0	0	0	1	0	1	0	0	0	1	0	1	0	1	0	0	0	1	0	1	0	0	0	1	0	1	0	1	0	0	0	1	0	1	0	0	0
745	sp|O75348|VATG1_HUMAN	sp|O75348|VATG1_HUMAN V-type proton ATPase subunit G 1 OS=Homo sapiens GN=ATP6V1G1 PE=1 SV=3	13863.13	0	1	0	1	0	1	0	0	0	0	0	1	0	1	0	1	0	1	0	1	0	0	0	0	0	1	0	1	0	1	0	1	0	1	0	0	0	0	0	1	0	1
746	sp|P09525|ANXA4_HUMAN	sp|P09525|ANXA4_HUMAN Annexin A4 OS=Homo sapiens GN=ANXA4 PE=1 SV=4	36088.21	0	1	0	1	0	0	0	1	0	1	0	0	0	1	0	1	0	1	0	0	0	1	0	1	0	0	0	1	0	1	0	1	0	0	0	1	0	1	0	0	0	1
747	sp|P05783|K1C18_HUMAN	sp|P05783|K1C18_HUMAN Keratin, type I cytoskeletal 18 OS=Homo sapiens GN=KRT18 PE=1 SV=2	48028.54	1	0	1	0	0	0	0	0	1	0	1	0	0	1	1	0	1	0	0	0	0	0	1	0	1	0	0	1	1	0	1	0	0	0	0	0	1	0	1	0	0	1
748	sp|P80723|BASP1_HUMAN	sp|P80723|BASP1_HUMAN Brain acid soluble protein 1 OS=Homo sapiens GN=BASP1 PE=1 SV=2	22680.01	0	1	0	0	1	0	0	0	0	0	0	1	0	2	0	1	0	0	1	0	0	0	0	0	0	1	0	2	0	1	0	0	1	0	0	0	0	0	0	1	0	2
749	sp|P63241|IF5A1_HUMAN	sp|P63241|IF5A1_HUMAN Eukaryotic translation initiation factor 5A-1 OS=Homo sapiens GN=EIF5A PE=1 SV=2	17049.49	0	0	0	0	1	0	1	0	0	0	1	0	1	0	0	0	0	0	1	0	1	0	0	0	1	0	1	0	0	0	0	0	1	0	1	0	0	0	1	0	1	0
750	sp|B0FP48|UPK3L_HUMAN	sp|B0FP48|UPK3L_HUMAN Uroplakin-3b-like protein OS=Homo sapiens GN=UPK3BL PE=2 SV=1	28595.88	0	0	0	1	0	0	0	1	0	0	0	1	0	1	0	0	0	1	0	0	0	1	0	0	0	1	0	1	0	0	0	1	0	0	0	1	0	0	0	1	0	1
751	sp|P62491|RB11A_HUMAN	sp|P62491|RB11A_HUMAN Ras-related protein Rab-11A OS=Homo sapiens GN=RAB11A PE=1 SV=3	24492.46	0	0	0	0	1	0	0	1	1	0	1	2	1	0	0	0	0	0	1	0	0	1	1	0	1	2	1	0	0	0	0	0	1	0	0	1	1	0	1	2	1	0
752	sp|Q7RTR2|NLRC3_HUMAN	sp|Q7RTR2|NLRC3_HUMAN Protein NLRC3 OS=Homo sapiens GN=NLRC3 PE=2 SV=2	115897.01	1	1	1	0	0	0	0	0	1	0	0	0	0	0	1	1	1	0	0	0	0	0	1	0	0	0	0	0	1	1	1	0	0	0	0	0	1	0	0	0	0	0
753	sp|O60613|SEP15_HUMAN	sp|O60613|SEP15_HUMAN 15 kDa selenoprotein OS=Homo sapiens GN=SEP15 PE=1 SV=3	18236.12	0	0	1	0	0	0	0	1	1	1	0	0	0	0	0	0	1	0	0	0	0	1	1	1	0	0	0	0	0	0	1	0	0	0	0	1	1	1	0	0	0	0
754	sp|Q9H3Z4|DNJC5_HUMAN	sp|Q9H3Z4|DNJC5_HUMAN DnaJ homolog subfamily C member 5 OS=Homo sapiens GN=DNAJC5 PE=1 SV=1	22932.63	1	0	0	0	0	2	0	0	0	1	0	0	0	0	1	0	0	0	0	2	0	0	0	1	0	0	0	0	1	0	0	0	0	2	0	0	0	1	0	0	0	0
755	sp|P62269|RS18_HUMAN	sp|P62269|RS18_HUMAN 40S ribosomal protein S18 OS=Homo sapiens GN=RPS18 PE=1 SV=3	17707.86	0	0	1	0	0	0	1	0	0	0	0	0	0	2	0	0	1	0	0	0	1	0	0	0	0	0	0	2	0	0	1	0	0	0	1	0	0	0	0	0	0	2
756	sp|Q9UBQ7|GRHPR_HUMAN	sp|Q9UBQ7|GRHPR_HUMAN Glyoxylate reductase/hydroxypyruvate reductase OS=Homo sapiens GN=GRHPR PE=1 SV=1	36044.89	0	0	0	0	0	0	1	1	0	1	0	1	0	0	0	0	0	0	0	0	1	1	0	1	0	1	0	0	0	0	0	0	0	0	1	1	0	1	0	1	0	0
757	sp|Q9NUV7|SPTC3_HUMAN	sp|Q9NUV7|SPTC3_HUMAN Serine palmitoyltransferase 3 OS=Homo sapiens GN=SPTLC3 PE=1 SV=3	62351.9	1	0	1	0	0	0	1	0	1	0	0	0	0	0	1	0	1	0	0	0	1	0	1	0	0	0	0	0	1	0	1	0	0	0	1	0	1	0	0	0	0	0
758	sp|Q99733|NP1L4_HUMAN	sp|Q99733|NP1L4_HUMAN Nucleosome assembly protein 1-like 4 OS=Homo sapiens GN=NAP1L4 PE=1 SV=1	42967.95	0	1	0	0	0	1	0	0	0	1	0	1	0	0	0	1	0	0	0	1	0	0	0	1	0	1	0	0	0	1	0	0	0	1	0	0	0	1	0	1	0	0
759	sp|P35222|CTNB1_HUMAN	sp|P35222|CTNB1_HUMAN Catenin beta-1 OS=Homo sapiens GN=CTNNB1 PE=1 SV=1	86069.45	0	0	1	0	0	0	0	0	1	0	0	0	1	1	0	0	1	0	0	0	0	0	1	0	0	0	1	1	0	0	1	0	0	0	0	0	1	0	0	0	1	1
760	sp|Q9NTK5|OLA1_HUMAN	sp|Q9NTK5|OLA1_HUMAN Obg-like ATPase 1 OS=Homo sapiens GN=OLA1 PE=1 SV=2	44943.38	1	0	0	0	0	0	0	0	0	2	0	0	0	1	1	0	0	0	0	0	0	0	0	2	0	0	0	1	1	0	0	0	0	0	0	0	0	2	0	0	0	1
761	sp|P19652|A1AG2_HUMAN	sp|P19652|A1AG2_HUMAN Alpha-1-acid glycoprotein 2 OS=Homo sapiens GN=ORM2 PE=1 SV=2	23872.74	0	0	0	0	1	0	1	0	1	1	0	0	0	0	0	0	0	0	1	0	1	0	1	1	0	0	0	0	0	0	0	0	1	0	1	0	1	1	0	0	0	0
762	sp|Q10588|BST1_HUMAN	sp|Q10588|BST1_HUMAN ADP-ribosyl cyclase/cyclic ADP-ribose hydrolase 2 OS=Homo sapiens GN=BST1 PE=1 SV=2	36328.31	1	0	0	0	1	0	1	0	1	0	0	0	0	0	1	0	0	0	1	0	1	0	1	0	0	0	0	0	1	0	0	0	1	0	1	0	1	0	0	0	0	0
763	sp|O00505|IMA4_HUMAN	sp|O00505|IMA4_HUMAN Importin subunit alpha-4 OS=Homo sapiens GN=KPNA3 PE=1 SV=2	58288.04	0	0	0	0	0	1	0	0	0	1	0	1	0	1	0	0	0	0	0	1	0	0	0	1	0	1	0	1	0	0	0	0	0	1	0	0	0	1	0	1	0	1
764	sp|P62899|RL31_HUMAN	sp|P62899|RL31_HUMAN 60S ribosomal protein L31 OS=Homo sapiens GN=RPL31 PE=1 SV=1	14453.93	0	1	1	1	0	0	0	0	0	1	0	0	0	0	0	1	1	1	0	0	0	0	0	1	0	0	0	0	0	1	1	1	0	0	0	0	0	1	0	0	0	0
765	sp|P33908|MA1A1_HUMAN	sp|P33908|MA1A1_HUMAN Mannosyl-oligosaccharide 1,2-alpha-mannosidase IA OS=Homo sapiens GN=MAN1A1 PE=1 SV=3	73150.36	0	0	0	0	1	0	1	0	1	0	0	0	1	0	0	0	0	0	1	0	1	0	1	0	0	0	1	0	0	0	0	0	1	0	1	0	1	0	0	0	1	0
766	sp|Q9NQT8|KI13B_HUMAN	sp|Q9NQT8|KI13B_HUMAN Kinesin-like protein KIF13B OS=Homo sapiens GN=KIF13B PE=1 SV=2	203974.07	0	1	0	0	0	1	0	0	0	1	0	1	0	0	0	1	0	0	0	1	0	0	0	1	0	1	0	0	0	1	0	0	0	1	0	0	0	1	0	1	0	0
767	sp|P68402|PA1B2_HUMAN	sp|P68402|PA1B2_HUMAN Platelet-activating factor acetylhydrolase IB subunit beta OS=Homo sapiens GN=PAFAH1B2 PE=1 SV=1	25724.19	0	0	0	0	0	0	1	1	1	1	0	0	0	0	0	0	0	0	0	0	1	1	1	1	0	0	0	0	0	0	0	0	0	0	1	1	1	1	0	0	0	0
768	sp|P22059|OSBP1_HUMAN	sp|P22059|OSBP1_HUMAN Oxysterol-binding protein 1 OS=Homo sapiens GN=OSBP PE=1 SV=1	90219.87	0	0	1	0	1	0	0	0	1	0	1	0	0	0	0	0	1	0	1	0	0	0	1	0	1	0	0	0	0	0	1	0	1	0	0	0	1	0	1	0	0	0
769	sp|Q99426|TBCB_HUMAN	sp|Q99426|TBCB_HUMAN Tubulin-folding cofactor B OS=Homo sapiens GN=TBCB PE=1 SV=2	27593.6	0	0	1	0	1	1	1	0	0	0	0	0	0	0	0	0	1	0	1	1	1	0	0	0	0	0	0	0	0	0	1	0	1	1	1	0	0	0	0	0	0	0
770	sp|Q9Y6D6|BIG1_HUMAN	sp|Q9Y6D6|BIG1_HUMAN Brefeldin A-inhibited guanine nucleotide-exchange protein 1 OS=Homo sapiens GN=ARFGEF1 PE=1 SV=2	210858.33	1	0	1	0	0	0	0	0	0	0	1	0	1	0	1	0	1	0	0	0	0	0	0	0	1	0	1	0	1	0	1	0	0	0	0	0	0	0	1	0	1	0
771	sp|Q9Y4L1|HYOU1_HUMAN	sp|Q9Y4L1|HYOU1_HUMAN Hypoxia up-regulated protein 1 OS=Homo sapiens GN=HYOU1 PE=1 SV=1	111494.29	1	0	0	0	0	0	0	0	1	0	0	1	1	0	1	0	0	0	0	0	0	0	1	0	0	1	1	0	1	0	0	0	0	0	0	0	1	0	0	1	1	0
772	sp|P09110|THIK_HUMAN	sp|P09110|THIK_HUMAN 3-ketoacyl-CoA thiolase, peroxisomal OS=Homo sapiens GN=ACAA1 PE=1 SV=2	44834.07	0	0	0	1	0	0	0	0	0	1	0	1	0	1	0	0	0	1	0	0	0	0	0	1	0	1	0	1	0	0	0	1	0	0	0	0	0	1	0	1	0	1
773	sp|P18124|RL7_HUMAN	sp|P18124|RL7_HUMAN 60S ribosomal protein L7 OS=Homo sapiens GN=RPL7 PE=1 SV=1	29264.22	0	0	0	1	0	0	0	0	0	0	0	2	1	0	0	0	0	1	0	0	0	0	0	0	0	2	1	0	0	0	0	1	0	0	0	0	0	0	0	2	1	0
774	sp|Q9BQE5|APOL2_HUMAN	sp|Q9BQE5|APOL2_HUMAN Apolipoprotein L2 OS=Homo sapiens GN=APOL2 PE=1 SV=1	37126.41	0	0	1	0	0	0	0	0	1	0	0	0	2	0	0	0	1	0	0	0	0	0	1	0	0	0	2	0	0	0	1	0	0	0	0	0	1	0	0	0	2	0
775	sp|P25705|ATPA_HUMAN	sp|P25705|ATPA_HUMAN ATP synthase subunit alpha, mitochondrial OS=Homo sapiens GN=ATP5A1 PE=1 SV=1	59827.64	0	0	0	0	0	0	0	2	0	1	0	0	0	1	0	0	0	0	0	0	0	2	0	1	0	0	0	1	0	0	0	0	0	0	0	2	0	1	0	0	0	1
776	sp|Q9BZQ8|NIBAN_HUMAN	sp|Q9BZQ8|NIBAN_HUMAN Protein Niban OS=Homo sapiens GN=FAM129A PE=1 SV=1	104039.37	0	0	0	0	0	0	1	1	0	0	1	0	1	0	0	0	0	0	0	0	1	1	0	0	1	0	1	0	0	0	0	0	0	0	1	1	0	0	1	0	1	0
777	sp|Q99439|CNN2_HUMAN	sp|Q99439|CNN2_HUMAN Calponin-2 OS=Homo sapiens GN=CNN2 PE=1 SV=4	34074.45	0	1	0	1	0	0	0	1	0	0	0	1	0	0	0	1	0	1	0	0	0	1	0	0	0	1	0	0	0	1	0	1	0	0	0	1	0	0	0	1	0	0
778	sp|P61225|RAP2B_HUMAN	sp|P61225|RAP2B_HUMAN Ras-related protein Rap-2b OS=Homo sapiens GN=RAP2B PE=1 SV=1	20719.29	0	1	0	1	0	0	0	1	0	1	0	0	0	0	0	1	0	1	0	0	0	1	0	1	0	0	0	0	0	1	0	1	0	0	0	1	0	1	0	0	0	0
779	sp|P61019|RAB2A_HUMAN	sp|P61019|RAB2A_HUMAN Ras-related protein Rab-2A OS=Homo sapiens GN=RAB2A PE=1 SV=1	23701.83	0	0	0	1	0	0	0	1	0	0	0	0	1	1	0	0	0	1	0	0	0	1	0	0	0	0	1	1	0	0	0	1	0	0	0	1	0	0	0	0	1	1
780	sp|Q9UI12|VATH_HUMAN	sp|Q9UI12|VATH_HUMAN V-type proton ATPase subunit H OS=Homo sapiens GN=ATP6V1H PE=1 SV=1	56417.28	0	1	0	1	0	0	0	1	0	0	1	0	0	0	0	1	0	1	0	0	0	1	0	0	1	0	0	0	0	1	0	1	0	0	0	1	0	0	1	0	0	0
781	sp|P07741|APT_HUMAN	sp|P07741|APT_HUMAN Adenine phosphoribosyltransferase OS=Homo sapiens GN=APRT PE=1 SV=2	19766.5	0	1	0	0	0	0	0	1	0	1	0	1	0	0	0	1	0	0	0	0	0	1	0	1	0	1	0	0	0	1	0	0	0	0	0	1	0	1	0	1	0	0
782	sp|Q16610|ECM1_HUMAN	sp|Q16610|ECM1_HUMAN Extracellular matrix protein 1 OS=Homo sapiens GN=ECM1 PE=1 SV=2	62231.88	0	0	1	0	0	0	0	0	1	1	0	0	1	0	0	0	1	0	0	0	0	0	1	1	0	0	1	0	0	0	1	0	0	0	0	0	1	1	0	0	1	0
783	sp|Q8IY50|S35F3_HUMAN	sp|Q8IY50|S35F3_HUMAN Putative thiamine transporter SLC35F3 OS=Homo sapiens GN=SLC35F3 PE=2 SV=2	47471.21	0	0	0	0	0	0	0	1	0	2	0	1	0	0	0	0	0	0	0	0	0	1	0	1	0	1	0	0	0	0	0	0	0	0	0	1	0	1	0	1	0	0
784	sp|P43487|RANG_HUMAN	sp|P43487|RANG_HUMAN Ran-specific GTPase-activating protein OS=Homo sapiens GN=RANBP1 PE=1 SV=1	23466.63	1	0	1	0	0	0	0	0	0	0	1	0	1	0	1	0	1	0	0	0	0	0	0	0	1	0	1	0	1	0	1	0	0	0	0	0	0	0	1	0	1	0
785	sp|Q9UM54|MYO6_HUMAN	sp|Q9UM54|MYO6_HUMAN Unconventional myosin-VI OS=Homo sapiens GN=MYO6 PE=1 SV=4	150965.01	0	0	1	0	1	0	1	0	0	0	1	0	0	0	0	0	1	0	1	0	1	0	0	0	1	0	0	0	0	0	1	0	1	0	1	0	0	0	1	0	0	0
786	sp|P42785|PCP_HUMAN	sp|P42785|PCP_HUMAN Lysosomal Pro-X carboxypeptidase OS=Homo sapiens GN=PRCP PE=1 SV=1	56277.11	1	0	0	0	1	0	1	0	0	0	1	0	0	0	1	0	0	0	1	0	1	0	0	0	1	0	0	0	1	0	0	0	1	0	1	0	0	0	1	0	0	0
787	sp|O43143|DHX15_HUMAN	sp|O43143|DHX15_HUMAN Pre-mRNA-splicing factor ATP-dependent RNA helicase DHX15 OS=Homo sapiens GN=DHX15 PE=1 SV=2	91673.47	0	0	0	0	1	0	1	0	0	0	1	0	1	0	0	0	0	0	1	0	1	0	0	0	1	0	1	0	0	0	0	0	1	0	1	0	0	0	1	0	1	0
788	sp|P01019|ANGT_HUMAN	sp|P01019|ANGT_HUMAN Angiotensinogen OS=Homo sapiens GN=AGT PE=1 SV=1	53405.62	1	0	0	0	1	0	0	0	1	0	0	0	1	0	1	0	0	0	1	0	0	0	1	0	0	0	1	0	1	0	0	0	1	0	0	0	1	0	0	0	1	0
789	sp|P12955|PEPD_HUMAN	sp|P12955|PEPD_HUMAN Xaa-Pro dipeptidase OS=Homo sapiens GN=PEPD PE=1 SV=3	55311.21	0	0	1	0	0	0	1	0	1	0	0	0	1	0	0	0	1	0	0	0	1	0	1	0	0	0	1	0	0	0	1	0	0	0	1	0	1	0	0	0	1	0
790	sp|Q9NSD9|SYFB_HUMAN	sp|Q9NSD9|SYFB_HUMAN Phenylalanine--tRNA ligase beta subunit OS=Homo sapiens GN=FARSB PE=1 SV=3	66700.78	0	1	0	1	0	0	0	0	0	1	0	0	0	1	0	1	0	1	0	0	0	0	0	1	0	0	0	1	0	1	0	1	0	0	0	0	0	1	0	0	0	1
791	sp|P23142|FBLN1_HUMAN	sp|P23142|FBLN1_HUMAN Fibulin-1 OS=Homo sapiens GN=FBLN1 PE=1 SV=4	81267.9	1	0	0	0	1	0	1	0	0	0	1	0	0	0	1	0	0	0	1	0	1	0	0	0	1	0	0	0	1	0	0	0	1	0	1	0	0	0	1	0	0	0
792	sp|O75556|SG2A1_HUMAN	sp|O75556|SG2A1_HUMAN Mammaglobin-B OS=Homo sapiens GN=SCGB2A1 PE=1 SV=1	11104.39	0	1	0	1	0	1	0	0	0	1	0	0	0	0	0	1	0	1	0	1	0	0	0	1	0	0	0	0	0	1	0	1	0	1	0	0	0	1	0	0	0	0
793	sp|Q92747|ARC1A_HUMAN	sp|Q92747|ARC1A_HUMAN Actin-related protein 2/3 complex subunit 1A OS=Homo sapiens GN=ARPC1A PE=1 SV=2	42112.9	0	0	0	0	0	1	0	1	0	0	0	1	0	1	0	0	0	0	0	1	0	1	0	0	0	1	0	1	0	0	0	0	0	1	0	1	0	0	0	1	0	1
794	sp|P12268|IMDH2_HUMAN	sp|P12268|IMDH2_HUMAN Inosine-5'-monophosphate dehydrogenase 2 OS=Homo sapiens GN=IMPDH2 PE=1 SV=2	56225.82	0	1	0	0	0	1	0	1	0	1	0	0	0	0	0	1	0	0	0	1	0	1	0	1	0	0	0	0	0	1	0	0	0	1	0	1	0	1	0	0	0	0
795	sp|Q8NBQ5|DHB11_HUMAN	sp|Q8NBQ5|DHB11_HUMAN Estradiol 17-beta-dehydrogenase 11 OS=Homo sapiens GN=HSD17B11 PE=1 SV=3	33256.86	0	0	0	0	0	0	0	1	0	0	0	1	0	1	0	0	0	0	0	0	0	1	0	0	0	1	0	1	0	0	0	0	0	0	0	1	0	0	0	1	0	1
796	sp|Q96QA5|GSDMA_HUMAN	sp|Q96QA5|GSDMA_HUMAN Gasdermin-A OS=Homo sapiens GN=GSDMA PE=1 SV=4	49618.93	0	1	0	1	0	1	0	0	0	0	0	0	0	0	0	1	0	1	0	1	0	0	0	0	0	0	0	0	0	1	0	1	0	1	0	0	0	0	0	0	0	0
797	sp|P07910|HNRPC_HUMAN	sp|P07910|HNRPC_HUMAN Heterogeneous nuclear ribonucleoproteins C1/C2 OS=Homo sapiens GN=HNRNPC PE=1 SV=4	33706.56	0	0	0	0	0	0	1	0	0	0	0	1	0	1	0	0	0	0	0	0	1	0	0	0	0	1	0	1	0	0	0	0	0	0	1	0	0	0	0	1	0	1
798	sp|Q09028|RBBP4_HUMAN	sp|Q09028|RBBP4_HUMAN Histone-binding protein RBBP4 OS=Homo sapiens GN=RBBP4 PE=1 SV=3	47911.18	0	0	0	0	0	1	0	1	0	0	0	1	0	0	0	0	0	0	0	1	0	1	0	0	0	1	0	0	0	0	0	0	0	1	0	1	0	0	0	1	0	0
799	sp|P04229|2B11_HUMAN	sp|P04229|2B11_HUMAN HLA class II histocompatibility antigen, DRB1-1 beta chain OS=Homo sapiens GN=HLA-DRB1 PE=1 SV=2	30294.19	1	0	1	0	0	0	0	0	1	0	0	0	0	0	1	0	1	0	0	0	0	0	1	0	0	0	0	0	1	0	1	0	0	0	0	0	1	0	0	0	0	0
800	sp|P23141|EST1_HUMAN	sp|P23141|EST1_HUMAN Liver carboxylesterase 1 OS=Homo sapiens GN=CES1 PE=1 SV=2	62766.26	0	0	1	0	1	0	0	0	1	0	0	0	0	0	0	0	1	0	1	0	0	0	1	0	0	0	0	0	0	0	1	0	1	0	0	0	1	0	0	0	0	0
801	sp|P49441|INPP_HUMAN	sp|P49441|INPP_HUMAN Inositol polyphosphate 1-phosphatase OS=Homo sapiens GN=INPP1 PE=1 SV=1	44540.46	0	0	0	0	0	0	0	1	0	1	0	1	0	0	0	0	0	0	0	0	0	1	0	1	0	1	0	0	0	0	0	0	0	0	0	1	0	1	0	1	0	0
802	sp|O95336|6PGL_HUMAN	sp|O95336|6PGL_HUMAN 6-phosphogluconolactonase OS=Homo sapiens GN=PGLS PE=1 SV=2	27814.66	0	0	0	1	0	1	1	0	0	0	0	0	0	0	0	0	0	1	0	1	1	0	0	0	0	0	0	0	0	0	0	1	0	1	1	0	0	0	0	0	0	0
803	sp|P67775|PP2AA_HUMAN	sp|P67775|PP2AA_HUMAN Serine/threonine-protein phosphatase 2A catalytic subunit alpha isoform OS=Homo sapiens GN=PPP2CA PE=1 SV=1	36141.61	1	0	0	1	0	0	0	0	0	0	1	0	0	0	1	0	0	1	0	0	0	0	0	0	1	0	0	0	1	0	0	1	0	0	0	0	0	0	1	0	0	0
804	sp|Q5SSJ5|HP1B3_HUMAN	sp|Q5SSJ5|HP1B3_HUMAN Heterochromatin protein 1-binding protein 3 OS=Homo sapiens GN=HP1BP3 PE=1 SV=1	61454.38	0	1	0	0	0	0	0	0	0	2	0	0	0	0	0	1	0	0	0	0	0	0	0	2	0	0	0	0	0	1	0	0	0	0	0	0	0	2	0	0	0	0
805	sp|P62942|FKB1A_HUMAN	sp|P62942|FKB1A_HUMAN Peptidyl-prolyl cis-trans isomerase FKBP1A OS=Homo sapiens GN=FKBP1A PE=1 SV=2	12000.11	0	0	0	0	0	0	1	0	0	0	1	0	1	0	0	0	0	0	0	0	1	0	0	0	1	0	1	0	0	0	0	0	0	0	1	0	0	0	1	0	1	0
806	sp|P52788|SPSY_HUMAN	sp|P52788|SPSY_HUMAN Spermine synthase OS=Homo sapiens GN=SMS PE=1 SV=2	41697.96	0	0	1	0	0	0	1	0	0	0	1	0	0	0	0	0	1	0	0	0	1	0	0	0	1	0	0	0	0	0	1	0	0	0	1	0	0	0	1	0	0	0
807	sp|Q16222|UAP1_HUMAN	sp|Q16222|UAP1_HUMAN UDP-N-acetylhexosamine pyrophosphorylase OS=Homo sapiens GN=UAP1 PE=1 SV=3	59131.0	0	0	0	0	0	0	1	0	1	0	0	0	1	0	0	0	0	0	0	0	1	0	1	0	0	0	1	0	0	0	0	0	0	0	1	0	1	0	0	0	1	0
808	sp|P36542|ATPG_HUMAN	sp|P36542|ATPG_HUMAN ATP synthase subunit gamma, mitochondrial OS=Homo sapiens GN=ATP5C1 PE=1 SV=1	33032.29	0	0	0	0	1	0	0	0	1	0	0	1	0	0	0	0	0	0	1	0	0	0	1	0	0	1	0	0	0	0	0	0	1	0	0	0	1	0	0	1	0	0
809	sp|Q13586|STIM1_HUMAN	sp|Q13586|STIM1_HUMAN Stromal interaction molecule 1 OS=Homo sapiens GN=STIM1 PE=1 SV=3	77660.4	0	0	0	1	0	0	0	0	0	0	0	1	0	1	0	0	0	1	0	0	0	0	0	0	0	1	0	1	0	0	0	1	0	0	0	0	0	0	0	1	0	1
810	sp|Q01581|HMCS1_HUMAN	sp|Q01581|HMCS1_HUMAN Hydroxymethylglutaryl-CoA synthase, cytoplasmic OS=Homo sapiens GN=HMGCS1 PE=1 SV=2	57827.57	0	1	0	0	0	0	0	0	0	1	0	0	0	1	0	1	0	0	0	0	0	0	0	1	0	0	0	1	0	1	0	0	0	0	0	0	0	1	0	0	0	1
811	sp|P26373|RL13_HUMAN	sp|P26373|RL13_HUMAN 60S ribosomal protein L13 OS=Homo sapiens GN=RPL13 PE=1 SV=4	24303.55	0	1	0	0	0	0	0	0	0	0	0	1	0	1	0	1	0	0	0	0	0	0	0	0	0	1	0	1	0	1	0	0	0	0	0	0	0	0	0	1	0	1
812	sp|Q13011|ECH1_HUMAN	sp|Q13011|ECH1_HUMAN Delta(3,5)-Delta(2,4)-dienoyl-CoA isomerase, mitochondrial OS=Homo sapiens GN=ECH1 PE=1 SV=2	36135.51	0	0	1	0	0	0	1	0	1	0	0	0	0	0	0	0	1	0	0	0	1	0	1	0	0	0	0	0	0	0	1	0	0	0	1	0	1	0	0	0	0	0
813	sp|O60506|HNRPQ_HUMAN	sp|O60506|HNRPQ_HUMAN Heterogeneous nuclear ribonucleoprotein Q OS=Homo sapiens GN=SYNCRIP PE=1 SV=2	69787.68	0	0	1	0	0	0	0	1	0	0	0	1	0	0	0	0	1	0	0	0	0	1	0	0	0	1	0	0	0	0	1	0	0	0	0	1	0	0	0	1	0	0
814	sp|P52294|IMA5_HUMAN	sp|P52294|IMA5_HUMAN Importin subunit alpha-5 OS=Homo sapiens GN=KPNA1 PE=1 SV=3	60924.83	0	0	0	0	0	0	0	0	0	0	1	0	1	1	0	0	0	0	0	0	0	0	0	0	1	0	1	1	0	0	0	0	0	0	0	0	0	0	1	0	1	1
815	sp|P55160|NCKPL_HUMAN	sp|P55160|NCKPL_HUMAN Nck-associated protein 1-like OS=Homo sapiens GN=NCKAP1L PE=1 SV=3	129553.52	0	0	0	1	0	1	0	0	0	0	0	1	0	0	0	0	0	1	0	1	0	0	0	0	0	1	0	0	0	0	0	1	0	1	0	0	0	0	0	1	0	0
816	sp|P52434|RPAB3_HUMAN	sp|P52434|RPAB3_HUMAN DNA-directed RNA polymerases I, II, and III subunit RPABC3 OS=Homo sapiens GN=POLR2H PE=1 SV=4	17189.47	1	1	0	0	0	0	0	1	0	0	0	0	0	0	1	1	0	0	0	0	0	1	0	0	0	0	0	0	1	1	0	0	0	0	0	1	0	0	0	0	0	0
817	sp|O95479|G6PE_HUMAN	sp|O95479|G6PE_HUMAN GDH/6PGL endoplasmic bifunctional protein OS=Homo sapiens GN=H6PD PE=1 SV=2	89406.62	1	0	1	0	0	0	1	0	0	0	0	0	0	0	1	0	1	0	0	0	1	0	0	0	0	0	0	0	1	0	1	0	0	0	1	0	0	0	0	0	0	0
818	sp|P61421|VA0D1_HUMAN	sp|P61421|VA0D1_HUMAN V-type proton ATPase subunit d 1 OS=Homo sapiens GN=ATP6V0D1 PE=1 SV=1	40759.39	0	1	0	1	0	0	0	1	0	0	0	0	0	0	0	1	0	1	0	0	0	1	0	0	0	0	0	0	0	1	0	1	0	0	0	1	0	0	0	0	0	0
819	sp|Q93008|USP9X_HUMAN	sp|Q93008|USP9X_HUMAN Probable ubiquitin carboxyl-terminal hydrolase FAF-X OS=Homo sapiens GN=USP9X PE=1 SV=3	295514.91	0	0	0	0	1	0	1	0	0	0	1	0	0	0	0	0	0	0	1	0	1	0	0	0	1	0	0	0	0	0	0	0	1	0	1	0	0	0	1	0	0	0
820	sp|P26639|SYTC_HUMAN	sp|P26639|SYTC_HUMAN Threonine--tRNA ligase, cytoplasmic OS=Homo sapiens GN=TARS PE=1 SV=3	84294.21	0	0	0	0	0	0	0	1	0	1	0	0	1	0	0	0	0	0	0	0	0	1	0	1	0	0	1	0	0	0	0	0	0	0	0	1	0	1	0	0	1	0
821	sp|P47985|UCRI_HUMAN	sp|P47985|UCRI_HUMAN Cytochrome b-c1 complex subunit Rieske, mitochondrial OS=Homo sapiens GN=UQCRFS1 PE=1 SV=2	29934.47	0	0	1	1	1	0	0	0	0	0	0	0	0	0	0	0	1	1	1	0	0	0	0	0	0	0	0	0	0	0	1	1	1	0	0	0	0	0	0	0	0	0
822	sp|Q9BWD1|THIC_HUMAN	sp|Q9BWD1|THIC_HUMAN Acetyl-CoA acetyltransferase, cytosolic OS=Homo sapiens GN=ACAT2 PE=1 SV=2	41837.58	1	0	0	0	0	0	1	0	1	0	0	0	0	0	1	0	0	0	0	0	1	0	1	0	0	0	0	0	1	0	0	0	0	0	1	0	1	0	0	0	0	0
823	sp|O14949|QCR8_HUMAN	sp|O14949|QCR8_HUMAN Cytochrome b-c1 complex subunit 8 OS=Homo sapiens GN=UQCRQ PE=1 SV=4	9900.12	0	1	0	1	0	0	0	0	0	0	0	0	0	1	0	1	0	1	0	0	0	0	0	0	0	0	0	1	0	1	0	1	0	0	0	0	0	0	0	0	0	1
824	sp|P21741|MK_HUMAN	sp|P21741|MK_HUMAN Midkine OS=Homo sapiens GN=MDK PE=1 SV=1	16145.23	0	0	1	0	0	0	0	0	1	1	0	0	0	0	0	0	1	0	0	0	0	0	1	1	0	0	0	0	0	0	1	0	0	0	0	0	1	1	0	0	0	0
825	sp|Q5VW32|BROX_HUMAN	sp|Q5VW32|BROX_HUMAN BRO1 domain-containing protein BROX OS=Homo sapiens GN=BROX PE=1 SV=1	46959.84	0	0	0	0	0	0	0	1	0	0	0	1	0	1	0	0	0	0	0	0	0	1	0	0	0	1	0	1	0	0	0	0	0	0	0	1	0	0	0	1	0	1
826	sp|Q99829|CPNE1_HUMAN	sp|Q99829|CPNE1_HUMAN Copine-1 OS=Homo sapiens GN=CPNE1 PE=1 SV=1	59648.78	0	1	0	0	0	1	0	0	0	0	0	0	0	1	0	1	0	0	0	1	0	0	0	0	0	0	0	1	0	1	0	0	0	1	0	0	0	0	0	0	0	1
827	sp|P48729|KC1A_HUMAN	sp|P48729|KC1A_HUMAN Casein kinase I isoform alpha OS=Homo sapiens GN=CSNK1A1 PE=1 SV=2	39117.97	0	1	0	0	0	0	0	0	0	0	0	1	0	1	0	1	0	0	0	0	0	0	0	0	0	1	0	1	0	1	0	0	0	0	0	0	0	0	0	1	0	1
828	sp|O60259|KLK8_HUMAN	sp|O60259|KLK8_HUMAN Kallikrein-8 OS=Homo sapiens GN=KLK8 PE=1 SV=1	28771.0	0	0	0	0	0	1	0	1	0	1	0	0	0	0	0	0	0	0	0	1	0	1	0	1	0	0	0	0	0	0	0	0	0	1	0	1	0	1	0	0	0	0
829	sp|P67809|YBOX1_HUMAN	sp|P67809|YBOX1_HUMAN Nuclease-sensitive element-binding protein 1 OS=Homo sapiens GN=YBX1 PE=1 SV=3	35902.68	1	0	0	0	0	0	0	0	1	0	0	0	0	1	1	0	0	0	0	0	0	0	1	0	0	0	0	1	1	0	0	0	0	0	0	0	1	0	0	0	0	1
830	sp|P04259|K2C6B_HUMAN	sp|P04259|K2C6B_HUMAN Keratin, type II cytoskeletal 6B OS=Homo sapiens GN=KRT6B PE=1 SV=5	60315.4	0	0	0	1	0	0	0	0	0	1	0	1	0	0	0	0	0	1	0	0	0	0	0	1	0	1	0	0	0	0	0	1	0	0	0	0	0	1	0	1	0	0
831	sp|P26006|ITA3_HUMAN	sp|P26006|ITA3_HUMAN Integrin alpha-3 OS=Homo sapiens GN=ITGA3 PE=1 SV=5	117735.46	0	0	0	0	0	0	0	0	0	0	1	0	1	1	0	0	0	0	0	0	0	0	0	0	1	0	1	1	0	0	0	0	0	0	0	0	0	0	1	0	1	1
832	sp|Q7L1Q6|BZW1_HUMAN	sp|Q7L1Q6|BZW1_HUMAN Basic leucine zipper and W2 domain-containing protein 1 OS=Homo sapiens GN=BZW1 PE=1 SV=1	48183.81	1	1	0	0	0	0	0	0	0	0	1	0	0	0	1	1	0	0	0	0	0	0	0	0	1	0	0	0	1	1	0	0	0	0	0	0	0	0	1	0	0	0
833	sp|P46108|CRK_HUMAN	sp|P46108|CRK_HUMAN Adapter molecule crk OS=Homo sapiens GN=CRK PE=1 SV=2	33867.04	0	0	0	1	0	0	0	0	0	1	0	1	0	0	0	0	0	1	0	0	0	0	0	1	0	1	0	0	0	0	0	1	0	0	0	0	0	1	0	1	0	0
834	sp|O60313|OPA1_HUMAN	sp|O60313|OPA1_HUMAN Dynamin-like 120 kDa protein, mitochondrial OS=Homo sapiens GN=OPA1 PE=1 SV=3	112131.03	0	0	1	0	0	0	0	0	0	0	1	1	0	0	0	0	1	0	0	0	0	0	0	0	1	1	0	0	0	0	1	0	0	0	0	0	0	0	1	1	0	0
835	sp|P16070|CD44_HUMAN	sp|P16070|CD44_HUMAN CD44 antigen OS=Homo sapiens GN=CD44 PE=1 SV=3	82000.62	0	1	0	0	0	1	0	0	0	0	0	0	1	0	0	1	0	0	0	1	0	0	0	0	0	0	1	0	0	1	0	0	0	1	0	0	0	0	0	0	1	0
836	sp|P49720|PSB3_HUMAN	sp|P49720|PSB3_HUMAN Proteasome subunit beta type-3 OS=Homo sapiens GN=PSMB3 PE=1 SV=2	23218.56	0	1	0	0	0	0	0	0	0	1	0	0	0	1	0	1	0	0	0	0	0	0	0	1	0	0	0	1	0	1	0	0	0	0	0	0	0	1	0	0	0	1
837	sp|P07686|HEXB_HUMAN	sp|P07686|HEXB_HUMAN Beta-hexosaminidase subunit beta OS=Homo sapiens GN=HEXB PE=1 SV=3	63527.35	1	0	0	0	0	0	0	0	1	0	0	0	1	0	1	0	0	0	0	0	0	0	1	0	0	0	1	0	1	0	0	0	0	0	0	0	1	0	0	0	1	0
838	sp|P40429|RL13A_HUMAN	sp|P40429|RL13A_HUMAN 60S ribosomal protein L13a OS=Homo sapiens GN=RPL13A PE=1 SV=2	23619.4	0	0	0	0	0	0	0	1	0	0	0	1	0	1	0	0	0	0	0	0	0	1	0	0	0	1	0	1	0	0	0	0	0	0	0	1	0	0	0	1	0	1
839	sp|P17844|DDX5_HUMAN	sp|P17844|DDX5_HUMAN Probable ATP-dependent RNA helicase DDX5 OS=Homo sapiens GN=DDX5 PE=1 SV=1	69617.93	0	0	0	0	0	0	0	1	0	1	0	1	0	0	0	0	0	0	0	0	0	1	0	1	0	1	0	0	0	0	0	0	0	0	0	1	0	1	0	1	0	0
840	sp|Q53GQ0|DHB12_HUMAN	sp|Q53GQ0|DHB12_HUMAN Very-long-chain 3-oxoacyl-CoA reductase OS=Homo sapiens GN=HSD17B12 PE=1 SV=2	34416.23	0	1	0	0	0	0	0	1	0	0	0	1	0	0	0	1	0	0	0	0	0	1	0	0	0	1	0	0	0	1	0	0	0	0	0	1	0	0	0	1	0	0
841	sp|P25024|CXCR1_HUMAN	sp|P25024|CXCR1_HUMAN C-X-C chemokine receptor type 1 OS=Homo sapiens GN=CXCR1 PE=1 SV=2	40335.07	0	1	0	0	0	0	0	0	0	1	0	1	0	0	0	1	0	0	0	0	0	0	0	1	0	1	0	0	0	1	0	0	0	0	0	0	0	1	0	1	0	0
842	sp|Q92743|HTRA1_HUMAN	sp|Q92743|HTRA1_HUMAN Serine protease HTRA1 OS=Homo sapiens GN=HTRA1 PE=1 SV=1	52166.96	0	0	0	0	0	1	0	0	0	1	0	1	0	0	0	0	0	0	0	1	0	0	0	1	0	1	0	0	0	0	0	0	0	1	0	0	0	1	0	1	0	0
843	sp|O14727|APAF_HUMAN	sp|O14727|APAF_HUMAN Apoptotic protease-activating factor 1 OS=Homo sapiens GN=APAF1 PE=1 SV=2	144086.89	0	0	0	1	0	0	0	1	0	0	0	1	0	0	0	0	0	1	0	0	0	1	0	0	0	1	0	0	0	0	0	1	0	0	0	1	0	0	0	1	0	0
844	sp|O00233|PSMD9_HUMAN	sp|O00233|PSMD9_HUMAN 26S proteasome non-ATPase regulatory subunit 9 OS=Homo sapiens GN=PSMD9 PE=1 SV=3	24837.57	0	0	0	0	0	0	0	0	0	0	1	0	1	1	0	0	0	0	0	0	0	0	0	0	1	0	1	1	0	0	0	0	0	0	0	0	0	0	1	0	1	1
845	sp|P62495|ERF1_HUMAN	sp|P62495|ERF1_HUMAN Eukaryotic peptide chain release factor subunit 1 OS=Homo sapiens GN=ETF1 PE=1 SV=3	49228.24	0	0	0	0	0	0	0	0	0	1	1	1	0	0	0	0	0	0	0	0	0	0	0	1	1	1	0	0	0	0	0	0	0	0	0	0	0	1	1	1	0	0
846	sp|P51149|RAB7A_HUMAN	sp|P51149|RAB7A_HUMAN Ras-related protein Rab-7a OS=Homo sapiens GN=RAB7A PE=1 SV=1	23759.95	0	1	0	0	0	2	0	0	0	0	0	0	0	0	0	1	0	0	0	1	0	0	0	0	0	0	0	0	0	1	0	0	0	1	0	0	0	0	0	0	0	0
847	sp|P49448|DHE4_HUMAN	sp|P49448|DHE4_HUMAN Glutamate dehydrogenase 2, mitochondrial OS=Homo sapiens GN=GLUD2 PE=1 SV=2	61737.56	1	0	1	0	1	0	0	0	0	0	0	0	1	0	1	0	1	0	1	0	0	0	0	0	0	0	1	0	1	0	1	0	1	0	0	0	0	0	0	0	1	0
848	sp|Q12792|TWF1_HUMAN	sp|Q12792|TWF1_HUMAN Twinfilin-1 OS=Homo sapiens GN=TWF1 PE=1 SV=3	40428.74	0	1	0	1	0	0	0	0	0	1	0	0	0	0	0	1	0	1	0	0	0	0	0	1	0	0	0	0	0	1	0	1	0	0	0	0	0	1	0	0	0	0
849	sp|Q92504|S39A7_HUMAN	sp|Q92504|S39A7_HUMAN Zinc transporter SLC39A7 OS=Homo sapiens GN=SLC39A7 PE=1 SV=2	50201.36	0	1	0	0	0	0	0	1	0	0	0	0	0	1	0	1	0	0	0	0	0	1	0	0	0	0	0	1	0	1	0	0	0	0	0	1	0	0	0	0	0	1
850	sp|Q5HYK3|COQ5_HUMAN	sp|Q5HYK3|COQ5_HUMAN 2-methoxy-6-polyprenyl-1,4-benzoquinol methylase, mitochondrial OS=Homo sapiens GN=COQ5 PE=1 SV=2	37401.94	1	0	0	0	0	0	0	0	0	0	1	1	0	0	1	0	0	0	0	0	0	0	0	0	1	1	0	0	1	0	0	0	0	0	0	0	0	0	1	1	0	0
851	sp|Q9NZM1|MYOF_HUMAN	sp|Q9NZM1|MYOF_HUMAN Myoferlin OS=Homo sapiens GN=MYOF PE=1 SV=1	236100.18	0	0	0	0	0	0	1	0	1	0	0	0	1	0	0	0	0	0	0	0	1	0	1	0	0	0	1	0	0	0	0	0	0	0	1	0	1	0	0	0	1	0
852	sp|Q9Y224|CN166_HUMAN	sp|Q9Y224|CN166_HUMAN UPF0568 protein C14orf166 OS=Homo sapiens GN=C14orf166 PE=1 SV=1	28164.75	0	0	0	0	0	0	0	1	0	1	1	0	0	0	0	0	0	0	0	0	0	1	0	1	1	0	0	0	0	0	0	0	0	0	0	1	0	1	1	0	0	0
853	sp|Q14166|TTL12_HUMAN	sp|Q14166|TTL12_HUMAN Tubulin--tyrosine ligase-like protein 12 OS=Homo sapiens GN=TTLL12 PE=1 SV=2	75154.34	0	0	1	0	1	0	0	0	0	0	1	0	0	0	0	0	1	0	1	0	0	0	0	0	1	0	0	0	0	0	1	0	1	0	0	0	0	0	1	0	0	0
854	sp|P53621|COPA_HUMAN	sp|P53621|COPA_HUMAN Coatomer subunit alpha OS=Homo sapiens GN=COPA PE=1 SV=2	139797.47	1	0	1	0	0	0	1	0	0	0	0	0	0	0	1	0	1	0	0	0	1	0	0	0	0	0	0	0	1	0	1	0	0	0	1	0	0	0	0	0	0	0
855	sp|Q9H3K6|BOLA2_HUMAN	sp|Q9H3K6|BOLA2_HUMAN BolA-like protein 2 OS=Homo sapiens GN=BOLA2 PE=1 SV=1	10281.24	0	0	0	1	0	1	0	0	0	0	0	0	0	1	0	0	0	1	0	1	0	0	0	0	0	0	0	1	0	0	0	1	0	1	0	0	0	0	0	0	0	1
856	sp|P68036|UB2L3_HUMAN	sp|P68036|UB2L3_HUMAN Ubiquitin-conjugating enzyme E2 L3 OS=Homo sapiens GN=UBE2L3 PE=1 SV=1	18021.3	1	0	0	0	0	0	0	0	0	0	1	1	0	0	1	0	0	0	0	0	0	0	0	0	1	1	0	0	1	0	0	0	0	0	0	0	0	0	1	1	0	0
857	sp|P12277|KCRB_HUMAN	sp|P12277|KCRB_HUMAN Creatine kinase B-type OS=Homo sapiens GN=CKB PE=1 SV=1	42902.43	0	0	0	0	1	1	0	0	0	0	0	0	1	0	0	0	0	0	1	1	0	0	0	0	0	0	1	0	0	0	0	0	1	1	0	0	0	0	0	0	1	0
858	sp|Q8IZ83|A16A1_HUMAN	sp|Q8IZ83|A16A1_HUMAN Aldehyde dehydrogenase family 16 member A1 OS=Homo sapiens GN=ALDH16A1 PE=1 SV=2	86100.09	0	0	1	1	0	0	0	0	0	0	1	0	0	0	0	0	1	1	0	0	0	0	0	0	1	0	0	0	0	0	1	1	0	0	0	0	0	0	1	0	0	0
859	sp|Q9UL52|TM11E_HUMAN	sp|Q9UL52|TM11E_HUMAN Transmembrane protease serine 11E OS=Homo sapiens GN=TMPRSS11E PE=1 SV=2	48349.34	0	0	0	1	0	1	0	0	0	0	0	0	0	1	0	0	0	1	0	1	0	0	0	0	0	0	0	1	0	0	0	1	0	1	0	0	0	0	0	0	0	1
860	sp|P10643|CO7_HUMAN	sp|P10643|CO7_HUMAN Complement component C7 OS=Homo sapiens GN=C7 PE=1 SV=2	96650.49	0	0	0	0	1	0	0	0	0	0	1	1	0	0	0	0	0	0	1	0	0	0	0	0	1	1	0	0	0	0	0	0	1	0	0	0	0	0	1	1	0	0
861	sp|P18077|RL35A_HUMAN	sp|P18077|RL35A_HUMAN 60S ribosomal protein L35a OS=Homo sapiens GN=RPL35A PE=1 SV=2	12586.79	0	0	0	1	0	0	0	1	0	0	0	0	0	0	0	0	0	1	0	0	0	1	0	0	0	0	0	0	0	0	0	1	0	0	0	1	0	0	0	0	0	0
862	sp|P32455|GBP1_HUMAN	sp|P32455|GBP1_HUMAN Guanylate-binding protein 1 OS=Homo sapiens GN=GBP1 PE=1 SV=2	68400.91	0	0	0	0	1	0	0	0	0	0	0	0	1	0	0	0	0	0	1	0	0	0	0	0	0	0	1	0	0	0	0	0	1	0	0	0	0	0	0	0	1	0
863	sp|O75363|BCAS1_HUMAN	sp|O75363|BCAS1_HUMAN Breast carcinoma-amplified sequence 1 OS=Homo sapiens GN=BCAS1 PE=1 SV=2	61956.58	0	0	1	0	0	0	1	0	0	0	0	0	0	0	0	0	1	0	0	0	1	0	0	0	0	0	0	0	0	0	1	0	0	0	1	0	0	0	0	0	0	0
864	sp|Q13838|DX39B_HUMAN	sp|Q13838|DX39B_HUMAN Spliceosome RNA helicase DDX39B OS=Homo sapiens GN=DDX39B PE=1 SV=1	49416.11	0	0	0	1	0	0	1	0	0	0	0	0	0	1	0	0	0	1	0	0	1	0	0	0	0	0	0	1	0	0	0	1	0	0	1	0	0	0	0	0	0	1
865	sp|P27701|CD82_HUMAN	sp|P27701|CD82_HUMAN CD82 antigen OS=Homo sapiens GN=CD82 PE=1 SV=1	30233.04	0	0	1	0	0	0	1	0	0	0	0	0	0	0	0	0	1	0	0	0	1	0	0	0	0	0	0	0	0	0	1	0	0	0	1	0	0	0	0	0	0	0
866	sp|P08185|CBG_HUMAN	sp|P08185|CBG_HUMAN Corticosteroid-binding globulin OS=Homo sapiens GN=SERPINA6 PE=1 SV=1	45282.97	0	0	1	0	0	0	0	0	0	0	1	0	0	0	0	0	1	0	0	0	0	0	0	0	1	0	0	0	0	0	1	0	0	0	0	0	0	0	1	0	0	0
867	sp|P30273|FCERG_HUMAN	sp|P30273|FCERG_HUMAN High affinity immunoglobulin epsilon receptor subunit gamma OS=Homo sapiens GN=FCER1G PE=1 SV=1	9775.33	0	0	0	1	0	0	0	0	0	0	0	1	0	0	0	0	0	1	0	0	0	0	0	0	0	1	0	0	0	0	0	1	0	0	0	0	0	0	0	1	0	0
868	sp|P08582|TRFM_HUMAN	sp|P08582|TRFM_HUMAN Melanotransferrin OS=Homo sapiens GN=MELTF PE=1 SV=2	81759.91	0	0	0	0	0	0	0	0	0	0	0	1	0	1	0	0	0	0	0	0	0	0	0	0	0	1	0	1	0	0	0	0	0	0	0	0	0	0	0	1	0	1
869	sp|P27487|DPP4_HUMAN	sp|P27487|DPP4_HUMAN Dipeptidyl peptidase 4 OS=Homo sapiens GN=DPP4 PE=1 SV=2	88906.74	0	0	0	0	0	0	0	0	0	0	1	0	1	0	0	0	0	0	0	0	0	0	0	0	1	0	1	0	0	0	0	0	0	0	0	0	0	0	1	0	1	0
870	sp|Q6PI73|LIRA6_HUMAN	sp|Q6PI73|LIRA6_HUMAN Leukocyte immunoglobulin-like receptor subfamily A member 6 OS=Homo sapiens GN=LILRA6 PE=2 SV=2	52879.09	0	1	0	0	0	0	0	1	0	0	0	0	0	0	0	1	0	0	0	0	0	1	0	0	0	0	0	0	0	1	0	0	0	0	0	1	0	0	0	0	0	0
871	sp|P16152|CBR1_HUMAN	CBR1_HUMAN Carbonyl reductase	30640.97	0	0	0	0	0	0	0	0	0	0	1	0	1	0	0	0	0	0	0	0	0	0	0	0	1	0	1	0	0	0	0	0	0	0	0	0	0	0	1	0	1	0
872	sp|O00151|PDLI1_HUMAN	sp|O00151|PDLI1_HUMAN PDZ and LIM domain protein 1 OS=Homo sapiens GN=PDLIM1 PE=1 SV=4	36505.21	0	0	0	1	0	0	0	0	0	0	0	0	1	0	0	0	0	1	0	0	0	0	0	0	0	0	1	0	0	0	0	1	0	0	0	0	0	0	0	0	1	0
873	sp|P13928|ANXA8_HUMAN	sp|P13928|ANXA8_HUMAN Annexin A8 OS=Homo sapiens GN=ANXA8 PE=1 SV=3	37085.73	0	1	0	0	0	0	0	0	0	0	0	0	0	1	0	1	0	0	0	0	0	0	0	0	0	0	0	1	0	1	0	0	0	0	0	0	0	0	0	0	0	1
874	sp|O60884|DNJA2_HUMAN	sp|O60884|DNJA2_HUMAN DnaJ homolog subfamily A member 2 OS=Homo sapiens GN=DNAJA2 PE=1 SV=1	46343.83	0	0	1	0	0	0	0	0	0	1	0	0	0	0	0	0	1	0	0	0	0	0	0	1	0	0	0	0	0	0	1	0	0	0	0	0	0	1	0	0	0	0
875	sp|Q5K651|SAMD9_HUMAN	sp|Q5K651|SAMD9_HUMAN Sterile alpha motif domain-containing protein 9 OS=Homo sapiens GN=SAMD9 PE=1 SV=1	185704.15	1	0	0	0	0	0	0	0	0	0	1	0	0	0	1	0	0	0	0	0	0	0	0	0	1	0	0	0	1	0	0	0	0	0	0	0	0	0	1	0	0	0
876	sp|O75643|U520_HUMAN	sp|O75643|U520_HUMAN U5 small nuclear ribonucleoprotein 200 kDa helicase OS=Homo sapiens GN=SNRNP200 PE=1 SV=2	246006.24	1	0	0	0	0	0	0	0	0	0	0	0	1	0	1	0	0	0	0	0	0	0	0	0	0	0	1	0	1	0	0	0	0	0	0	0	0	0	0	0	1	0
877	sp|P14324|FPPS_HUMAN	sp|P14324|FPPS_HUMAN Farnesyl pyrophosphate synthase OS=Homo sapiens GN=FDPS PE=1 SV=4	48757.82	0	0	0	0	0	1	0	0	0	0	0	0	0	1	0	0	0	0	0	1	0	0	0	0	0	0	0	1	0	0	0	0	0	1	0	0	0	0	0	0	0	1
878	sp|Q96S96|PEBP4_HUMAN	sp|Q96S96|PEBP4_HUMAN Phosphatidylethanolamine-binding protein 4 OS=Homo sapiens GN=PEBP4 PE=1 SV=3	26001.88	0	0	0	0	0	0	1	0	0	1	0	0	0	0	0	0	0	0	0	0	1	0	0	1	0	0	0	0	0	0	0	0	0	0	1	0	0	1	0	0	0	0
879	sp|P00734|THRB_HUMAN	sp|P00734|THRB_HUMAN Prothrombin OS=Homo sapiens GN=F2 PE=1 SV=2	71474.68	0	0	0	0	1	0	0	0	1	0	0	0	0	0	0	0	0	0	1	0	0	0	1	0	0	0	0	0	0	0	0	0	1	0	0	0	1	0	0	0	0	0
880	sp|P42766|RL35_HUMAN	sp|P42766|RL35_HUMAN 60S ribosomal protein L35 OS=Homo sapiens GN=RPL35 PE=1 SV=2	14542.56	0	0	0	0	0	1	0	0	0	0	1	0	0	0	0	0	0	0	0	1	0	0	0	0	1	0	0	0	0	0	0	0	0	1	0	0	0	0	1	0	0	0
881	sp|O95372|LYPA2_HUMAN	sp|O95372|LYPA2_HUMAN Acyl-protein thioesterase 2 OS=Homo sapiens GN=LYPLA2 PE=1 SV=1	25062.82	1	0	0	0	0	0	0	0	0	0	0	0	1	0	1	0	0	0	0	0	0	0	0	0	0	0	1	0	1	0	0	0	0	0	0	0	0	0	0	0	1	0
882	sp|P84085|ARF5_HUMAN	sp|P84085|ARF5_HUMAN ADP-ribosylation factor 5 OS=Homo sapiens GN=ARF5 PE=1 SV=2	20630.62	0	1	0	0	0	0	0	0	0	0	0	0	0	1	0	1	0	0	0	0	0	0	0	0	0	0	0	1	0	1	0	0	0	0	0	0	0	0	0	0	0	1
883	sp|P63027|VAMP2_HUMAN	sp|P63027|VAMP2_HUMAN Vesicle-associated membrane protein 2 OS=Homo sapiens GN=VAMP2 PE=1 SV=3	12711.71	0	0	0	0	0	1	0	1	0	1	0	0	0	0	0	0	0	0	0	1	0	1	0	1	0	0	0	0	0	0	0	0	0	1	0	1	0	1	0	0	0	0
884	sp|Q9NZB2|F120A_HUMAN	sp|Q9NZB2|F120A_HUMAN Constitutive coactivator of PPAR-gamma-like protein 1 OS=Homo sapiens GN=FAM120A PE=1 SV=2	123008.0	1	0	0	0	0	0	0	0	0	0	0	0	1	0	1	0	0	0	0	0	0	0	0	0	0	0	1	0	1	0	0	0	0	0	0	0	0	0	0	0	1	0
885	sp|A0AVT1|UBA6_HUMAN	sp|A0AVT1|UBA6_HUMAN Ubiquitin-like modifier-activating enzyme 6 OS=Homo sapiens GN=UBA6 PE=1 SV=1	119206.55	0	0	1	0	0	0	0	0	0	0	1	0	0	0	0	0	1	0	0	0	0	0	0	0	1	0	0	0	0	0	1	0	0	0	0	0	0	0	1	0	0	0
886	sp|P11310|ACADM_HUMAN	sp|P11310|ACADM_HUMAN Medium-chain specific acyl-CoA dehydrogenase, mitochondrial OS=Homo sapiens GN=ACADM PE=1 SV=1	47014.75	0	0	0	1	0	1	0	0	0	0	0	0	0	0	0	0	0	1	0	1	0	0	0	0	0	0	0	0	0	0	0	1	0	1	0	0	0	0	0	0	0	0
887	sp|P49588|SYAC_HUMAN	sp|P49588|SYAC_HUMAN Alanine--tRNA ligase, cytoplasmic OS=Homo sapiens GN=AARS PE=1 SV=2	107484.5	1	0	0	0	0	0	0	0	1	0	0	0	0	0	1	0	0	0	0	0	0	0	1	0	0	0	0	0	1	0	0	0	0	0	0	0	1	0	0	0	0	0
888	sp|P0DJD0|RGPD1_HUMAN	sp|P0DJD0|RGPD1_HUMAN RANBP2-like and GRIP domain-containing protein 1 OS=Homo sapiens GN=RGPD1 PE=2 SV=1	198021.75	0	0	0	0	0	0	0	0	0	1	0	1	0	0	0	0	0	0	0	0	0	0	0	1	0	1	0	0	0	0	0	0	0	0	0	0	0	1	0	1	0	0
889	sp|O75882|ATRN_HUMAN	sp|O75882|ATRN_HUMAN Attractin OS=Homo sapiens GN=ATRN PE=1 SV=2	163450.35	0	0	0	0	0	0	1	0	0	0	0	0	1	0	0	0	0	0	0	0	1	0	0	0	0	0	1	0	0	0	0	0	0	0	1	0	0	0	0	0	1	0
890	sp|Q15717|ELAV1_HUMAN	sp|Q15717|ELAV1_HUMAN ELAV-like protein 1 OS=Homo sapiens GN=ELAVL1 PE=1 SV=2	36240.21	0	0	0	0	0	1	0	0	0	0	0	0	1	0	0	0	0	0	0	1	0	0	0	0	0	0	1	0	0	0	0	0	0	1	0	0	0	0	0	0	1	0
891	sp|P09382|LEG1_HUMAN	sp|P09382|LEG1_HUMAN Galectin-1 OS=Homo sapiens GN=LGALS1 PE=1 SV=2	15048.33	0	0	0	0	0	0	0	1	0	0	0	1	0	0	0	0	0	0	0	0	0	1	0	0	0	1	0	0	0	0	0	0	0	0	0	1	0	0	0	1	0	0
892	sp|Q15056|IF4H_HUMAN	sp|Q15056|IF4H_HUMAN Eukaryotic translation initiation factor 4H OS=Homo sapiens GN=EIF4H PE=1 SV=5	27425.45	0	0	0	0	0	0	0	1	0	0	0	0	0	1	0	0	0	0	0	0	0	1	0	0	0	0	0	1	0	0	0	0	0	0	0	1	0	0	0	0	0	1
893	sp|P09769|FGR_HUMAN	sp|P09769|FGR_HUMAN Tyrosine-protein kinase Fgr OS=Homo sapiens GN=FGR PE=1 SV=2	60067.78	0	0	1	0	1	0	0	0	0	0	0	0	0	0	0	0	1	0	1	0	0	0	0	0	0	0	0	0	0	0	1	0	1	0	0	0	0	0	0	0	0	0
894	sp|Q5TFE4|NT5D1_HUMAN	sp|Q5TFE4|NT5D1_HUMAN 5'-nucleotidase domain-containing protein 1 OS=Homo sapiens GN=NT5DC1 PE=1 SV=1	52439.1	1	0	0	0	0	0	0	0	0	0	0	1	0	0	1	0	0	0	0	0	0	0	0	0	0	1	0	0	1	0	0	0	0	0	0	0	0	0	0	1	0	0
895	sp|P27816|MAP4_HUMAN	sp|P27816|MAP4_HUMAN Microtubule-associated protein 4 OS=Homo sapiens GN=MAP4 PE=1 SV=3	121443.02	0	0	0	0	0	0	0	0	1	0	1	0	0	0	0	0	0	0	0	0	0	0	1	0	1	0	0	0	0	0	0	0	0	0	0	0	1	0	1	0	0	0
896	sp|P53041|PPP5_HUMAN	sp|P53041|PPP5_HUMAN Serine/threonine-protein phosphatase 5 OS=Homo sapiens GN=PPP5C PE=1 SV=1	57412.46	0	0	0	0	0	1	0	0	0	0	0	1	0	0	0	0	0	0	0	1	0	0	0	0	0	1	0	0	0	0	0	0	0	1	0	0	0	0	0	1	0	0
897	sp|P09496|CLCA_HUMAN	sp|P09496|CLCA_HUMAN Clathrin light chain A OS=Homo sapiens GN=CLTA PE=1 SV=1	27174.07	0	0	1	0	0	0	0	0	1	0	0	0	0	0	0	0	1	0	0	0	0	0	1	0	0	0	0	0	0	0	1	0	0	0	0	0	1	0	0	0	0	0
898	sp|P08962|CD63_HUMAN	sp|P08962|CD63_HUMAN CD63 antigen OS=Homo sapiens GN=CD63 PE=1 SV=2	26474.41	0	0	0	1	0	1	0	0	0	0	0	0	0	0	0	0	0	1	0	1	0	0	0	0	0	0	0	0	0	0	0	1	0	1	0	0	0	0	0	0	0	0
899	sp|P30408|T4S1_HUMAN	sp|P30408|T4S1_HUMAN Transmembrane 4 L6 family member 1 OS=Homo sapiens GN=TM4SF1 PE=1 SV=1	22643.87	0	0	0	0	0	0	0	0	0	0	0	0	1	1	0	0	0	0	0	0	0	0	0	0	0	0	1	1	0	0	0	0	0	0	0	0	0	0	0	0	1	1
900	sp|Q5T749|KPRP_HUMAN	sp|Q5T749|KPRP_HUMAN Keratinocyte proline-rich protein OS=Homo sapiens GN=KPRP PE=1 SV=1	67172.4	0	0	0	0	0	0	0	0	0	1	0	1	0	0	0	0	0	0	0	0	0	0	0	1	0	1	0	0	0	0	0	0	0	0	0	0	0	1	0	1	0	0
901	sp|Q9HD89|RETN_HUMAN	sp|Q9HD89|RETN_HUMAN Resistin OS=Homo sapiens GN=RETN PE=1 SV=1	12095.72	0	0	1	0	0	0	0	0	0	0	1	0	0	0	0	0	1	0	0	0	0	0	0	0	1	0	0	0	0	0	1	0	0	0	0	0	0	0	1	0	0	0
902	sp|Q99653|CHP1_HUMAN	sp|Q99653|CHP1_HUMAN Calcineurin B homologous protein 1 OS=Homo sapiens GN=CHP1 PE=1 SV=3	22442.34	0	0	0	0	0	1	0	1	0	0	0	0	0	0	0	0	0	0	0	1	0	1	0	0	0	0	0	0	0	0	0	0	0	1	0	1	0	0	0	0	0	0
903	sp|Q9NY33|DPP3_HUMAN	sp|Q9NY33|DPP3_HUMAN Dipeptidyl peptidase 3 OS=Homo sapiens GN=DPP3 PE=1 SV=2	82879.93	1	0	0	0	0	0	0	0	0	0	1	0	0	0	1	0	0	0	0	0	0	0	0	0	1	0	0	0	1	0	0	0	0	0	0	0	0	0	1	0	0	0
904	sp|Q9H0D6|XRN2_HUMAN	sp|Q9H0D6|XRN2_HUMAN 5'-3' exoribonuclease 2 OS=Homo sapiens GN=XRN2 PE=1 SV=1	109425.63	0	0	1	0	0	0	0	0	0	0	1	0	0	0	0	0	1	0	0	0	0	0	0	0	1	0	0	0	0	0	1	0	0	0	0	0	0	0	1	0	0	0
905	sp|Q9UKV3|ACINU_HUMAN	sp|Q9UKV3|ACINU_HUMAN Apoptotic chromatin condensation inducer in the nucleus OS=Homo sapiens GN=ACIN1 PE=1 SV=2	152169.94	0	0	0	0	0	0	0	0	1	0	1	0	0	0	0	0	0	0	0	0	0	0	1	0	1	0	0	0	0	0	0	0	0	0	0	0	1	0	1	0	0	0
906	sp|Q13618|CUL3_HUMAN	sp|Q13618|CUL3_HUMAN Cullin-3 OS=Homo sapiens GN=CUL3 PE=1 SV=2	89443.67	1	0	0	0	1	0	0	0	0	0	0	0	0	0	1	0	0	0	1	0	0	0	0	0	0	0	0	0	1	0	0	0	1	0	0	0	0	0	0	0	0	0
907	sp|Q08211|DHX9_HUMAN	sp|Q08211|DHX9_HUMAN ATP-dependent RNA helicase A OS=Homo sapiens GN=DHX9 PE=1 SV=4	142180.6	1	0	0	0	0	0	0	0	0	0	0	1	0	0	1	0	0	0	0	0	0	0	0	0	0	1	0	0	1	0	0	0	0	0	0	0	0	0	0	1	0	0
908	sp|P24071|FCAR_HUMAN	sp|P24071|FCAR_HUMAN Immunoglobulin alpha Fc receptor OS=Homo sapiens GN=FCAR PE=1 SV=1	32700.38	0	0	0	0	0	0	0	1	0	0	0	1	0	0	0	0	0	0	0	0	0	1	0	0	0	1	0	0	0	0	0	0	0	0	0	1	0	0	0	1	0	0
909	sp|P17655|CAN2_HUMAN	sp|P17655|CAN2_HUMAN Calpain-2 catalytic subunit OS=Homo sapiens GN=CAPN2 PE=1 SV=6	80800.11	0	0	0	0	0	0	0	0	1	0	0	1	0	0	0	0	0	0	0	0	0	0	1	0	0	1	0	0	0	0	0	0	0	0	0	0	1	0	0	1	0	0
910	sp|O43278|SPIT1_HUMAN	sp|O43278|SPIT1_HUMAN Kunitz-type protease inhibitor 1 OS=Homo sapiens GN=SPINT1 PE=1 SV=2	60127.88	0	0	0	0	0	1	0	0	0	0	0	0	0	1	0	0	0	0	0	1	0	0	0	0	0	0	0	1	0	0	0	0	0	1	0	0	0	0	0	0	0	1
911	sp|Q14116|IL18_HUMAN	sp|Q14116|IL18_HUMAN Interleukin-18 OS=Homo sapiens GN=IL18 PE=1 SV=1	22596.9	1	0	0	0	0	0	0	0	0	0	0	0	1	0	1	0	0	0	0	0	0	0	0	0	0	0	1	0	1	0	0	0	0	0	0	0	0	0	0	0	1	0
912	sp|P11684|UTER_HUMAN	sp|P11684|UTER_HUMAN Uteroglobin OS=Homo sapiens GN=SCGB1A1 PE=1 SV=1	10215.16	1	0	0	0	0	0	1	0	0	0	0	0	0	0	1	0	0	0	0	0	1	0	0	0	0	0	0	0	1	0	0	0	0	0	1	0	0	0	0	0	0	0
913	sp|Q7LBC6|KDM3B_HUMAN	sp|Q7LBC6|KDM3B_HUMAN Lysine-specific demethylase 3B OS=Homo sapiens GN=KDM3B PE=1 SV=2	193172.08	1	0	0	0	0	0	1	0	0	0	0	0	0	0	1	0	0	0	0	0	1	0	0	0	0	0	0	0	1	0	0	0	0	0	1	0	0	0	0	0	0	0
914	sp|P25098|ARBK1_HUMAN	sp|P25098|ARBK1_HUMAN Beta-adrenergic receptor kinase 1 OS=Homo sapiens GN=GRK2 PE=1 SV=2	80320.7	0	0	0	0	0	0	0	0	0	0	0	1	0	1	0	0	0	0	0	0	0	0	0	0	0	1	0	1	0	0	0	0	0	0	0	0	0	0	0	1	0	1
915	sp|Q16891|MIC60_HUMAN	sp|Q16891|MIC60_HUMAN MICOS complex subunit MIC60 OS=Homo sapiens GN=IMMT PE=1 SV=1	84025.5	0	0	0	0	0	0	1	0	0	0	0	0	0	1	0	0	0	0	0	0	1	0	0	0	0	0	0	1	0	0	0	0	0	0	1	0	0	0	0	0	0	1
916	sp|Q4KWH8|PLCH1_HUMAN	sp|Q4KWH8|PLCH1_HUMAN 1-phosphatidylinositol 4,5-bisphosphate phosphodiesterase eta-1 OS=Homo sapiens GN=PLCH1 PE=1 SV=1	191214.09	0	0	0	0	0	0	0	0	0	1	0	0	0	1	0	0	0	0	0	0	0	0	0	1	0	0	0	1	0	0	0	0	0	0	0	0	0	1	0	0	0	1
917	sp|Q15057|ACAP2_HUMAN	sp|Q15057|ACAP2_HUMAN Arf-GAP with coiled-coil, ANK repeat and PH domain-containing protein 2 OS=Homo sapiens GN=ACAP2 PE=1 SV=3	88942.57	0	0	0	0	0	0	0	0	0	1	1	0	0	0	0	0	0	0	0	0	0	0	0	1	1	0	0	0	0	0	0	0	0	0	0	0	0	1	1	0	0	0
918	sp|P61020|RAB5B_HUMAN	sp|P61020|RAB5B_HUMAN Ras-related protein Rab-5B OS=Homo sapiens GN=RAB5B PE=1 SV=1	23919.99	1	0	0	0	0	1	0	0	0	0	0	0	0	0	1	0	0	0	0	1	0	0	0	0	0	0	0	0	1	0	0	0	0	1	0	0	0	0	0	0	0	0
919	sp|O95865|DDAH2_HUMAN	sp|O95865|DDAH2_HUMAN N(G),N(G)-dimethylarginine dimethylaminohydrolase 2 OS=Homo sapiens GN=DDAH2 PE=1 SV=1	29910.56	0	0	0	0	0	0	0	0	0	0	1	1	0	0	0	0	0	0	0	0	0	0	0	0	1	1	0	0	0	0	0	0	0	0	0	0	0	0	1	1	0	0
920	sp|Q9UJY1|HSPB8_HUMAN	sp|Q9UJY1|HSPB8_HUMAN Heat shock protein beta-8 OS=Homo sapiens GN=HSPB8 PE=1 SV=1	21761.69	0	0	0	0	0	1	0	1	0	0	0	0	0	0	0	0	0	0	0	1	0	1	0	0	0	0	0	0	0	0	0	0	0	1	0	1	0	0	0	0	0	0
921	sp|Q92598|HS105_HUMAN	sp|Q92598|HS105_HUMAN Heat shock protein 105 kDa OS=Homo sapiens GN=HSPH1 PE=1 SV=1	97716.0	0	0	0	0	0	0	1	0	1	0	0	0	0	0	0	0	0	0	0	0	1	0	1	0	0	0	0	0	0	0	0	0	0	0	1	0	1	0	0	0	0	0
922	sp|Q9Y678|COPG1_HUMAN	sp|Q9Y678|COPG1_HUMAN Coatomer subunit gamma-1 OS=Homo sapiens GN=COPG1 PE=1 SV=1	98966.96	0	0	0	1	0	0	0	0	0	0	0	0	0	1	0	0	0	1	0	0	0	0	0	0	0	0	0	1	0	0	0	1	0	0	0	0	0	0	0	0	0	1
923	sp|Q9ULE0|WWC3_HUMAN	sp|Q9ULE0|WWC3_HUMAN Protein WWC3 OS=Homo sapiens GN=WWC3 PE=1 SV=3	123740.57	0	0	0	0	1	0	1	0	0	0	0	0	0	0	0	0	0	0	1	0	1	0	0	0	0	0	0	0	0	0	0	0	1	0	1	0	0	0	0	0	0	0
924	sp|P51665|PSMD7_HUMAN	sp|P51665|PSMD7_HUMAN 26S proteasome non-ATPase regulatory subunit 7 OS=Homo sapiens GN=PSMD7 PE=1 SV=2	37059.52	0	1	0	0	0	0	0	0	0	0	0	0	0	1	0	1	0	0	0	0	0	0	0	0	0	0	0	1	0	1	0	0	0	0	0	0	0	0	0	0	0	1
925	sp|P28331|NDUS1_HUMAN	sp|P28331|NDUS1_HUMAN NADH-ubiquinone oxidoreductase 75 kDa subunit, mitochondrial OS=Homo sapiens GN=NDUFS1 PE=1 SV=3	80442.93	1	0	0	0	0	0	0	0	0	0	0	0	1	0	1	0	0	0	0	0	0	0	0	0	0	0	1	0	1	0	0	0	0	0	0	0	0	0	0	0	1	0
926	sp|Q13449|LSAMP_HUMAN	sp|Q13449|LSAMP_HUMAN Limbic system-associated membrane protein OS=Homo sapiens GN=LSAMP PE=1 SV=2	37883.4	0	0	1	0	0	0	0	0	1	0	0	0	0	0	0	0	1	0	0	0	0	0	1	0	0	0	0	0	0	0	1	0	0	0	0	0	1	0	0	0	0	0
927	sp|P23284|PPIB_HUMAN	sp|P23284|PPIB_HUMAN Peptidyl-prolyl cis-trans isomerase B OS=Homo sapiens GN=PPIB PE=1 SV=2	23784.56	0	0	0	0	1	0	1	0	0	0	0	0	0	0	0	0	0	0	1	0	1	0	0	0	0	0	0	0	0	0	0	0	1	0	1	0	0	0	0	0	0	0
928	sp|O43390|HNRPR_HUMAN	sp|O43390|HNRPR_HUMAN Heterogeneous nuclear ribonucleoprotein R OS=Homo sapiens GN=HNRNPR PE=1 SV=1	71184.36	1	0	0	0	0	0	0	0	0	0	1	0	0	0	1	0	0	0	0	0	0	0	0	0	1	0	0	0	1	0	0	0	0	0	0	0	0	0	1	0	0	0
929	sp|O60701|UGDH_HUMAN	sp|O60701|UGDH_HUMAN UDP-glucose 6-dehydrogenase OS=Homo sapiens GN=UGDH PE=1 SV=1	55673.51	1	0	1	0	0	0	0	0	0	0	0	0	0	0	1	0	1	0	0	0	0	0	0	0	0	0	0	0	1	0	1	0	0	0	0	0	0	0	0	0	0	0
930	sp|Q9P2T1|GMPR2_HUMAN	sp|Q9P2T1|GMPR2_HUMAN GMP reductase 2 OS=Homo sapiens GN=GMPR2 PE=1 SV=1	38363.2	0	0	0	0	0	0	0	0	0	0	1	0	1	0	0	0	0	0	0	0	0	0	0	0	1	0	1	0	0	0	0	0	0	0	0	0	0	0	1	0	1	0
931	sp|Q9UJZ1|STML2_HUMAN	sp|Q9UJZ1|STML2_HUMAN Stomatin-like protein 2, mitochondrial OS=Homo sapiens GN=STOML2 PE=1 SV=1	38624.24	0	0	0	0	0	0	0	1	0	0	0	0	0	1	0	0	0	0	0	0	0	1	0	0	0	0	0	1	0	0	0	0	0	0	0	1	0	0	0	0	0	1
932	sp|P01814|HV270_HUMAN	sp|P01814|HV270_HUMAN Immunoglobulin heavy variable 2-70 OS=Homo sapiens GN=IGHV2-70 PE=1 SV=2	13479.81	0	0	0	1	0	1	0	0	0	0	0	0	0	0	0	0	0	1	0	1	0	0	0	0	0	0	0	0	0	0	0	1	0	1	0	0	0	0	0	0	0	0
933	sp|Q07020|RL18_HUMAN	sp|Q07020|RL18_HUMAN 60S ribosomal protein L18 OS=Homo sapiens GN=RPL18 PE=1 SV=2	21735.11	0	0	0	0	0	0	0	1	0	1	0	0	0	0	0	0	0	0	0	0	0	1	0	1	0	0	0	0	0	0	0	0	0	0	0	1	0	1	0	0	0	0
934	sp|Q02218|ODO1_HUMAN	sp|Q02218|ODO1_HUMAN 2-oxoglutarate dehydrogenase, mitochondrial OS=Homo sapiens GN=OGDH PE=1 SV=3	117058.85	0	0	0	0	0	0	1	0	0	0	1	0	0	0	0	0	0	0	0	0	1	0	0	0	1	0	0	0	0	0	0	0	0	0	1	0	0	0	1	0	0	0
935	sp|P10768|ESTD_HUMAN	sp|P10768|ESTD_HUMAN S-formylglutathione hydrolase OS=Homo sapiens GN=ESD PE=1 SV=2	31955.65	0	0	1	0	0	1	0	0	0	0	0	0	0	0	0	0	1	0	0	1	0	0	0	0	0	0	0	0	0	0	1	0	0	1	0	0	0	0	0	0	0	0
936	sp|P09132|SRP19_HUMAN	sp|P09132|SRP19_HUMAN Signal recognition particle 19 kDa protein OS=Homo sapiens GN=SRP19 PE=1 SV=3	16373.52	0	0	0	0	0	0	1	1	0	0	0	0	0	0	0	0	0	0	0	0	1	1	0	0	0	0	0	0	0	0	0	0	0	0	1	1	0	0	0	0	0	0
937	sp|P62277|RS13_HUMAN	sp|P62277|RS13_HUMAN 40S ribosomal protein S13 OS=Homo sapiens GN=RPS13 PE=1 SV=2	17211.67	0	0	0	0	0	0	1	0	0	0	0	0	1	0	0	0	0	0	0	0	1	0	0	0	0	0	1	0	0	0	0	0	0	0	1	0	0	0	0	0	1	0
938	sp|Q7Z6G8|ANS1B_HUMAN	sp|Q7Z6G8|ANS1B_HUMAN Ankyrin repeat and sterile alpha motif domain-containing protein 1B OS=Homo sapiens GN=ANKS1B PE=1 SV=2	139234.7	0	0	0	1	0	0	0	0	0	0	0	0	0	1	0	0	0	1	0	0	0	0	0	0	0	0	0	1	0	0	0	1	0	0	0	0	0	0	0	0	0	1
939	sp|Q96NY8|NECT4_HUMAN	sp|Q96NY8|NECT4_HUMAN Nectin-4 OS=Homo sapiens GN=NECTIN4 PE=1 SV=1	55932.97	0	0	0	0	0	0	0	1	1	0	0	0	0	0	0	0	0	0	0	0	0	1	1	0	0	0	0	0	0	0	0	0	0	0	0	1	1	0	0	0	0	0
940	sp|P31939|PUR9_HUMAN	sp|P31939|PUR9_HUMAN Bifunctional purine biosynthesis protein PURH OS=Homo sapiens GN=ATIC PE=1 SV=3	65088.53	0	0	1	0	1	0	0	0	0	0	0	0	0	0	0	0	1	0	1	0	0	0	0	0	0	0	0	0	0	0	1	0	1	0	0	0	0	0	0	0	0	0
941	sp|Q9UHB6|LIMA1_HUMAN	sp|Q9UHB6|LIMA1_HUMAN LIM domain and actin-binding protein 1 OS=Homo sapiens GN=LIMA1 PE=1 SV=1	85629.53	0	0	1	0	0	0	0	0	0	0	0	0	1	0	0	0	1	0	0	0	0	0	0	0	0	0	1	0	0	0	1	0	0	0	0	0	0	0	0	0	1	0
942	sp|P63218|GBG5_HUMAN	sp|P63218|GBG5_HUMAN Guanine nucleotide-binding protein G(I)/G(S)/G(O) subunit gamma-5 OS=Homo sapiens GN=GNG5 PE=1 SV=3	7427.85	0	0	0	0	0	1	0	0	0	0	0	1	0	0	0	0	0	0	0	1	0	0	0	0	0	1	0	0	0	0	0	0	0	1	0	0	0	0	0	1	0	0
943	sp|Q8N335|GPD1L_HUMAN	sp|Q8N335|GPD1L_HUMAN Glycerol-3-phosphate dehydrogenase 1-like protein OS=Homo sapiens GN=GPD1L PE=1 SV=1	39021.16	0	0	1	0	1	0	0	0	0	0	0	0	0	0	0	0	1	0	1	0	0	0	0	0	0	0	0	0	0	0	1	0	1	0	0	0	0	0	0	0	0	0
944	sp|P00748|FA12_HUMAN	sp|P00748|FA12_HUMAN Coagulation factor XII OS=Homo sapiens GN=F12 PE=1 SV=3	70028.75	0	0	0	0	1	0	0	0	0	0	0	0	1	0	0	0	0	0	1	0	0	0	0	0	0	0	1	0	0	0	0	0	1	0	0	0	0	0	0	0	1	0
945	sp|P30038|AL4A1_HUMAN	sp|P30038|AL4A1_HUMAN Delta-1-pyrroline-5-carboxylate dehydrogenase, mitochondrial OS=Homo sapiens GN=ALDH4A1 PE=1 SV=3	62136.77	0	0	0	1	0	1	0	0	0	0	0	0	0	0	0	0	0	1	0	1	0	0	0	0	0	0	0	0	0	0	0	1	0	1	0	0	0	0	0	0	0	0
946	sp|P06681|CO2_HUMAN	sp|P06681|CO2_HUMAN Complement C2 OS=Homo sapiens GN=C2 PE=1 SV=2	84582.83	0	0	1	0	0	0	0	0	0	0	0	0	1	0	0	0	1	0	0	0	0	0	0	0	0	0	1	0	0	0	1	0	0	0	0	0	0	0	0	0	1	0
947	sp|O75436|VP26A_HUMAN	sp|O75436|VP26A_HUMAN Vacuolar protein sorting-associated protein 26A OS=Homo sapiens GN=VPS26A PE=1 SV=2	38259.79	0	1	0	0	0	1	0	0	0	0	0	0	0	0	0	1	0	0	0	1	0	0	0	0	0	0	0	0	0	1	0	0	0	1	0	0	0	0	0	0	0	0
948	sp|Q9Y6X9|MORC2_HUMAN	sp|Q9Y6X9|MORC2_HUMAN MORC family CW-type zinc finger protein 2 OS=Homo sapiens GN=MORC2 PE=1 SV=2	118548.02	0	1	0	0	0	0	0	0	0	0	0	0	1	0	0	1	0	0	0	0	0	0	0	0	0	0	1	0	0	1	0	0	0	0	0	0	0	0	0	0	1	0
949	sp|Q13155|AIMP2_HUMAN	sp|Q13155|AIMP2_HUMAN Aminoacyl tRNA synthase complex-interacting multifunctional protein 2 OS=Homo sapiens GN=AIMP2 PE=1 SV=2	35668.41	0	0	1	0	0	0	0	0	0	0	0	0	0	1	0	0	1	0	0	0	0	0	0	0	0	0	0	1	0	0	1	0	0	0	0	0	0	0	0	0	0	1
950	sp|P17213|BPI_HUMAN	sp|P17213|BPI_HUMAN Bactericidal permeability-increasing protein OS=Homo sapiens GN=BPI PE=1 SV=4	54093.15	0	0	0	0	0	0	0	1	0	1	0	0	0	0	0	0	0	0	0	0	0	1	0	1	0	0	0	0	0	0	0	0	0	0	0	1	0	1	0	0	0	0
951	sp|Q9Y6E0|STK24_HUMAN	sp|Q9Y6E0|STK24_HUMAN Serine/threonine-protein kinase 24 OS=Homo sapiens GN=STK24 PE=1 SV=1	49562.42	0	0	0	1	0	0	0	0	0	0	0	1	0	0	0	0	0	1	0	0	0	0	0	0	0	1	0	0	0	0	0	1	0	0	0	0	0	0	0	1	0	0
952	sp|P12270|TPR_HUMAN	sp|P12270|TPR_HUMAN Nucleoprotein TPR OS=Homo sapiens GN=TPR PE=1 SV=3	267530.26	1	0	0	0	0	0	0	0	1	0	0	0	0	0	1	0	0	0	0	0	0	0	1	0	0	0	0	0	1	0	0	0	0	0	0	0	1	0	0	0	0	0
953	sp|P53007|TXTP_HUMAN	sp|P53007|TXTP_HUMAN Tricarboxylate transport protein, mitochondrial OS=Homo sapiens GN=SLC25A1 PE=1 SV=2	34333.13	0	0	0	0	0	0	0	0	0	0	1	0	1	0	0	0	0	0	0	0	0	0	0	0	1	0	1	0	0	0	0	0	0	0	0	0	0	0	1	0	1	0
954	sp|Q9HAN9|NMNA1_HUMAN	sp|Q9HAN9|NMNA1_HUMAN Nicotinamide/nicotinic acid mononucleotide adenylyltransferase 1 OS=Homo sapiens GN=NMNAT1 PE=1 SV=1	32140.66	0	0	0	0	0	0	0	1	0	0	0	0	0	0	0	0	0	0	0	0	0	1	0	0	0	0	0	0	0	0	0	0	0	0	0	1	0	0	0	0	0	0
955	sp|P16435|NCPR_HUMAN	sp|P16435|NCPR_HUMAN NADPH--cytochrome P450 reductase OS=Homo sapiens GN=POR PE=1 SV=2	77097.42	0	0	1	0	0	0	0	0	0	0	0	0	0	0	0	0	1	0	0	0	0	0	0	0	0	0	0	0	0	0	1	0	0	0	0	0	0	0	0	0	0	0
956	sp|P14868|SYDC_HUMAN	sp|P14868|SYDC_HUMAN Aspartate--tRNA ligase, cytoplasmic OS=Homo sapiens GN=DARS PE=1 SV=2	57499.18	0	0	0	0	0	0	1	0	0	0	0	0	0	0	0	0	0	0	0	0	1	0	0	0	0	0	0	0	0	0	0	0	0	0	1	0	0	0	0	0	0	0
957	sp|P10523|ARRS_HUMAN	sp|P10523|ARRS_HUMAN S-arrestin OS=Homo sapiens GN=SAG PE=1 SV=3	45262.53	0	0	0	0	0	0	0	0	0	1	0	0	0	0	0	0	0	0	0	0	0	0	0	1	0	0	0	0	0	0	0	0	0	0	0	0	0	1	0	0	0	0
958	sp|Q9P283|SEM5B_HUMAN	sp|Q9P283|SEM5B_HUMAN Semaphorin-5B OS=Homo sapiens GN=SEMA5B PE=2 SV=4	129595.14	0	0	0	1	0	0	0	0	0	0	0	0	0	0	0	0	0	1	0	0	0	0	0	0	0	0	0	0	0	0	0	1	0	0	0	0	0	0	0	0	0	0
959	sp|O15049|N4BP3_HUMAN	sp|O15049|N4BP3_HUMAN NEDD4-binding protein 3 OS=Homo sapiens GN=N4BP3 PE=1 SV=3	60888.89	0	0	0	1	0	0	0	0	0	0	0	0	0	0	0	0	0	1	0	0	0	0	0	0	0	0	0	0	0	0	0	1	0	0	0	0	0	0	0	0	0	0
960	sp|O75695|XRP2_HUMAN	sp|O75695|XRP2_HUMAN Protein XRP2 OS=Homo sapiens GN=RP2 PE=1 SV=4	40470.78	0	0	0	1	0	0	0	0	0	0	0	0	0	0	0	0	0	1	0	0	0	0	0	0	0	0	0	0	0	0	0	1	0	0	0	0	0	0	0	0	0	0
961	sp|P15121|ALDR_HUMAN	sp|P15121|ALDR_HUMAN Aldose reductase OS=Homo sapiens GN=AKR1B1 PE=1 SV=3	36229.64	0	0	0	0	0	0	1	0	0	0	0	0	0	0	0	0	0	0	0	0	1	0	0	0	0	0	0	0	0	0	0	0	0	0	1	0	0	0	0	0	0	0
962	sp|Q8TF72|SHRM3_HUMAN	sp|Q8TF72|SHRM3_HUMAN Protein Shroom3 OS=Homo sapiens GN=SHROOM3 PE=1 SV=2	218320.92	0	0	0	0	0	0	0	0	0	0	0	0	1	0	0	0	0	0	0	0	0	0	0	0	0	0	1	0	0	0	0	0	0	0	0	0	0	0	0	0	1	0
963	sp|Q15008|PSMD6_HUMAN	sp|Q15008|PSMD6_HUMAN 26S proteasome non-ATPase regulatory subunit 6 OS=Homo sapiens GN=PSMD6 PE=1 SV=1	45787.38	0	0	0	0	0	0	0	0	0	0	0	1	0	0	0	0	0	0	0	0	0	0	0	0	0	1	0	0	0	0	0	0	0	0	0	0	0	0	0	1	0	0
964	sp|Q96A26|F162A_HUMAN	sp|Q96A26|F162A_HUMAN Protein FAM162A OS=Homo sapiens GN=FAM162A PE=1 SV=2	17559.27	0	0	0	0	0	0	0	0	0	0	0	1	0	0	0	0	0	0	0	0	0	0	0	0	0	1	0	0	0	0	0	0	0	0	0	0	0	0	0	1	0	0
965	sp|P01706|LV211_HUMAN	sp|P01706|LV211_HUMAN Immunoglobulin lambda variable 2-11 OS=Homo sapiens GN=IGLV2-11 PE=1 SV=2	12807.08	0	0	0	0	0	0	1	0	0	0	0	0	0	0	0	0	0	0	0	0	1	0	0	0	0	0	0	0	0	0	0	0	0	0	1	0	0	0	0	0	0	0
966	sp|P55210|CASP7_HUMAN	sp|P55210|CASP7_HUMAN Caspase-7 OS=Homo sapiens GN=CASP7 PE=1 SV=1	34882.02	0	0	0	0	1	0	0	0	0	0	0	0	0	0	0	0	0	0	1	0	0	0	0	0	0	0	0	0	0	0	0	0	1	0	0	0	0	0	0	0	0	0
967	sp|O95433|AHSA1_HUMAN	sp|O95433|AHSA1_HUMAN Activator of 90 kDa heat shock protein ATPase homolog 1 OS=Homo sapiens GN=AHSA1 PE=1 SV=1	38421.31	0	0	0	0	0	1	0	0	0	0	0	0	0	0	0	0	0	0	0	1	0	0	0	0	0	0	0	0	0	0	0	0	0	1	0	0	0	0	0	0	0	0
968	sp|Q9HCS7|SYF1_HUMAN	sp|Q9HCS7|SYF1_HUMAN Pre-mRNA-splicing factor SYF1 OS=Homo sapiens GN=XAB2 PE=1 SV=2	100744.74	0	0	0	0	0	0	0	0	0	0	0	0	1	0	0	0	0	0	0	0	0	0	0	0	0	0	1	0	0	0	0	0	0	0	0	0	0	0	0	0	1	0
969	sp|Q96NY7|CLIC6_HUMAN	sp|Q96NY7|CLIC6_HUMAN Chloride intracellular channel protein 6 OS=Homo sapiens GN=CLIC6 PE=2 SV=3	73195.8	0	0	0	0	0	0	1	0	0	0	0	0	0	0	0	0	0	0	0	0	1	0	0	0	0	0	0	0	0	0	0	0	0	0	1	0	0	0	0	0	0	0
970	sp|P30048|PRDX3_HUMAN	sp|P30048|PRDX3_HUMAN Thioredoxin-dependent peroxide reductase, mitochondrial OS=Homo sapiens GN=PRDX3 PE=1 SV=3	28017.3	0	0	0	0	0	0	0	0	0	1	0	0	0	0	0	0	0	0	0	0	0	0	0	1	0	0	0	0	0	0	0	0	0	0	0	0	0	1	0	0	0	0
971	sp|Q15208|STK38_HUMAN	sp|Q15208|STK38_HUMAN Serine/threonine-protein kinase 38 OS=Homo sapiens GN=STK38 PE=1 SV=1	54497.5	0	0	0	0	0	0	0	0	0	1	0	0	0	0	0	0	0	0	0	0	0	0	0	1	0	0	0	0	0	0	0	0	0	0	0	0	0	1	0	0	0	0
972	sp|P25325|THTM_HUMAN	sp|P25325|THTM_HUMAN 3-mercaptopyruvate sulfurtransferase OS=Homo sapiens GN=MPST PE=1 SV=3	33442.75	0	0	0	1	0	0	0	0	0	0	0	0	0	0	0	0	0	1	0	0	0	0	0	0	0	0	0	0	0	0	0	1	0	0	0	0	0	0	0	0	0	0
973	sp|Q9BVI0|PHF20_HUMAN	sp|Q9BVI0|PHF20_HUMAN PHD finger protein 20 OS=Homo sapiens GN=PHF20 PE=1 SV=2	116739.28	0	0	0	0	0	0	0	0	0	0	1	0	0	0	0	0	0	0	0	0	0	0	0	0	1	0	0	0	0	0	0	0	0	0	0	0	0	0	1	0	0	0
974	sp|Q9HAB8|PPCS_HUMAN	sp|Q9HAB8|PPCS_HUMAN Phosphopantothenate--cysteine ligase OS=Homo sapiens GN=PPCS PE=1 SV=2	33983.79	0	0	0	0	0	0	0	0	0	0	1	0	0	0	0	0	0	0	0	0	0	0	0	0	1	0	0	0	0	0	0	0	0	0	0	0	0	0	1	0	0	0
975	sp|Q5T013|HYI_HUMAN	sp|Q5T013|HYI_HUMAN Putative hydroxypyruvate isomerase OS=Homo sapiens GN=HYI PE=1 SV=2	30500.61	0	0	0	0	0	1	0	0	0	0	0	0	0	0	0	0	0	0	0	1	0	0	0	0	0	0	0	0	0	0	0	0	0	1	0	0	0	0	0	0	0	0
976	sp|Q5T4S7|UBR4_HUMAN	sp|Q5T4S7|UBR4_HUMAN E3 ubiquitin-protein ligase UBR4 OS=Homo sapiens GN=UBR4 PE=1 SV=1	580547.11	0	0	0	0	0	0	0	0	1	0	0	0	0	0	0	0	0	0	0	0	0	0	1	0	0	0	0	0	0	0	0	0	0	0	0	0	1	0	0	0	0	0
977	sp|Q12959|DLG1_HUMAN	sp|Q12959|DLG1_HUMAN Disks large homolog 1 OS=Homo sapiens GN=DLG1 PE=1 SV=2	100678.34	0	0	0	0	0	0	0	0	0	0	0	0	1	0	0	0	0	0	0	0	0	0	0	0	0	0	1	0	0	0	0	0	0	0	0	0	0	0	0	0	1	0
978	sp|Q9Y446|PKP3_HUMAN	sp|Q9Y446|PKP3_HUMAN Plakophilin-3 OS=Homo sapiens GN=PKP3 PE=1 SV=1	87485.16	0	0	0	1	0	0	0	0	0	0	0	0	0	0	0	0	0	1	0	0	0	0	0	0	0	0	0	0	0	0	0	1	0	0	0	0	0	0	0	0	0	0
979	sp|P59826|BPIB3_HUMAN	sp|P59826|BPIB3_HUMAN BPI fold-containing family B member 3 OS=Homo sapiens GN=BPIFB3 PE=2 SV=2	50538.82	0	0	0	0	0	0	0	0	0	0	0	0	0	1	0	0	0	0	0	0	0	0	0	0	0	0	0	1	0	0	0	0	0	0	0	0	0	0	0	0	0	1
980	sp|P36268|GGT2_HUMAN	sp|P36268|GGT2_HUMAN Inactive gamma-glutamyltranspeptidase 2 OS=Homo sapiens GN=GGT2 PE=1 SV=3	62074.2	0	0	0	0	0	0	0	0	0	0	0	0	0	1	0	0	0	0	0	0	0	0	0	0	0	0	0	1	0	0	0	0	0	0	0	0	0	0	0	0	0	1
981	sp|Q86YF9|DZIP1_HUMAN		0.0	0	0	0	0	0	0	0	0	0	0	0	1	0	0	0	0	0	0	0	0	0	0	0	0	0	1	0	0	0	0	0	0	0	0	0	0	0	0	0	1	0	0
982	sp|Q8NF50|DOCK8_HUMAN	sp|Q8NF50|DOCK8_HUMAN Dedicator of cytokinesis protein 8 OS=Homo sapiens GN=DOCK8 PE=1 SV=3	240886.31	0	0	0	0	0	0	0	0	0	0	0	0	0	1	0	0	0	0	0	0	0	0	0	0	0	0	0	1	0	0	0	0	0	0	0	0	0	0	0	0	0	1
983	sp|Q02790|FKBP4_HUMAN	sp|Q02790|FKBP4_HUMAN Peptidyl-prolyl cis-trans isomerase FKBP4 OS=Homo sapiens GN=FKBP4 PE=1 SV=3	52057.18	0	0	0	0	0	0	0	0	0	0	0	0	0	1	0	0	0	0	0	0	0	0	0	0	0	0	0	1	0	0	0	0	0	0	0	0	0	0	0	0	0	1
984	sp|P12724|ECP_HUMAN	sp|P12724|ECP_HUMAN Eosinophil cationic protein OS=Homo sapiens GN=RNASE3 PE=1 SV=2	18886.54	0	1	0	0	0	0	0	0	0	0	0	0	0	0	0	1	0	0	0	0	0	0	0	0	0	0	0	0	0	1	0	0	0	0	0	0	0	0	0	0	0	0
985	sp|Q03252|LMNB2_HUMAN	sp|Q03252|LMNB2_HUMAN Lamin-B2 OS=Homo sapiens GN=LMNB2 PE=1 SV=4	70019.74	0	0	0	1	0	0	0	0	0	0	0	0	0	0	0	0	0	1	0	0	0	0	0	0	0	0	0	0	0	0	0	1	0	0	0	0	0	0	0	0	0	0
986	sp|Q5VWP2|FA46C_HUMAN	sp|Q5VWP2|FA46C_HUMAN Protein FAM46C OS=Homo sapiens GN=FAM46C PE=1 SV=1	45485.99	0	0	0	0	0	0	1	0	0	0	0	0	0	0	0	0	0	0	0	0	1	0	0	0	0	0	0	0	0	0	0	0	0	0	1	0	0	0	0	0	0	0
987	sp|O43684|BUB3_HUMAN	sp|O43684|BUB3_HUMAN Mitotic checkpoint protein BUB3 OS=Homo sapiens GN=BUB3 PE=1 SV=1	37587.35	0	0	0	0	0	0	0	0	0	1	0	0	0	0	0	0	0	0	0	0	0	0	0	1	0	0	0	0	0	0	0	0	0	0	0	0	0	1	0	0	0	0
988	sp|Q8IU81|I2BP1_HUMAN	sp|Q8IU81|I2BP1_HUMAN Interferon regulatory factor 2-binding protein 1 OS=Homo sapiens GN=IRF2BP1 PE=1 SV=1	62561.32	0	0	0	0	0	0	0	0	1	0	0	0	0	0	0	0	0	0	0	0	0	0	1	0	0	0	0	0	0	0	0	0	0	0	0	0	1	0	0	0	0	0
989	sp|A6NM62|LRC53_HUMAN	sp|A6NM62|LRC53_HUMAN Leucine-rich repeat-containing protein 53 OS=Homo sapiens GN=LRRC53 PE=4 SV=2	142079.5	0	0	0	0	0	1	0	0	0	0	0	0	0	0	0	0	0	0	0	1	0	0	0	0	0	0	0	0	0	0	0	0	0	1	0	0	0	0	0	0	0	0
990	sp|Q9P2N4|ATS9_HUMAN	sp|Q9P2N4|ATS9_HUMAN A disintegrin and metalloproteinase with thrombospondin motifs 9 OS=Homo sapiens GN=ADAMTS9 PE=1 SV=4	223706.33	0	0	0	1	0	0	0	0	0	0	0	0	0	0	0	0	0	1	0	0	0	0	0	0	0	0	0	0	0	0	0	1	0	0	0	0	0	0	0	0	0	0
991	sp|O95994|AGR2_HUMAN	sp|O95994|AGR2_HUMAN Anterior gradient protein 2 homolog OS=Homo sapiens GN=AGR2 PE=1 SV=1	20023.64	1	0	0	0	0	0	0	0	0	0	0	0	0	0	1	0	0	0	0	0	0	0	0	0	0	0	0	0	1	0	0	0	0	0	0	0	0	0	0	0	0	0
992	sp|P63151|2ABA_HUMAN	sp|P63151|2ABA_HUMAN Serine/threonine-protein phosphatase 2A 55 kDa regulatory subunit B alpha isoform OS=Homo sapiens GN=PPP2R2A PE=1 SV=1	52172.68	0	0	0	0	0	0	0	0	0	0	0	0	0	1	0	0	0	0	0	0	0	0	0	0	0	0	0	1	0	0	0	0	0	0	0	0	0	0	0	0	0	1
993	sp|Q8NG11|TSN14_HUMAN	sp|Q8NG11|TSN14_HUMAN Tetraspanin-14 OS=Homo sapiens GN=TSPAN14 PE=1 SV=1	31354.83	0	0	0	0	0	0	0	0	1	0	0	0	0	0	0	0	0	0	0	0	0	0	1	0	0	0	0	0	0	0	0	0	0	0	0	0	1	0	0	0	0	0
994	sp|P22087|FBRL_HUMAN	sp|P22087|FBRL_HUMAN rRNA 2'-O-methyltransferase fibrillarin OS=Homo sapiens GN=FBL PE=1 SV=2	33877.46	0	0	0	0	0	0	0	0	0	0	0	1	0	0	0	0	0	0	0	0	0	0	0	0	0	1	0	0	0	0	0	0	0	0	0	0	0	0	0	1	0	0
995	sp|Q8TF05|PP4R1_HUMAN	sp|Q8TF05|PP4R1_HUMAN Serine/threonine-protein phosphatase 4 regulatory subunit 1 OS=Homo sapiens GN=PPP4R1 PE=1 SV=1	108361.49	0	0	0	0	0	0	0	1	0	0	0	0	0	0	0	0	0	0	0	0	0	1	0	0	0	0	0	0	0	0	0	0	0	0	0	1	0	0	0	0	0	0
996	sp|P42025|ACTY_HUMAN	sp|P42025|ACTY_HUMAN Beta-centractin OS=Homo sapiens GN=ACTR1B PE=1 SV=1	42380.77	0	0	0	0	0	0	0	0	1	0	0	0	0	0	0	0	0	0	0	0	0	0	1	0	0	0	0	0	0	0	0	0	0	0	0	0	1	0	0	0	0	0
997	sp|A8MT65|ZN891_HUMAN	sp|A8MT65|ZN891_HUMAN Zinc finger protein 891 OS=Homo sapiens GN=ZNF891 PE=2 SV=2	65032.74	1	0	0	0	0	0	0	0	0	0	0	0	0	0	1	0	0	0	0	0	0	0	0	0	0	0	0	0	1	0	0	0	0	0	0	0	0	0	0	0	0	0
998	sp|Q14C86|GAPD1_HUMAN	sp|Q14C86|GAPD1_HUMAN GTPase-activating protein and VPS9 domain-containing protein 1 OS=Homo sapiens GN=GAPVD1 PE=1 SV=2	166359.05	0	0	0	0	1	0	0	0	0	0	0	0	0	0	0	0	0	0	1	0	0	0	0	0	0	0	0	0	0	0	0	0	1	0	0	0	0	0	0	0	0	0
999	sp|P10619|PPGB_HUMAN	sp|P10619|PPGB_HUMAN Lysosomal protective protein OS=Homo sapiens GN=CTSA PE=1 SV=2	54944.31	1	0	0	0	0	0	0	0	0	0	0	0	0	0	1	0	0	0	0	0	0	0	0	0	0	0	0	0	1	0	0	0	0	0	0	0	0	0	0	0	0	0
1000	sp|Q9HD42|CHM1A_HUMAN	sp|Q9HD42|CHM1A_HUMAN Charged multivesicular body protein 1a OS=Homo sapiens GN=CHMP1A PE=1 SV=1	21746.21	0	0	0	0	0	0	0	0	0	0	0	0	0	1	0	0	0	0	0	0	0	0	0	0	0	0	0	1	0	0	0	0	0	0	0	0	0	0	0	0	0	1
1001	sp|P29144|TPP2_HUMAN	sp|P29144|TPP2_HUMAN Tripeptidyl-peptidase 2 OS=Homo sapiens GN=TPP2 PE=1 SV=4	139745.18	0	0	0	0	0	0	1	0	0	0	0	0	0	0	0	0	0	0	0	0	1	0	0	0	0	0	0	0	0	0	0	0	0	0	1	0	0	0	0	0	0	0
1002	sp|Q9Y3Z3|SAMH1_HUMAN	sp|Q9Y3Z3|SAMH1_HUMAN Deoxynucleoside triphosphate triphosphohydrolase SAMHD1 OS=Homo sapiens GN=SAMHD1 PE=1 SV=2	72896.05	0	0	0	0	0	0	0	0	1	0	0	0	0	0	0	0	0	0	0	0	0	0	1	0	0	0	0	0	0	0	0	0	0	0	0	0	1	0	0	0	0	0
1003	sp|O95757|HS74L_HUMAN	sp|O95757|HS74L_HUMAN Heat shock 70 kDa protein 4L OS=Homo sapiens GN=HSPA4L PE=1 SV=3	95478.91	0	1	0	0	0	0	0	0	0	0	0	0	0	0	0	1	0	0	0	0	0	0	0	0	0	0	0	0	0	1	0	0	0	0	0	0	0	0	0	0	0	0
1004	sp|O95197|RTN3_HUMAN	sp|O95197|RTN3_HUMAN Reticulon-3 OS=Homo sapiens GN=RTN3 PE=1 SV=2	113168.66	0	0	0	0	0	0	0	1	0	0	0	0	0	0	0	0	0	0	0	0	0	1	0	0	0	0	0	0	0	0	0	0	0	0	0	1	0	0	0	0	0	0
1005	sp|Q6ZNJ1|NBEL2_HUMAN	sp|Q6ZNJ1|NBEL2_HUMAN Neurobeachin-like protein 2 OS=Homo sapiens GN=NBEAL2 PE=1 SV=2	305404.8	0	0	0	0	0	0	0	0	0	0	0	0	1	0	0	0	0	0	0	0	0	0	0	0	0	0	1	0	0	0	0	0	0	0	0	0	0	0	0	0	1	0
1006	sp|Q5T0F9|C2D1B_HUMAN	sp|Q5T0F9|C2D1B_HUMAN Coiled-coil and C2 domain-containing protein 1B OS=Homo sapiens GN=CC2D1B PE=1 SV=1	94394.47	0	0	0	0	0	1	0	0	0	0	0	0	0	0	0	0	0	0	0	1	0	0	0	0	0	0	0	0	0	0	0	0	0	1	0	0	0	0	0	0	0	0
1007	sp|P12259|FA5_HUMAN	sp|P12259|FA5_HUMAN Coagulation factor V OS=Homo sapiens GN=F5 PE=1 SV=4	252685.94	0	1	0	0	0	0	0	0	0	0	0	0	0	0	0	1	0	0	0	0	0	0	0	0	0	0	0	0	0	1	0	0	0	0	0	0	0	0	0	0	0	0
1008	sp|Q11128|FUT5_HUMAN	sp|Q11128|FUT5_HUMAN Alpha-(1,3)-fucosyltransferase 5 OS=Homo sapiens GN=FUT5 PE=2 SV=1	43436.58	0	0	0	0	0	0	0	0	0	0	0	1	0	0	0	0	0	0	0	0	0	0	0	0	0	1	0	0	0	0	0	0	0	0	0	0	0	0	0	1	0	0
1009	sp|Q8TCT9|HM13_HUMAN	sp|Q8TCT9|HM13_HUMAN Minor histocompatibility antigen H13 OS=Homo sapiens GN=HM13 PE=1 SV=1	41746.66	0	0	0	0	0	0	0	0	0	0	1	0	0	0	0	0	0	0	0	0	0	0	0	0	1	0	0	0	0	0	0	0	0	0	0	0	0	0	1	0	0	0
1010	sp|Q16836|HCDH_HUMAN	sp|Q16836|HCDH_HUMAN Hydroxyacyl-coenzyme A dehydrogenase, mitochondrial OS=Homo sapiens GN=HADH PE=1 SV=3	34328.96	0	0	0	0	0	0	0	0	0	1	0	0	0	0	0	0	0	0	0	0	0	0	0	1	0	0	0	0	0	0	0	0	0	0	0	0	0	1	0	0	0	0
1011	sp|Q9H9B4|SFXN1_HUMAN	sp|Q9H9B4|SFXN1_HUMAN Sideroflexin-1 OS=Homo sapiens GN=SFXN1 PE=1 SV=4	35881.45	0	0	0	0	0	0	0	1	0	0	0	0	0	0	0	0	0	0	0	0	0	1	0	0	0	0	0	0	0	0	0	0	0	0	0	1	0	0	0	0	0	0
1012	sp|P30042|ES1_HUMAN	sp|P30042|ES1_HUMAN ES1 protein homolog, mitochondrial OS=Homo sapiens GN=C21orf33 PE=1 SV=3	28494.86	0	0	0	0	0	0	0	0	0	0	1	0	0	0	0	0	0	0	0	0	0	0	0	0	1	0	0	0	0	0	0	0	0	0	0	0	0	0	1	0	0	0
1013	sp|O00410|IPO5_HUMAN	sp|O00410|IPO5_HUMAN Importin-5 OS=Homo sapiens GN=IPO5 PE=1 SV=4	125032.42	0	0	0	0	0	0	0	0	0	0	0	0	0	1	0	0	0	0	0	0	0	0	0	0	0	0	0	1	0	0	0	0	0	0	0	0	0	0	0	0	0	1
1014	sp|Q9Y5L0|TNPO3_HUMAN	sp|Q9Y5L0|TNPO3_HUMAN Transportin-3 OS=Homo sapiens GN=TNPO3 PE=1 SV=3	105960.76	1	0	0	0	0	0	0	0	0	0	0	0	0	0	1	0	0	0	0	0	0	0	0	0	0	0	0	0	1	0	0	0	0	0	0	0	0	0	0	0	0	0
1015	sp|P60983|GMFB_HUMAN	sp|P60983|GMFB_HUMAN Glia maturation factor beta OS=Homo sapiens GN=GMFB PE=1 SV=2	16873.55	1	0	0	0	0	0	0	0	0	0	0	0	0	0	1	0	0	0	0	0	0	0	0	0	0	0	0	0	1	0	0	0	0	0	0	0	0	0	0	0	0	0
1016	sp|O00204|ST2B1_HUMAN	sp|O00204|ST2B1_HUMAN Sulfotransferase family cytosolic 2B member 1 OS=Homo sapiens GN=SULT2B1 PE=1 SV=2	41509.58	0	1	0	0	0	0	0	0	0	0	0	0	0	0	0	1	0	0	0	0	0	0	0	0	0	0	0	0	0	1	0	0	0	0	0	0	0	0	0	0	0	0
1017	sp|P26368|U2AF2_HUMAN	sp|P26368|U2AF2_HUMAN Splicing factor U2AF 65 kDa subunit OS=Homo sapiens GN=U2AF2 PE=1 SV=4	53809.32	0	0	0	1	0	0	0	0	0	0	0	0	0	0	0	0	0	1	0	0	0	0	0	0	0	0	0	0	0	0	0	1	0	0	0	0	0	0	0	0	0	0
1018	sp|Q5T750|XP32_HUMAN	sp|Q5T750|XP32_HUMAN Skin-specific protein 32 OS=Homo sapiens GN=XP32 PE=1 SV=1	28557.15	0	0	0	0	0	0	0	1	0	0	0	0	0	0	0	0	0	0	0	0	0	1	0	0	0	0	0	0	0	0	0	0	0	0	0	1	0	0	0	0	0	0
1019	sp|Q99935|PROL1_HUMAN	sp|Q99935|PROL1_HUMAN Opiorphin prepropeptide OS=Homo sapiens GN=OPRPN PE=1 SV=2	27256.45	0	0	0	1	0	0	0	0	0	0	0	0	0	0	0	0	0	1	0	0	0	0	0	0	0	0	0	0	0	0	0	1	0	0	0	0	0	0	0	0	0	0
1020	sp|P98171|RHG04_HUMAN	sp|P98171|RHG04_HUMAN Rho GTPase-activating protein 4 OS=Homo sapiens GN=ARHGAP4 PE=1 SV=2	105815.76	0	0	0	0	0	0	0	0	0	1	0	0	0	0	0	0	0	0	0	0	0	0	0	1	0	0	0	0	0	0	0	0	0	0	0	0	0	1	0	0	0	0
1021	sp|Q13835|PKP1_HUMAN	sp|Q13835|PKP1_HUMAN Plakophilin-1 OS=Homo sapiens GN=PKP1 PE=1 SV=2	84119.32	0	0	0	0	0	0	0	0	0	1	0	0	0	0	0	0	0	0	0	0	0	0	0	1	0	0	0	0	0	0	0	0	0	0	0	0	0	1	0	0	0	0
1022	sp|P04066|FUCO_HUMAN	sp|P04066|FUCO_HUMAN Tissue alpha-L-fucosidase OS=Homo sapiens GN=FUCA1 PE=1 SV=4	53939.83	0	0	0	0	0	0	0	0	0	0	1	0	0	0	0	0	0	0	0	0	0	0	0	0	1	0	0	0	0	0	0	0	0	0	0	0	0	0	1	0	0	0
1023	sp|Q15029|U5S1_HUMAN	sp|Q15029|U5S1_HUMAN 116 kDa U5 small nuclear ribonucleoprotein component OS=Homo sapiens GN=EFTUD2 PE=1 SV=1	110335.65	0	0	0	0	0	0	1	0	0	0	0	0	0	0	0	0	0	0	0	0	1	0	0	0	0	0	0	0	0	0	0	0	0	0	1	0	0	0	0	0	0	0
1024	sp|Q13561|DCTN2_HUMAN	sp|Q13561|DCTN2_HUMAN Dynactin subunit 2 OS=Homo sapiens GN=DCTN2 PE=1 SV=4	44317.9	0	0	1	0	0	0	0	0	0	0	0	0	0	0	0	0	1	0	0	0	0	0	0	0	0	0	0	0	0	0	1	0	0	0	0	0	0	0	0	0	0	0
1025	sp|Q15084|PDIA6_HUMAN	sp|Q15084|PDIA6_HUMAN Protein disulfide-isomerase A6 OS=Homo sapiens GN=PDIA6 PE=1 SV=1	48490.41	0	1	0	0	0	0	0	0	0	0	0	0	0	0	0	1	0	0	0	0	0	0	0	0	0	0	0	0	0	1	0	0	0	0	0	0	0	0	0	0	0	0
1026	sp|P28330|ACADL_HUMAN	sp|P28330|ACADL_HUMAN Long-chain specific acyl-CoA dehydrogenase, mitochondrial OS=Homo sapiens GN=ACADL PE=1 SV=2	48024.5	0	0	0	0	0	0	0	0	0	1	0	0	0	0	0	0	0	0	0	0	0	0	0	1	0	0	0	0	0	0	0	0	0	0	0	0	0	1	0	0	0	0
1027	sp|Q92953|KCNB2_HUMAN	sp|Q92953|KCNB2_HUMAN Potassium voltage-gated channel subfamily B member 2 OS=Homo sapiens GN=KCNB2 PE=2 SV=2	103638.82	0	0	0	0	1	0	0	0	0	0	0	0	0	0	0	0	0	0	1	0	0	0	0	0	0	0	0	0	0	0	0	0	1	0	0	0	0	0	0	0	0	0
1028	sp|Q9Y6G9|DC1L1_HUMAN	sp|Q9Y6G9|DC1L1_HUMAN Cytoplasmic dynein 1 light intermediate chain 1 OS=Homo sapiens GN=DYNC1LI1 PE=1 SV=3	56829.11	0	0	0	0	0	1	0	0	0	0	0	0	0	0	0	0	0	0	0	1	0	0	0	0	0	0	0	0	0	0	0	0	0	1	0	0	0	0	0	0	0	0
1029	sp|Q9Y230|RUVB2_HUMAN	sp|Q9Y230|RUVB2_HUMAN RuvB-like 2 OS=Homo sapiens GN=RUVBL2 PE=1 SV=3	51295.62	0	0	0	0	0	0	0	0	0	0	1	0	0	0	0	0	0	0	0	0	0	0	0	0	1	0	0	0	0	0	0	0	0	0	0	0	0	0	1	0	0	0
1030	sp|Q9UHQ9|NB5R1_HUMAN	sp|Q9UHQ9|NB5R1_HUMAN NADH-cytochrome b5 reductase 1 OS=Homo sapiens GN=CYB5R1 PE=1 SV=1	34244.25	0	0	0	0	1	0	0	0	0	0	0	0	0	0	0	0	0	0	1	0	0	0	0	0	0	0	0	0	0	0	0	0	1	0	0	0	0	0	0	0	0	0
1031	sp|P05556|ITB1_HUMAN	sp|P05556|ITB1_HUMAN Integrin beta-1 OS=Homo sapiens GN=ITGB1 PE=1 SV=2	91664.26	0	0	0	0	0	0	0	0	0	0	0	0	0	1	0	0	0	0	0	0	0	0	0	0	0	0	0	1	0	0	0	0	0	0	0	0	0	0	0	0	0	1
1032	sp|P07358|CO8B_HUMAN	sp|P07358|CO8B_HUMAN Complement component C8 beta chain OS=Homo sapiens GN=C8B PE=1 SV=3	68714.12	0	0	0	0	1	0	0	0	0	0	0	0	0	0	0	0	0	0	1	0	0	0	0	0	0	0	0	0	0	0	0	0	1	0	0	0	0	0	0	0	0	0
1033	sp|P28065|PSB9_HUMAN	sp|P28065|PSB9_HUMAN Proteasome subunit beta type-9 OS=Homo sapiens GN=PSMB9 PE=1 SV=2	23363.58	1	0	0	0	0	0	0	0	0	0	0	0	0	0	1	0	0	0	0	0	0	0	0	0	0	0	0	0	1	0	0	0	0	0	0	0	0	0	0	0	0	0
1034	sp|Q6ZUT9|DEN5B_HUMAN	sp|Q6ZUT9|DEN5B_HUMAN DENN domain-containing protein 5B OS=Homo sapiens GN=DENND5B PE=1 SV=2	146637.48	0	0	0	0	0	0	0	0	0	1	0	0	0	0	0	0	0	0	0	0	0	0	0	1	0	0	0	0	0	0	0	0	0	0	0	0	0	1	0	0	0	0
1035	sp|Q96HC4|PDLI5_HUMAN	sp|Q96HC4|PDLI5_HUMAN PDZ and LIM domain protein 5 OS=Homo sapiens GN=PDLIM5 PE=1 SV=5	65101.94	0	0	0	0	0	0	0	1	0	0	0	0	0	0	0	0	0	0	0	0	0	1	0	0	0	0	0	0	0	0	0	0	0	0	0	1	0	0	0	0	0	0
1036	sp|Q9UHY1|NRBP_HUMAN	sp|Q9UHY1|NRBP_HUMAN Nuclear receptor-binding protein OS=Homo sapiens GN=NRBP1 PE=1 SV=1	60377.34	0	1	0	0	0	0	0	0	0	0	0	0	0	0	0	1	0	0	0	0	0	0	0	0	0	0	0	0	0	1	0	0	0	0	0	0	0	0	0	0	0	0
1037	sp|Q96I99|SUCB2_HUMAN	SUCB2_HUMAN Succinate--CoA ligase	46823.56	0	0	0	0	0	0	0	0	0	0	0	1	0	0	0	0	0	0	0	0	0	0	0	0	0	1	0	0	0	0	0	0	0	0	0	0	0	0	0	1	0	0
1038	sp|Q9UBI6|GBG12_HUMAN	sp|Q9UBI6|GBG12_HUMAN Guanine nucleotide-binding protein G(I)/G(S)/G(O) subunit gamma-12 OS=Homo sapiens GN=GNG12 PE=1 SV=3	8115.21	0	0	0	0	0	1	0	0	0	0	0	0	0	0	0	0	0	0	0	1	0	0	0	0	0	0	0	0	0	0	0	0	0	1	0	0	0	0	0	0	0	0
1039	sp|P21964|COMT_HUMAN	sp|P21964|COMT_HUMAN Catechol O-methyltransferase OS=Homo sapiens GN=COMT PE=1 SV=2	30473.8	0	0	0	0	0	0	0	0	1	0	0	0	0	0	0	0	0	0	0	0	0	0	1	0	0	0	0	0	0	0	0	0	0	0	0	0	1	0	0	0	0	0
1040	sp|Q15046|SYK_HUMAN	sp|Q15046|SYK_HUMAN Lysine--tRNA ligase OS=Homo sapiens GN=KARS PE=1 SV=3	68460.76	0	0	1	0	0	0	0	0	0	0	0	0	0	0	0	0	1	0	0	0	0	0	0	0	0	0	0	0	0	0	1	0	0	0	0	0	0	0	0	0	0	0
1041	sp|P20591|MX1_HUMAN	sp|P20591|MX1_HUMAN Interferon-induced GTP-binding protein Mx1 OS=Homo sapiens GN=MX1 PE=1 SV=4	75872.37	0	0	0	0	0	0	0	0	0	0	0	0	1	0	0	0	0	0	0	0	0	0	0	0	0	0	1	0	0	0	0	0	0	0	0	0	0	0	0	0	1	0
1042	sp|Q96BW5|PTER_HUMAN	sp|Q96BW5|PTER_HUMAN Phosphotriesterase-related protein OS=Homo sapiens GN=PTER PE=1 SV=1	39506.2	0	0	0	0	0	0	0	0	0	1	0	0	0	0	0	0	0	0	0	0	0	0	0	1	0	0	0	0	0	0	0	0	0	0	0	0	0	1	0	0	0	0
1043	sp|Q99805|TM9S2_HUMAN	sp|Q99805|TM9S2_HUMAN Transmembrane 9 superfamily member 2 OS=Homo sapiens GN=TM9SF2 PE=1 SV=1	76808.88	0	0	1	0	0	0	0	0	0	0	0	0	0	0	0	0	1	0	0	0	0	0	0	0	0	0	0	0	0	0	1	0	0	0	0	0	0	0	0	0	0	0
1044	sp|Q13098|CSN1_HUMAN	sp|Q13098|CSN1_HUMAN COP9 signalosome complex subunit 1 OS=Homo sapiens GN=GPS1 PE=1 SV=4	56071.38	0	0	0	0	0	0	0	0	0	0	0	0	1	0	0	0	0	0	0	0	0	0	0	0	0	0	1	0	0	0	0	0	0	0	0	0	0	0	0	0	1	0
1045	sp|P62829|RL23_HUMAN	sp|P62829|RL23_HUMAN 60S ribosomal protein L23 OS=Homo sapiens GN=RPL23 PE=1 SV=1	14970.1	0	0	0	0	0	0	0	0	0	0	0	0	1	0	0	0	0	0	0	0	0	0	0	0	0	0	1	0	0	0	0	0	0	0	0	0	0	0	0	0	1	0
1046	sp|O43242|PSMD3_HUMAN	sp|O43242|PSMD3_HUMAN 26S proteasome non-ATPase regulatory subunit 3 OS=Homo sapiens GN=PSMD3 PE=1 SV=2	61053.53	0	0	0	0	0	0	0	0	1	0	0	0	0	0	0	0	0	0	0	0	0	0	1	0	0	0	0	0	0	0	0	0	0	0	0	0	1	0	0	0	0	0
1047	sp|P01880|IGHD_HUMAN	sp|P01880|IGHD_HUMAN Ig delta chain C region OS=Homo sapiens GN=IGHD PE=1 SV=2	42683.41	0	0	0	0	0	0	0	0	0	0	1	0	0	0	0	0	0	0	0	0	0	0	0	0	1	0	0	0	0	0	0	0	0	0	0	0	0	0	1	0	0	0
1048	sp|O15245|S22A1_HUMAN	sp|O15245|S22A1_HUMAN Solute carrier family 22 member 1 OS=Homo sapiens GN=SLC22A1 PE=1 SV=2	62025.97	0	0	0	0	0	0	0	0	1	0	0	0	0	0	0	0	0	0	0	0	0	0	1	0	0	0	0	0	0	0	0	0	0	0	0	0	1	0	0	0	0	0
1049	sp|P35237|SPB6_HUMAN	sp|P35237|SPB6_HUMAN Serpin B6 OS=Homo sapiens GN=SERPINB6 PE=1 SV=3	42936.19	0	0	0	0	0	0	0	0	0	0	0	0	0	1	0	0	0	0	0	0	0	0	0	0	0	0	0	1	0	0	0	0	0	0	0	0	0	0	0	0	0	1
1050	sp|P62244|RS15A_HUMAN	sp|P62244|RS15A_HUMAN 40S ribosomal protein S15a OS=Homo sapiens GN=RPS15A PE=1 SV=2	14944.01	0	0	0	0	0	0	0	0	0	1	0	0	0	0	0	0	0	0	0	0	0	0	0	1	0	0	0	0	0	0	0	0	0	0	0	0	0	1	0	0	0	0
1051	sp|Q14232|EI2BA_HUMAN	sp|Q14232|EI2BA_HUMAN Translation initiation factor eIF-2B subunit alpha OS=Homo sapiens GN=EIF2B1 PE=1 SV=1	33975.86	0	0	0	0	0	0	0	1	0	0	0	0	0	0	0	0	0	0	0	0	0	1	0	0	0	0	0	0	0	0	0	0	0	0	0	1	0	0	0	0	0	0
1052	sp|O60826|CCD22_HUMAN	sp|O60826|CCD22_HUMAN Coiled-coil domain-containing protein 22 OS=Homo sapiens GN=CCDC22 PE=1 SV=1	71054.33	0	0	1	0	0	0	0	0	0	0	0	0	0	0	0	0	1	0	0	0	0	0	0	0	0	0	0	0	0	0	1	0	0	0	0	0	0	0	0	0	0	0
1053	sp|Q9UKK3|PARP4_HUMAN	PARP4_HUMAN Poly	194582.18	0	0	0	0	0	0	1	0	0	0	0	0	0	0	0	0	0	0	0	0	1	0	0	0	0	0	0	0	0	0	0	0	0	0	1	0	0	0	0	0	0	0
1054	sp|Q92614|MY18A_HUMAN	sp|Q92614|MY18A_HUMAN Unconventional myosin-XVIIIa OS=Homo sapiens GN=MYO18A PE=1 SV=3	234168.48	0	0	0	1	0	0	0	0	0	0	0	0	0	0	0	0	0	1	0	0	0	0	0	0	0	0	0	0	0	0	0	1	0	0	0	0	0	0	0	0	0	0
1055	sp|O95834|EMAL2_HUMAN	sp|O95834|EMAL2_HUMAN Echinoderm microtubule-associated protein-like 2 OS=Homo sapiens GN=EML2 PE=1 SV=1	71603.44	0	0	0	0	0	0	0	0	0	1	0	0	0	0	0	0	0	0	0	0	0	0	0	1	0	0	0	0	0	0	0	0	0	0	0	0	0	1	0	0	0	0
1056	sp|Q687X5|STEA4_HUMAN	sp|Q687X5|STEA4_HUMAN Metalloreductase STEAP4 OS=Homo sapiens GN=STEAP4 PE=1 SV=1	52517.76	0	0	0	1	0	0	0	0	0	0	0	0	0	0	0	0	0	1	0	0	0	0	0	0	0	0	0	0	0	0	0	1	0	0	0	0	0	0	0	0	0	0
1057	sp|O43683|BUB1_HUMAN	sp|O43683|BUB1_HUMAN Mitotic checkpoint serine/threonine-protein kinase BUB1 OS=Homo sapiens GN=BUB1 PE=1 SV=1	123437.43	0	0	0	0	0	0	0	0	0	0	0	1	0	0	0	0	0	0	0	0	0	0	0	0	0	1	0	0	0	0	0	0	0	0	0	0	0	0	0	1	0	0
1058	sp|P50135|HNMT_HUMAN	sp|P50135|HNMT_HUMAN Histamine N-methyltransferase OS=Homo sapiens GN=HNMT PE=1 SV=1	33615.71	0	0	0	0	0	0	0	0	0	0	0	0	1	0	0	0	0	0	0	0	0	0	0	0	0	0	1	0	0	0	0	0	0	0	0	0	0	0	0	0	1	0
1059	sp|Q5VT06|CE350_HUMAN	sp|Q5VT06|CE350_HUMAN Centrosome-associated protein 350 OS=Homo sapiens GN=CEP350 PE=1 SV=1	352312.4	0	0	0	0	0	0	1	0	0	0	0	0	0	0	0	0	0	0	0	0	1	0	0	0	0	0	0	0	0	0	0	0	0	0	1	0	0	0	0	0	0	0
1060	sp|Q15075|EEA1_HUMAN	sp|Q15075|EEA1_HUMAN Early endosome antigen 1 OS=Homo sapiens GN=EEA1 PE=1 SV=2	163336.54	0	0	0	0	0	0	0	0	0	0	0	0	1	0	0	0	0	0	0	0	0	0	0	0	0	0	1	0	0	0	0	0	0	0	0	0	0	0	0	0	1	0
1061	sp|O95274|LYPD3_HUMAN	sp|O95274|LYPD3_HUMAN Ly6/PLAUR domain-containing protein 3 OS=Homo sapiens GN=LYPD3 PE=1 SV=2	37031.03	0	0	0	0	0	0	0	0	0	0	0	1	0	0	0	0	0	0	0	0	0	0	0	0	0	1	0	0	0	0	0	0	0	0	0	0	0	0	0	1	0	0
1062	sp|P11387|TOP1_HUMAN	sp|P11387|TOP1_HUMAN DNA topoisomerase 1 OS=Homo sapiens GN=TOP1 PE=1 SV=2	91125.08	0	0	0	0	0	0	0	0	0	1	0	0	0	0	0	0	0	0	0	0	0	0	0	1	0	0	0	0	0	0	0	0	0	0	0	0	0	1	0	0	0	0
1063	sp|Q9Y394|DHRS7_HUMAN	sp|Q9Y394|DHRS7_HUMAN Dehydrogenase/reductase SDR family member 7 OS=Homo sapiens GN=DHRS7 PE=1 SV=1	38673.27	0	0	0	0	0	0	0	0	0	0	0	1	0	0	0	0	0	0	0	0	0	0	0	0	0	1	0	0	0	0	0	0	0	0	0	0	0	0	0	1	0	0
1064	sp|Q96LJ7|DHRS1_HUMAN	sp|Q96LJ7|DHRS1_HUMAN Dehydrogenase/reductase SDR family member 1 OS=Homo sapiens GN=DHRS1 PE=1 SV=1	34457.53	0	1	0	0	0	0	0	0	0	0	0	0	0	0	0	1	0	0	0	0	0	0	0	0	0	0	0	0	0	1	0	0	0	0	0	0	0	0	0	0	0	0
1065	sp|O00231|PSD11_HUMAN	sp|O00231|PSD11_HUMAN 26S proteasome non-ATPase regulatory subunit 11 OS=Homo sapiens GN=PSMD11 PE=1 SV=3	47719.15	0	1	0	0	0	0	0	0	0	0	0	0	0	0	0	1	0	0	0	0	0	0	0	0	0	0	0	0	0	1	0	0	0	0	0	0	0	0	0	0	0	0
1066	sp|Q92973|TNPO1_HUMAN	sp|Q92973|TNPO1_HUMAN Transportin-1 OS=Homo sapiens GN=TNPO1 PE=1 SV=2	103771.34	0	0	0	0	0	0	1	0	0	0	0	0	0	0	0	0	0	0	0	0	1	0	0	0	0	0	0	0	0	0	0	0	0	0	1	0	0	0	0	0	0	0
1067	sp|Q6EEV6|SUMO4_HUMAN	sp|Q6EEV6|SUMO4_HUMAN Small ubiquitin-related modifier 4 OS=Homo sapiens GN=SUMO4 PE=1 SV=2	10735.38	0	0	0	1	0	0	0	0	0	0	0	0	0	0	0	0	0	1	0	0	0	0	0	0	0	0	0	0	0	0	0	1	0	0	0	0	0	0	0	0	0	0
1068	sp|Q15459|SF3A1_HUMAN	sp|Q15459|SF3A1_HUMAN Splicing factor 3A subunit 1 OS=Homo sapiens GN=SF3A1 PE=1 SV=1	88887.53	0	0	0	0	0	0	1	0	0	0	0	0	0	0	0	0	0	0	0	0	1	0	0	0	0	0	0	0	0	0	0	0	0	0	1	0	0	0	0	0	0	0
1069	sp|Q99442|SEC62_HUMAN	sp|Q99442|SEC62_HUMAN Translocation protein SEC62 OS=Homo sapiens GN=SEC62 PE=1 SV=1	46175.26	0	0	1	0	0	0	0	0	0	0	0	0	0	0	0	0	1	0	0	0	0	0	0	0	0	0	0	0	0	0	1	0	0	0	0	0	0	0	0	0	0	0
1070	sp|Q96P48|ARAP1_HUMAN	sp|Q96P48|ARAP1_HUMAN Arf-GAP with Rho-GAP domain, ANK repeat and PH domain-containing protein 1 OS=Homo sapiens GN=ARAP1 PE=1 SV=3	163742.98	0	0	0	0	0	1	0	0	0	0	0	0	0	0	0	0	0	0	0	1	0	0	0	0	0	0	0	0	0	0	0	0	0	1	0	0	0	0	0	0	0	0
1071	sp|Q8WVX9|FACR1_HUMAN	sp|Q8WVX9|FACR1_HUMAN Fatty acyl-CoA reductase 1 OS=Homo sapiens GN=FAR1 PE=1 SV=1	59660.92	1	0	0	0	0	0	0	0	0	0	0	0	0	0	1	0	0	0	0	0	0	0	0	0	0	0	0	0	1	0	0	0	0	0	0	0	0	0	0	0	0	0
1072	sp|P05141|ADT2_HUMAN	sp|P05141|ADT2_HUMAN ADP/ATP translocase 2 OS=Homo sapiens GN=SLC25A5 PE=1 SV=7	33059.24	0	0	0	0	1	0	0	0	1	0	0	0	0	0	0	0	0	0	1	0	0	0	1	0	0	0	0	0	0	0	0	0	1	0	0	0	1	0	0	0	0	0
1073	sp|P50851|LRBA_HUMAN	sp|P50851|LRBA_HUMAN Lipopolysaccharide-responsive and beige-like anchor protein OS=Homo sapiens GN=LRBA PE=1 SV=4	321586.04	0	0	0	0	0	0	0	0	0	0	1	0	0	0	0	0	0	0	0	0	0	0	0	0	1	0	0	0	0	0	0	0	0	0	0	0	0	0	1	0	0	0
1074	sp|Q13423|NNTM_HUMAN	sp|Q13423|NNTM_HUMAN NAD(P) transhydrogenase, mitochondrial OS=Homo sapiens GN=NNT PE=1 SV=3	114563.83	0	0	0	0	0	0	1	0	0	0	0	0	0	0	0	0	0	0	0	0	1	0	0	0	0	0	0	0	0	0	0	0	0	0	1	0	0	0	0	0	0	0
1075	sp|Q99567|NUP88_HUMAN	sp|Q99567|NUP88_HUMAN Nuclear pore complex protein Nup88 OS=Homo sapiens GN=NUP88 PE=1 SV=2	84629.19	0	0	0	0	0	0	0	1	0	0	0	0	0	0	0	0	0	0	0	0	0	1	0	0	0	0	0	0	0	0	0	0	0	0	0	1	0	0	0	0	0	0
1076	sp|Q92882|OSTF1_HUMAN	sp|Q92882|OSTF1_HUMAN Osteoclast-stimulating factor 1 OS=Homo sapiens GN=OSTF1 PE=1 SV=2	23943.0	0	0	0	1	0	0	0	0	0	0	0	0	0	0	0	0	0	1	0	0	0	0	0	0	0	0	0	0	0	0	0	1	0	0	0	0	0	0	0	0	0	0
1077	sp|P56545|CTBP2_HUMAN	sp|P56545|CTBP2_HUMAN C-terminal-binding protein 2 OS=Homo sapiens GN=CTBP2 PE=1 SV=1	49427.31	0	0	0	0	0	0	0	0	0	0	1	0	0	0	0	0	0	0	0	0	0	0	0	0	1	0	0	0	0	0	0	0	0	0	0	0	0	0	1	0	0	0
1078	sp|Q8WZ42|TITIN_HUMAN	sp|Q8WZ42|TITIN_HUMAN Titin OS=Homo sapiens GN=TTN PE=1 SV=4	3842903.75	0	0	0	0	0	0	0	0	0	0	1	0	0	0	0	0	0	0	0	0	0	0	0	0	1	0	0	0	0	0	0	0	0	0	0	0	0	0	1	0	0	0
1079	sp|Q9UM00|TMCO1_HUMAN	sp|Q9UM00|TMCO1_HUMAN Calcium load-activated calcium channel OS=Homo sapiens GN=TMCO1 PE=1 SV=1	21389.24	0	0	0	0	0	0	0	0	0	0	0	0	0	1	0	0	0	0	0	0	0	0	0	0	0	0	0	1	0	0	0	0	0	0	0	0	0	0	0	0	0	1
1080	sp|Q53H82|LACB2_HUMAN	sp|Q53H82|LACB2_HUMAN Endoribonuclease LACTB2 OS=Homo sapiens GN=LACTB2 PE=1 SV=2	33070.05	0	0	0	0	0	0	1	0	0	0	0	0	0	0	0	0	0	0	0	0	1	0	0	0	0	0	0	0	0	0	0	0	0	0	1	0	0	0	0	0	0	0
1081	sp|Q15019|SEPT2_HUMAN	sp|Q15019|SEPT2_HUMAN Septin-2 OS=Homo sapiens GN=SEPT2 PE=1 SV=1	41689.34	0	0	1	0	0	0	0	0	0	0	0	0	0	0	0	0	1	0	0	0	0	0	0	0	0	0	0	0	0	0	1	0	0	0	0	0	0	0	0	0	0	0
1082	sp|Q14192|FHL2_HUMAN	sp|Q14192|FHL2_HUMAN Four and a half LIM domains protein 2 OS=Homo sapiens GN=FHL2 PE=1 SV=3	34166.37	0	0	0	0	0	0	0	0	1	0	0	0	0	0	0	0	0	0	0	0	0	0	1	0	0	0	0	0	0	0	0	0	0	0	0	0	1	0	0	0	0	0
1083	sp|Q9H0B8|CRLD2_HUMAN	sp|Q9H0B8|CRLD2_HUMAN Cysteine-rich secretory protein LCCL domain-containing 2 OS=Homo sapiens GN=CRISPLD2 PE=2 SV=1	57365.63	0	0	0	0	0	0	0	0	0	0	0	1	0	0	0	0	0	0	0	0	0	0	0	0	0	1	0	0	0	0	0	0	0	0	0	0	0	0	0	1	0	0
1084	sp|Q6IBS0|TWF2_HUMAN	sp|Q6IBS0|TWF2_HUMAN Twinfilin-2 OS=Homo sapiens GN=TWF2 PE=1 SV=2	39751.36	1	0	0	0	0	0	0	0	0	0	0	0	0	0	1	0	0	0	0	0	0	0	0	0	0	0	0	0	1	0	0	0	0	0	0	0	0	0	0	0	0	0
1085	sp|Q6WKZ4|RFIP1_HUMAN	sp|Q6WKZ4|RFIP1_HUMAN Rab11 family-interacting protein 1 OS=Homo sapiens GN=RAB11FIP1 PE=1 SV=3	137482.01	0	0	0	0	0	0	0	0	0	0	0	0	1	0	0	0	0	0	0	0	0	0	0	0	0	0	1	0	0	0	0	0	0	0	0	0	0	0	0	0	1	0
1086	sp|O60716|CTND1_HUMAN	sp|O60716|CTND1_HUMAN Catenin delta-1 OS=Homo sapiens GN=CTNND1 PE=1 SV=1	108673.59	1	0	0	0	0	0	0	0	0	0	0	0	0	0	1	0	0	0	0	0	0	0	0	0	0	0	0	0	1	0	0	0	0	0	0	0	0	0	0	0	0	0
1087	sp|P83436|COG7_HUMAN	sp|P83436|COG7_HUMAN Conserved oligomeric Golgi complex subunit 7 OS=Homo sapiens GN=COG7 PE=1 SV=1	86973.22	0	0	0	0	0	0	0	0	0	0	0	0	1	0	0	0	0	0	0	0	0	0	0	0	0	0	1	0	0	0	0	0	0	0	0	0	0	0	0	0	1	0
1088	sp|Q86Y34|AGRG3_HUMAN	sp|Q86Y34|AGRG3_HUMAN Adhesion G protein-coupled receptor G3 OS=Homo sapiens GN=ADGRG3 PE=1 SV=1	61676.82	0	0	0	0	0	1	0	0	0	0	0	0	0	0	0	0	0	0	0	1	0	0	0	0	0	0	0	0	0	0	0	0	0	1	0	0	0	0	0	0	0	0
1089	sp|Q12979|ABR_HUMAN	sp|Q12979|ABR_HUMAN Active breakpoint cluster region-related protein OS=Homo sapiens GN=ABR PE=2 SV=2	98106.38	0	0	0	0	0	0	0	0	0	0	0	0	0	1	0	0	0	0	0	0	0	0	0	0	0	0	0	1	0	0	0	0	0	0	0	0	0	0	0	0	0	1
1090	sp|Q06323|PSME1_HUMAN	sp|Q06323|PSME1_HUMAN Proteasome activator complex subunit 1 OS=Homo sapiens GN=PSME1 PE=1 SV=1	28876.08	0	0	0	0	0	0	0	0	1	0	0	0	0	0	0	0	0	0	0	0	0	0	1	0	0	0	0	0	0	0	0	0	0	0	0	0	1	0	0	0	0	0
1091	sp|P46734|MP2K3_HUMAN	sp|P46734|MP2K3_HUMAN Dual specificity mitogen-activated protein kinase kinase 3 OS=Homo sapiens GN=MAP2K3 PE=1 SV=2	39635.06	0	0	0	0	0	0	0	0	0	0	0	0	0	1	0	0	0	0	0	0	0	0	0	0	0	0	0	1	0	0	0	0	0	0	0	0	0	0	0	0	0	1
1092	sp|Q9BV20|MTNA_HUMAN	sp|Q9BV20|MTNA_HUMAN Methylthioribose-1-phosphate isomerase OS=Homo sapiens GN=MRI1 PE=1 SV=1	39467.48	0	0	0	0	0	0	1	0	0	0	0	0	0	0	0	0	0	0	0	0	1	0	0	0	0	0	0	0	0	0	0	0	0	0	1	0	0	0	0	0	0	0
1093	sp|Q96G21|IMP4_HUMAN	sp|Q96G21|IMP4_HUMAN U3 small nucleolar ribonucleoprotein protein IMP4 OS=Homo sapiens GN=IMP4 PE=1 SV=1	33849.58	0	0	0	0	0	0	0	0	0	1	0	0	0	0	0	0	0	0	0	0	0	0	0	1	0	0	0	0	0	0	0	0	0	0	0	0	0	1	0	0	0	0
1094	sp|Q96TC7|RMD3_HUMAN	sp|Q96TC7|RMD3_HUMAN Regulator of microtubule dynamics protein 3 OS=Homo sapiens GN=RMDN3 PE=1 SV=2	52542.21	0	0	0	0	0	0	0	0	1	0	0	0	0	0	0	0	0	0	0	0	0	0	1	0	0	0	0	0	0	0	0	0	0	0	0	0	1	0	0	0	0	0
